# Supplementary material for: Splicing Patterns in SF3B1 -Mutated Uveal Melanoma Generate Shared Immunogenic Tumor-Specific Neoepitopes
Source: Oxford University Press journal article supplement (doi:10.1158/2159-8290.cd-20-0555), 2021-04-02
Supplement: cd-20-0555_supplementary_table_s1_suppst1.xlsx [file cd-20-0555_supplementary_table_s1_suppst1.xlsx]

## Sheet: Feuil1
Patient Number	Clinical Trial	SF3B1 mutation	Age at diagnosis	Metastasis-Free Interval (in months)
UM1	IC 2004-01	R625S	52	46
UM2	IC 2004-01	R625C	65	55
UM3	IC 2004-01	R625H	43	45
UM4	IC 2004-01	R625C	37	203
UM5	IC 2004-01	R625C	39	34
UM6	IC 2004-01	R625L	51	14
UM7	IC 2004-01	R625L	39	80
UM8	IC 2004-01	R625C	63	43
UM9	CP99-03	none	49	13
UM10	IC 2004-01	none	37	0
UM11	CP99-03	none	59	35
UM12	IC 2004-01	none	47	14
UM13	IC 2004-01	none	56	4
PDX1	Metastasis resection	R625H	46	44
PDX2	Metastasis resection	none	63	8
PDX3	Enucleation	none	50	36
