# Supplementary material for: Splicing Patterns in SF3B1 -Mutated Uveal Melanoma Generate Shared Immunogenic Tumor-Specific Neoepitopes
Source: Oxford University Press journal article supplement (doi:10.1158/2159-8290.cd-20-0555), 2021-04-02
Supplement: cd-20-0555_supplementary_table_s3_suppst3.xlsx [file cd-20-0555_supplementary_table_s3_suppst3.xlsx]

## Sheet: DEGs_UM1
	p_val	avg_logFC	pct.1	pct.2	p_val_adj	cluster	gene
ACTN1	3.53808995134033e-252	0.714329811336896	0.538	0.023	1.18660460788052e-247	1-Naive	ACTN1
RPS13	2.17188785543989e-167	0.580235147339796	0.997	1	7.2840774895743e-163	1-Naive	RPS13
RPL32	3.05200870453985e-160	0.471631723835113	0.997	1	1.02358267932858e-155	1-Naive	RPL32
RPS3A	5.16326758241213e-160	0.472637274643814	0.997	1	1.73165668178938e-155	1-Naive	RPS3A
RPS5	2.10726371981184e-148	0.547351530476032	0.997	0.998	7.06734106350495e-144	1-Naive	RPS5
RPS23	6.42247859083977e-135	0.393603266442208	0.997	1	2.15397086979584e-130	1-Naive	RPS23
RPS8	1.47481904964254e-132	0.441788865281104	0.997	1	4.94624812869116e-128	1-Naive	RPS8
PASK	5.82762843967864e-131	0.977440103525097	0.639	0.132	1.95447002609942e-126	1-Naive	PASK
RGS10	2.07667920579338e-130	1.05595237353312	0.924	0.472	6.96476672038982e-126	1-Naive	RGS10
EEF1A1	1.00621315909226e-128	0.318500197566018	1	1	3.37463769296361e-124	1-Naive	EEF1A1
EEF1B2	1.91312321420372e-127	0.561544690417535	0.994	0.997	6.41623263579643e-123	1-Naive	EEF1B2
RPL13	2.91430091903446e-127	0.370878168920201	1	1	9.77398242225778e-123	1-Naive	RPL13
RPL22	1.55144411268241e-125	0.525961554266393	0.997	0.998	5.20323326511426e-121	1-Naive	RPL22
RPL34	7.36574604487515e-124	0.345019525955312	1	0.998	2.47032390853023e-119	1-Naive	RPL34
RPS12	1.84535027091614e-123	0.344190975088154	0.997	1	6.18893573859856e-119	1-Naive	RPS12
AIF1	5.05986366173156e-119	0.573100812772006	0.507	0.078	1.69697707487153e-114	1-Naive	AIF1
RPL18	2.19309470229122e-115	0.367258772180991	0.994	0.999	7.35520101254429e-111	1-Naive	RPL18
RPL9	2.10718308399367e-114	0.410165017725785	0.994	0.998	7.06707062709798e-110	1-Naive	RPL9
RPL19	8.42994992617131e-111	0.328015658662939	1	1	2.82723660623933e-106	1-Naive	RPL19
RPL29	2.09376884927216e-109	0.364830055454291	0.997	0.999	7.02208196668895e-105	1-Naive	RPL29
LYPD3	5.00852918825274e-108	0.580080497705242	0.411	0.053	1.6797605191562e-103	1-Naive	LYPD3
RPL37	1.67514046502195e-106	0.331537575966315	0.997	0.999	5.61808609159063e-102	1-Naive	RPL37
RPL11	9.80467624484609e-106	0.324798097878832	0.997	1	3.28829231899648e-101	1-Naive	RPL11
RPS6	1.85970467390696e-105	0.394764265167394	0.997	0.999	6.23707753534915e-101	1-Naive	RPS6
RPL5	3.25341408346852e-103	0.416681945615153	0.997	0.999	1.09113001531367e-98	1-Naive	RPL5
BEX3	3.43470714368716e-102	0.42214316435671	0.324	0.03	1.1519320818498e-97	1-Naive	BEX3
RPS14	6.43004116260735e-101	0.300598737002758	0.997	0.999	2.15650720511525e-96	1-Naive	RPS14
CCDC57	6.8500312201322e-101	0.806748374950422	0.763	0.273	2.29736347060794e-96	1-Naive	CCDC57
LEF1	1.6684034856834e-99	0.762122538100236	0.634	0.168	5.59549161028498e-95	1-Naive	LEF1
MAL	2.35966478895813e-99	0.3995394255026	0.318	0.03	7.91384376920778e-95	1-Naive	MAL
RPS21	5.64078953498576e-97	0.287993874590796	1	0.999	1.89180799424352e-92	1-Naive	RPS21
GIMAP7	1.14100474492502e-96	1.06162007963762	0.797	0.336	3.82670171352954e-92	1-Naive	GIMAP7
RPS28	3.26020470857265e-96	0.27001009208784	0.997	0.999	1.09340745516109e-91	1-Naive	RPS28
SELL	4.04371766520025e-96	0.773449336982605	0.721	0.227	1.35618203055486e-91	1-Naive	SELL
RPL12	6.23391360613283e-94	0.349869889824001	1	0.998	2.09072994522483e-89	1-Naive	RPL12
RPL18A	1.57074355919711e-93	0.2984586219271	0.997	1	5.26795974883528e-89	1-Naive	RPL18A
CD248	1.81470118665873e-90	0.273792413657816	0.197	0.008	6.08614483981605e-86	1-Naive	CD248
RPL30	3.5065644780166e-90	0.254982087006729	1	1	1.17603159463721e-85	1-Naive	RPL30
RACK1	6.98645273680291e-88	0.393391353494737	0.997	0.997	2.34311651886896e-83	1-Naive	RACK1
NELL2	3.96484252559368e-87	0.690437846058985	0.769	0.287	1.32972888623361e-82	1-Naive	NELL2
RPL35A	1.33484651934908e-86	0.275400025509649	0.997	0.999	4.47680825659293e-82	1-Naive	RPL35A
CD55	7.54382084023927e-85	0.743499205906332	0.977	0.873	2.53004663339945e-80	1-Naive	CD55
MGAT4A	2.43743983307271e-84	0.710954228972231	0.766	0.291	8.17468571215925e-80	1-Naive	MGAT4A
NACA	3.81786660147871e-84	0.381487295469864	0.997	0.998	1.28043610080393e-79	1-Naive	NACA
RPL39	1.2143401962241e-82	0.257662368804826	1	1	4.07265415009638e-78	1-Naive	RPL39
PHLDB3	6.70274148848969e-77	0.513474888874177	0.524	0.133	2.24796544040967e-72	1-Naive	PHLDB3
TESPA1	1.13545149767458e-76	0.474600176497598	0.434	0.089	3.80807723290102e-72	1-Naive	TESPA1
RPL10A	6.59013326658971e-75	0.333130786178375	0.997	0.997	2.21019889494886e-70	1-Naive	RPL10A
NDFIP1	3.17874299439905e-73	0.658896791358129	0.921	0.652	1.06608682546155e-68	1-Naive	NDFIP1
RPS4X	2.79857584046873e-70	0.260617107127175	0.997	1	9.38586365376402e-66	1-Naive	RPS4X
ATP5IF1	1.02349901034201e-69	0.712035897260774	0.837	0.48	3.43261098088502e-65	1-Naive	ATP5IF1
RIC3	1.63892686077893e-66	0.257604384314246	0.2	0.017	5.49663290568039e-62	1-Naive	RIC3
RPL14	6.14650003198861e-65	0.258117162732888	0.997	1	2.06141318072834e-60	1-Naive	RPL14
SARAF	1.76008897024855e-64	0.409896621590498	1	0.998	5.9029863884196e-60	1-Naive	SARAF
RPL4	1.84605551823251e-63	0.383566844190586	0.997	0.992	6.19130099704818e-59	1-Naive	RPL4
RPL21	1.65458725541284e-62	0.275284426762199	0.994	0.999	5.54915473720358e-58	1-Naive	RPL21
RPL7	3.81083435160458e-62	0.396464521145268	0.994	0.984	1.27807762484114e-57	1-Naive	RPL7
RPS9	9.41663162475221e-61	0.28885915046018	0.997	0.998	3.1581499143094e-56	1-Naive	RPS9
H3F3A	5.02618218555221e-59	0.420650211648527	0.997	0.985	1.6856809813905e-54	1-Naive	H3F3A
TECR	5.54926915017068e-58	0.597621483928805	0.896	0.596	1.86111388758424e-53	1-Naive	TECR
RPL15	2.13847597182919e-56	0.27943970949435	1	0.998	7.17202071432073e-52	1-Naive	RPL15
RPSA	1.00036202854566e-54	0.295129662617911	0.997	0.998	3.35501417133643e-50	1-Naive	RPSA
FOXP1	7.68985063252127e-54	0.60700135306138	0.823	0.465	2.57902210513498e-49	1-Naive	FOXP1
FAM177A1	6.36706867305429e-53	0.640632523406433	0.966	0.955	2.13538749156895e-48	1-Naive	FAM177A1
RPS18	6.95476915429074e-53	0.254366489072539	0.997	0.999	2.33249047896603e-48	1-Naive	RPS18
ZEB1	1.38819596366746e-51	0.471031077587025	0.513	0.174	4.65573162294794e-47	1-Naive	ZEB1
APBA2	1.4226488289305e-51	0.41022310158887	0.372	0.093	4.77127964246711e-47	1-Naive	APBA2
HNRNPA1	4.7303979718492e-51	0.325937870349311	0.989	0.993	1.58648087179878e-46	1-Naive	HNRNPA1
KDM4B	8.59088623118776e-51	0.406812845053689	0.392	0.105	2.88121142421575e-46	1-Naive	KDM4B
ABLIM1	1.84401886791928e-50	0.615205522668685	0.955	0.764	6.18447047922768e-46	1-Naive	ABLIM1
WDR74	1.89274480774728e-50	0.532201586663212	0.744	0.378	6.34788753622283e-46	1-Naive	WDR74
FLT3LG	6.68507564061908e-48	0.554760206194702	0.896	0.647	2.24204066835083e-43	1-Naive	FLT3LG
CHKA	1.36766633997297e-47	0.339649784803837	0.307	0.068	4.58687937100136e-43	1-Naive	CHKA
RETREG1	2.82834835996917e-47	0.252990193701795	0.234	0.039	9.48571472966461e-43	1-Naive	RETREG1
LDHB	3.29574575748017e-47	0.488032753371733	0.938	0.829	1.1053272121437e-42	1-Naive	LDHB
FCMR	9.13420367583435e-47	0.44877760070857	0.51	0.181	3.06342922880132e-42	1-Naive	FCMR
EIF3E	1.65588791579538e-46	0.473242834587672	0.949	0.809	5.55351689199455e-42	1-Naive	EIF3E
SERINC5	3.01057471513606e-45	0.376219612060614	0.341	0.089	1.00968654796233e-40	1-Naive	SERINC5
SNHG8	3.29509561394216e-45	0.425277863731824	0.975	0.889	1.10510916700392e-40	1-Naive	SNHG8
COX4I1	4.79429680251179e-44	0.345472570427223	0.992	0.979	1.60791126162641e-39	1-Naive	COX4I1
RPL38	1.02880335770578e-43	0.276585508095755	0.994	0.995	3.45040070107364e-39	1-Naive	RPL38
SLC5A6	1.72844637412977e-43	0.388463866376484	0.375	0.108	5.79686344955641e-39	1-Naive	SLC5A6
MAPRE3	2.23299620599667e-43	0.372911322869328	0.321	0.081	7.48902267567162e-39	1-Naive	MAPRE3
PIK3IP1	5.33529047235406e-43	0.522373377565343	0.752	0.417	1.7893497186181e-38	1-Naive	PIK3IP1
CCR7	1.83787676739183e-42	0.475882399677443	0.977	0.707	6.16387110247871e-38	1-Naive	CCR7
NFATC1	3.48296233388591e-42	0.386913258985199	0.386	0.116	1.16811590753866e-37	1-Naive	NFATC1
CFAP20	1.0202010525396e-41	0.479146942166685	0.487	0.184	3.42155029000732e-37	1-Naive	CFAP20
SESN3	1.24813392527584e-41	0.504307987367342	0.377	0.117	4.18599155859012e-37	1-Naive	SESN3
RPS4Y1	1.31630109051248e-41	0.364985287476938	0.986	0.98	4.41461059736077e-37	1-Naive	RPS4Y1
UCP2	1.37614377054714e-41	0.526475347927474	0.913	0.704	4.61531097766099e-37	1-Naive	UCP2
NPM1	7.44093643835811e-41	0.306924421489714	0.992	0.988	2.49554126269654e-36	1-Naive	NPM1
SDCBP	1.51267578850061e-40	0.505688838339058	0.862	0.568	5.07321205947335e-36	1-Naive	SDCBP
AGPAT5	1.57515107315767e-40	0.328626003750772	0.265	0.059	5.28274166915621e-36	1-Naive	AGPAT5
EEF2	4.23126481998773e-40	0.280305508669568	0.997	0.996	1.41908159532749e-35	1-Naive	EEF2
SPINT2	4.30489356049375e-40	0.322374189367322	0.386	0.117	1.44377520231839e-35	1-Naive	SPINT2
PDE3B	5.13682840654925e-40	0.487341628452564	0.673	0.333	1.72278951098849e-35	1-Naive	PDE3B
SNN	2.39824045707215e-39	0.274787405549373	0.265	0.06	8.04321884492857e-35	1-Naive	SNN
RNF138	6.41583654970992e-39	0.484288069618811	0.685	0.36	2.15174326204171e-34	1-Naive	RNF138
ICAM2	3.44733270883407e-38	0.313436438084359	0.445	0.154	1.15616644388877e-33	1-Naive	ICAM2
IL6ST	4.53639792795983e-38	0.346902960739008	0.42	0.141	1.52141713707917e-33	1-Naive	IL6ST
TGFBR2	5.32177819526281e-38	0.510616358639763	0.611	0.309	1.78481797112724e-33	1-Naive	TGFBR2
TMEM131L	3.46762863440125e-37	0.325469553410945	0.349	0.105	1.16297329140549e-32	1-Naive	TMEM131L
BTF3	3.70808369319474e-37	0.276264340415688	0.994	0.987	1.24361710902365e-32	1-Naive	BTF3
RPL31	4.06144714313374e-37	0.283431917047778	0.994	0.992	1.3621281428642e-32	1-Naive	RPL31
BACH2	9.21765876743383e-37	0.474538915677839	0.786	0.505	3.09141839742196e-32	1-Naive	BACH2
SH3YL1	1.03360476048669e-36	0.309092975199706	0.31	0.088	3.46650364572026e-32	1-Naive	SH3YL1
TRABD2A	7.59394093113151e-36	0.272043478516335	0.242	0.056	2.54685590948289e-31	1-Naive	TRABD2A
CAMK4	9.31743851799101e-35	0.473708862992371	0.789	0.492	3.12488253016383e-30	1-Naive	CAMK4
CD27	8.52465848780442e-34	0.401923255229042	0.42	0.162	2.85899996363985e-29	1-Naive	CD27
CD7	9.28598772486461e-34	0.383111529702716	0.986	0.829	3.11433456316509e-29	1-Naive	CD7
TMEM243	1.288603157624e-33	0.446653104111991	0.749	0.453	4.32171727003936e-29	1-Naive	TMEM243
OXNAD1	6.96361140414965e-33	0.422691608555419	0.597	0.287	2.33545599272371e-28	1-Naive	OXNAD1
EIF3H	1.13885049809135e-32	0.373178815840231	0.935	0.816	3.81947680049878e-28	1-Naive	EIF3H
ATM	2.01601554003828e-32	0.372923318324349	0.479	0.2	6.76131291818038e-28	1-Naive	ATM
SCML1	7.95595458443605e-32	0.349737992342796	0.425	0.164	2.66826804852816e-27	1-Naive	SCML1
C19orf53	5.55022887551387e-31	0.386240733953388	0.887	0.681	1.86143576026984e-26	1-Naive	C19orf53
EIF3L	1.06882233064125e-30	0.360679991461653	0.913	0.812	3.58461633250461e-26	1-Naive	EIF3L
2006-09-01	2.27270448601761e-30	0.430378032535367	0.752	0.502	7.62219630520585e-26	1-Naive	2006-09-01
NKAP	5.61518393220208e-30	0.392846889137135	0.451	0.194	1.88322038718193e-25	1-Naive	NKAP
HSPH1	1.4867577778621e-29	0.483921652932049	0.839	0.652	4.98628823539391e-25	1-Naive	HSPH1
SLC44A2	1.72058673819116e-29	0.279214963473298	0.346	0.12	5.77050380254551e-25	1-Naive	SLC44A2
ARMH1	2.54676365012882e-29	0.338494081413377	0.425	0.169	8.54133592980204e-25	1-Naive	ARMH1
GIMAP4	9.59486000937538e-29	0.333651611751733	0.313	0.105	3.21792414994431e-24	1-Naive	GIMAP4
SMAP2	1.44501952348074e-28	0.419016884430434	0.625	0.363	4.84630647784971e-24	1-Naive	SMAP2
ST13	4.03053341077962e-28	0.389205921757927	0.823	0.577	1.35176029530727e-23	1-Naive	ST13
PLAC8	1.20361401205053e-27	0.290717379454703	0.423	0.168	4.03668067361508e-23	1-Naive	PLAC8
APEX1	8.16169945403899e-27	0.382786796682155	0.592	0.32	2.7372707628956e-22	1-Naive	APEX1
COX7C	1.75295671097833e-26	0.272354162516972	0.989	0.967	5.87906621727913e-22	1-Naive	COX7C
ETFRF1	2.64695214861906e-26	0.320929503287638	0.417	0.18	8.87734811603859e-22	1-Naive	ETFRF1
C12orf57	1.33185461119541e-25	0.332738927700439	0.938	0.868	4.46677399502717e-21	1-Naive	C12orf57
DGKA	1.69035737628203e-25	0.313965996306441	0.377	0.151	5.66912056857467e-21	1-Naive	DGKA
KLF2	1.85139543382824e-25	0.377284805560014	0.797	0.548	6.20921000597315e-21	1-Naive	KLF2
ATP5MC2	2.83210440585271e-25	0.328455996353282	0.966	0.86	9.4983117563488e-21	1-Naive	ATP5MC2
CMSS1	2.92791039855654e-25	0.272901027328454	0.338	0.126	9.81962589467893e-21	1-Naive	CMSS1
PRMT2	5.52847738773773e-25	0.402697060042876	0.721	0.461	1.85414074629948e-20	1-Naive	PRMT2
ANKRD12	6.26873347254499e-25	0.420034480802254	0.93	0.829	2.10240783202214e-20	1-Naive	ANKRD12
ALKBH7	4.43630860851833e-24	0.369359167350488	0.608	0.347	1.48784918112488e-19	1-Naive	ALKBH7
PCSK1N	6.98335466831153e-24	0.483989832181744	0.397	0.184	2.34207748865832e-19	1-Naive	PCSK1N
SFXN1	1.0521670750568e-23	0.335322387938679	0.49	0.241	3.52875793632549e-19	1-Naive	SFXN1
RASGRP2	1.05660543390177e-23	0.332319530504421	0.569	0.313	3.54364330421975e-19	1-Naive	RASGRP2
EXOC3	1.79195813277368e-23	0.300911445976443	0.299	0.112	6.00986918569636e-19	1-Naive	EXOC3
ARRDC2	2.53049423647283e-23	0.330175344523624	0.49	0.241	8.48677157028259e-19	1-Naive	ARRDC2
EIF2S3	5.02937657172779e-23	0.350675080412362	0.617	0.357	1.68675231462607e-18	1-Naive	EIF2S3
PDCD4	1.54033857216338e-22	0.343719422063486	0.941	0.877	5.16598750332153e-18	1-Naive	PDCD4
FYB1	1.73827705651054e-22	0.356476015966398	0.777	0.564	5.82983359212506e-18	1-Naive	FYB1
SNX9	1.9447381615011e-22	0.325357697829679	0.662	0.389	6.52226284604238e-18	1-Naive	SNX9
IKZF1	2.28876813487416e-22	0.367120854261054	0.555	0.304	7.67607057074095e-18	1-Naive	IKZF1
C6orf48	1.05531532180203e-21	0.326636227446767	0.6	0.342	3.53931652625965e-17	1-Naive	C6orf48
UQCRB	2.31877160192852e-21	0.264794574291437	0.977	0.951	7.77669619854788e-17	1-Naive	UQCRB
FAM118A	3.50890976009108e-21	0.383799101045958	0.775	0.551	1.17681815533935e-16	1-Naive	FAM118A
MAML2	6.53948634282986e-21	0.298226500623686	0.38	0.173	2.19321292965828e-16	1-Naive	MAML2
MSL3	1.00792374281851e-20	0.282416775909951	0.465	0.227	3.38037464866473e-16	1-Naive	MSL3
LEPROTL1	3.47366750124622e-20	0.299492255781	0.961	0.897	1.16499860656796e-15	1-Naive	LEPROTL1
JAK3	6.96910350511957e-20	0.257941299244101	0.259	0.097	2.337297933547e-15	1-Naive	JAK3
ANP32B	7.60842670540404e-20	0.3657100530841	0.752	0.557	2.55171414845841e-15	1-Naive	ANP32B
SF1	1.43448472547016e-19	0.272738510911257	0.966	0.895	4.81097487228182e-15	1-Naive	SF1
SMDT1	4.44490160102561e-19	0.311848990984023	0.848	0.654	1.49073109895197e-14	1-Naive	SMDT1
ID3	9.46257031675208e-19	0.255491820058883	0.161	0.044	3.17355683283231e-14	1-Naive	ID3
DOCK10	1.08011257948201e-18	0.308664627524219	0.577	0.348	3.62248156906676e-14	1-Naive	DOCK10
HPCAL4	1.12839093982267e-18	0.260824306131254	0.332	0.145	3.78439753397729e-14	1-Naive	HPCAL4
PELI1	2.04635391763396e-18	0.299133940329602	0.414	0.208	6.86306176896077e-14	1-Naive	PELI1
UXT	6.58538922338961e-18	0.282209381040317	0.882	0.71	2.20860783774041e-13	1-Naive	UXT
CYTIP	1.06148164011172e-17	0.327362588454928	0.887	0.776	3.55999712460669e-13	1-Naive	CYTIP
NSA2	1.2426220997311e-16	0.276514040861144	0.87	0.734	4.16750599807818e-12	1-Naive	NSA2
BEX4	2.36286084157153e-16	0.268880828480745	0.538	0.317	7.9245626904626e-12	1-Naive	BEX4
RHOH	4.71157337293979e-16	0.268864942873842	0.839	0.655	1.58016747781655e-11	1-Naive	RHOH
G3BP2	9.05662358879488e-16	0.331278660609288	0.823	0.684	3.03741041921003e-11	1-Naive	G3BP2
RSL1D1	9.16667166207784e-16	0.281151910617034	0.786	0.631	3.07431834202766e-11	1-Naive	RSL1D1
CD8B	1.48422663089406e-15	0.301799907279384	0.876	0.745	4.97779927469249e-11	1-Naive	CD8B
LTB	1.63349658461682e-15	0.272002529265593	0.814	0.634	5.47842084548788e-11	1-Naive	LTB
FBL	4.04799348548236e-15	0.289468635618812	0.761	0.569	1.35761605516107e-10	1-Naive	FBL
BIRC2	4.53129874524424e-15	0.279136361503017	0.738	0.537	1.51970697318001e-10	1-Naive	BIRC2
PIM2	1.2267251233396e-14	0.251775919343031	0.372	0.188	4.11419071865634e-10	1-Naive	PIM2
PHF20	1.40474878473351e-14	0.27148183544052	0.789	0.623	4.71124647423924e-10	1-Naive	PHF20
STAT3	2.09868769051394e-14	0.272800515290299	0.834	0.703	7.03857877644564e-10	1-Naive	STAT3
SECISBP2	2.50657155127785e-14	0.251017790478729	0.456	0.256	8.40653966867566e-10	1-Naive	SECISBP2
TCP11L2	2.58826611227955e-14	0.276009652430711	0.411	0.221	8.68052688736316e-10	1-Naive	TCP11L2
CLEC2D	2.62972577089239e-14	0.312582217773813	0.718	0.527	8.81957429041889e-10	1-Naive	CLEC2D
DCXR	3.18808494231615e-14	0.300890565539487	0.749	0.604	1.06921992795399e-09	1-Naive	DCXR
HIPK1	4.07716243819712e-14	0.265752149847166	0.541	0.347	1.36739873852255e-09	1-Naive	HIPK1
CD48	1.16375772731832e-13	0.277250476756118	0.837	0.686	3.90301066588019e-09	1-Naive	CD48
GYPC	4.05053980646941e-13	0.276881778239836	0.828	0.696	1.35847004029371e-08	1-Naive	GYPC
AP1M1	1.15027810044502e-12	0.269425420524599	0.479	0.304	3.85780269327251e-08	1-Naive	AP1M1
YBX3	4.25159112342857e-12	0.261305513285526	0.752	0.563	1.42589863097548e-07	1-Naive	YBX3
TUBA1A	5.19168296627546e-12	0.263108565310157	0.893	0.796	1.74118663322946e-07	1-Naive	TUBA1A
SC5D	5.8061622078723e-12	0.300717427420025	0.577	0.402	1.94727068127621e-07	1-Naive	SC5D
EVL	6.93117233146295e-12	0.28297503280524	0.701	0.518	2.32457657652604e-07	1-Naive	EVL
SAMHD1	7.22970728791797e-12	0.299102712342704	0.493	0.319	2.42469923022193e-07	1-Naive	SAMHD1
USP3	2.61144210106959e-11	0.286328218894109	0.589	0.433	8.75825451856719e-07	1-Naive	USP3
CYTH1	6.43340359374063e-11	0.258917669894809	0.786	0.632	2.15763489726873e-06	1-Naive	CYTH1
ALG13	3.80882535928539e-10	0.270781883436837	0.625	0.451	1.27740384899713e-05	1-Naive	ALG13
LINC02446	2.06007519947898e-09	0.417803623181309	0.696	0.604	6.9090802040126e-05	1-Naive	LINC02446
NKG7	9.15563182149171e-263	1.04150808630489	0.979	0.625	3.07061580029189e-258	2-Cytotoxic effectors	NKG7
LDHA	1.40106151464887e-237	0.649243958751669	1	0.976	4.69888010782939e-233	2-Cytotoxic effectors	LDHA
GZMK	1.36673193712766e-173	0.668929073467638	0.919	0.452	4.58374557073874e-169	2-Cytotoxic effectors	GZMK
CMC1	2.53376809044359e-146	0.653525754931183	0.559	0.135	8.49775142172972e-142	2-Cytotoxic effectors	CMC1
GZMH	3.90111158170989e-114	0.849679166379624	0.541	0.18	1.30835480227386e-109	2-Cytotoxic effectors	GZMH
CST7	3.29245670108227e-112	0.488822446182317	0.972	0.741	1.10422412840897e-107	2-Cytotoxic effectors	CST7
APOBEC3G	1.07634134175701e-110	0.570396775436667	0.864	0.527	3.60983359198465e-106	2-Cytotoxic effectors	APOBEC3G
GYG1	1.11410917666624e-107	0.554345461926792	0.832	0.509	3.73649935670325e-103	2-Cytotoxic effectors	GYG1
FGFBP2	2.46357339279969e-104	0.582075469592291	0.331	0.042	8.2623324447716e-100	2-Cytotoxic effectors	FGFBP2
ZEB2	1.43693376600645e-99	0.489173595304824	0.822	0.449	4.81918846443244e-95	2-Cytotoxic effectors	ZEB2
GZMM	1.88555486102879e-98	0.473323566583238	0.9	0.704	6.32377389291835e-94	2-Cytotoxic effectors	GZMM
FYN	9.29307163741957e-90	0.426016503501141	0.938	0.762	3.11671036575777e-85	2-Cytotoxic effectors	FYN
TUBA4A	4.19634769935728e-89	0.456622641185081	0.99	0.896	1.40737109141045e-84	2-Cytotoxic effectors	TUBA4A
TGFB1	4.73696527181275e-88	0.393041228200529	0.985	0.876	1.58868341286056e-83	2-Cytotoxic effectors	TGFB1
CD74	5.02509675498839e-87	0.407971009069366	0.987	0.9	1.68531694968801e-82	2-Cytotoxic effectors	CD74
CD8A	5.0816288831897e-86	0.343786942412139	0.987	0.949	1.70427669484416e-81	2-Cytotoxic effectors	CD8A
AUTS2	1.82983302419492e-78	0.373552346833295	0.369	0.093	6.13689399654494e-74	2-Cytotoxic effectors	AUTS2
DUSP2	4.85771804929407e-78	0.396933671047491	0.999	0.919	1.62918147937224e-73	2-Cytotoxic effectors	DUSP2
CXCR3	4.72347809199474e-73	0.434558949119809	0.877	0.604	1.5841600824932e-68	2-Cytotoxic effectors	CXCR3
S1PR5	1.53182067930848e-72	0.288653744287304	0.213	0.018	5.13742019426478e-68	2-Cytotoxic effectors	S1PR5
COL6A2	6.00933157362215e-72	0.412474500228487	0.31	0.07	2.0154096231614e-67	2-Cytotoxic effectors	COL6A2
C1orf21	5.41885536471091e-65	0.343179923322768	0.322	0.085	1.81737571221675e-60	2-Cytotoxic effectors	C1orf21
AKNA	1.0258988384851e-63	0.416257695930444	0.795	0.55	3.44065952451133e-59	2-Cytotoxic effectors	AKNA
GAPDH	2.00631887800115e-60	0.299818686754193	0.999	0.993	6.72879225304025e-56	2-Cytotoxic effectors	GAPDH
HLA-DRB1	1.51802294938547e-56	0.353887633069651	0.641	0.337	5.091145367649e-52	2-Cytotoxic effectors	HLA-DRB1
OASL	4.78191059331039e-56	0.356459696466836	0.867	0.588	1.60375717478444e-51	2-Cytotoxic effectors	OASL
KLRD1	4.27427832891986e-54	0.354141125673223	0.696	0.4	1.43350746595314e-49	2-Cytotoxic effectors	KLRD1
GPR183	2.74856335694779e-53	0.473152811777462	0.672	0.427	9.2181317865315e-49	2-Cytotoxic effectors	GPR183
ABI3	2.03737258328236e-52	0.291707326855432	0.292	0.086	6.83294016981238e-48	2-Cytotoxic effectors	ABI3
CCR71	1.66919144358699e-50	0.423990688609152	0.847	0.651	5.59813426350204e-46	2-Cytotoxic effectors	CCR7
CD6	3.10059193533585e-48	0.314081052184336	0.808	0.611	1.03987652327294e-43	2-Cytotoxic effectors	CD6
SLC7A5	1.27244984110043e-47	0.304922462123885	0.916	0.749	4.26754227708261e-43	2-Cytotoxic effectors	SLC7A5
NFATC2	2.17315151051627e-46	0.34289269839388	0.664	0.427	7.28831553596948e-42	2-Cytotoxic effectors	NFATC2
CXCR4	2.8022554038317e-46	0.266124335550424	0.996	0.967	9.39820417337076e-42	2-Cytotoxic effectors	CXCR4
VIM	2.29480406759785e-45	0.28095340200275	1	0.996	7.69631388190966e-41	2-Cytotoxic effectors	VIM
PPP1R14B	6.30039037676283e-44	0.271727890459877	0.216	0.053	2.11302492455872e-39	2-Cytotoxic effectors	PPP1R14B
CCL5	7.58918616589346e-44	0.288192367701277	0.999	0.79	2.54526125631735e-39	2-Cytotoxic effectors	CCL5
PRF1	5.93944980631167e-43	0.334418479702859	0.374	0.165	1.99197267604081e-38	2-Cytotoxic effectors	PRF1
YBX31	1.84978931186714e-42	0.330000091786684	0.725	0.473	6.20382339414002e-38	2-Cytotoxic effectors	YBX3
PSMA7	2.74280000733301e-41	0.280418717894329	0.923	0.826	9.19880266459343e-37	2-Cytotoxic effectors	PSMA7
EFHD2	6.25626984987636e-41	0.305427287594119	0.718	0.488	2.09822778225153e-36	2-Cytotoxic effectors	EFHD2
SELPLG	1.06420557890925e-40	0.327066208966585	0.677	0.457	3.56913267054585e-36	2-Cytotoxic effectors	SELPLG
APMAP	2.25968042875782e-39	0.301085009962018	0.756	0.539	7.57851622196797e-35	2-Cytotoxic effectors	APMAP
GZMA	6.29194545414043e-39	0.264463476521308	0.738	0.471	2.11019266640962e-34	2-Cytotoxic effectors	GZMA
GALNT11	5.283676054175e-38	0.283134667111753	0.451	0.234	1.77203927504921e-33	2-Cytotoxic effectors	GALNT11
TRMO	7.38786193876854e-37	0.256281390967197	0.328	0.139	2.47774113702419e-32	2-Cytotoxic effectors	TRMO
GTF3C1	1.32004479221537e-35	0.282994049284694	0.361	0.173	4.42716622413191e-31	2-Cytotoxic effectors	GTF3C1
ITGAV	3.0506069003876e-35	0.256074191430953	0.316	0.134	1.02311254225199e-30	2-Cytotoxic effectors	ITGAV
NAA50	4.38765652722804e-35	0.280040995568744	0.569	0.351	1.47153224610174e-30	2-Cytotoxic effectors	NAA50
FAM49A	5.26152401494564e-35	0.252139686794044	0.316	0.131	1.76460992413247e-30	2-Cytotoxic effectors	FAM49A
SURF4	2.68143650174457e-32	0.257469218494315	0.79	0.62	8.99300173955094e-28	2-Cytotoxic effectors	SURF4
CFLAR	4.25489566778853e-32	0.253227322460184	0.655	0.441	1.42700690906292e-27	2-Cytotoxic effectors	CFLAR
CCSER2	5.10012782128082e-30	0.280673087030015	0.688	0.495	1.71048086870116e-25	2-Cytotoxic effectors	CCSER2
PMEPA1	8.4901966669613e-30	0.258212766614326	0.477	0.277	2.84744215816548e-25	2-Cytotoxic effectors	PMEPA1
CLEC2B	1.54060391065426e-29	0.279029917737507	0.682	0.489	5.16687739555227e-25	2-Cytotoxic effectors	CLEC2B
RALGAPA1	2.18362484427387e-29	0.252457640708553	0.801	0.636	7.32344100272569e-25	2-Cytotoxic effectors	RALGAPA1
LPXN	5.55175762448386e-28	0.254201504947263	0.626	0.441	1.8619484720994e-23	2-Cytotoxic effectors	LPXN
PRKX	1.14706923400322e-27	0.252404442030746	0.614	0.416	3.84704079700001e-23	2-Cytotoxic effectors	PRKX
TRAT1	6.00917197627551e-26	0.259561332179528	0.662	0.471	2.01535609740328e-21	2-Cytotoxic effectors	TRAT1
GNLY	1.5188810865428e-22	0.492929324647241	0.145	0.046	5.09402338804723e-18	2-Cytotoxic effectors	GNLY
GLUL	1.05487206429261e-15	0.318777953264756	0.492	0.356	3.53782992922455e-11	2-Cytotoxic effectors	GLUL
ITGB1	1.31203669704856e-221	0.909131331751446	0.965	0.679	4.40030867456146e-217	3-Resident	ITGB1
LGALS1	3.96476082643568e-177	1.03099387468349	0.844	0.416	1.32970148597e-172	3-Resident	LGALS1
S100A11	4.49983490301655e-165	0.679328600784792	0.994	0.858	1.50915462977369e-160	3-Resident	S100A11
ZNF683	2.89861848042846e-163	0.639099884816043	0.496	0.078	9.72138665966098e-159	3-Resident	ZNF683
DUSP4	3.66305224761071e-156	0.842330983285296	0.897	0.543	1.22851446280368e-151	3-Resident	DUSP4
S100A10	3.18563081843535e-145	0.612263583904785	0.999	0.958	1.06839686388685e-140	3-Resident	S100A10
XCL1	3.76392919293048e-141	0.93124973304936	0.461	0.084	1.26234657272502e-136	3-Resident	XCL1
S100A6	2.23837360664674e-128	0.630378552941887	0.983	0.923	7.50705740197182e-124	3-Resident	S100A6
SAMSN1	6.96432214720934e-115	0.602050245721594	0.8	0.446	2.33569436173107e-110	3-Resident	SAMSN1
S100A4	2.34485723008254e-114	0.528542856126323	0.993	0.927	7.86418217825083e-110	3-Resident	S100A4
CRIP2	2.43507132557736e-106	0.650673271662102	0.526	0.178	8.16674221172134e-102	3-Resident	CRIP2
ZFP36L2	4.6361992420232e-103	0.440176498313719	0.997	0.986	1.55488850178974e-98	3-Resident	ZFP36L2
LINC01871	3.65382985509294e-99	0.680628044586243	0.714	0.402	1.22542145680107e-94	3-Resident	LINC01871
SLC16A3	1.26833478228052e-96	0.563110848829925	0.785	0.489	4.25374119281241e-92	3-Resident	SLC16A3
PHLDA1	1.20529259600364e-92	0.637300420232383	0.754	0.453	4.04231030847699e-88	3-Resident	PHLDA1
GNA15	1.42511550056355e-89	0.442861168314131	0.286	0.043	4.77955236579002e-85	3-Resident	GNA15
LMNA	3.82815334545539e-88	0.397219086614492	1	0.98	1.28388606899883e-83	3-Resident	LMNA
LGALS3	5.10687581143752e-88	0.526781278848108	0.422	0.127	1.71274400963991e-83	3-Resident	LGALS3
TIMP1	1.28731122224502e-87	0.541077653695892	0.62	0.307	4.31738437716533e-83	3-Resident	TIMP1
NCR3	5.41345637794533e-83	0.495253684999619	0.491	0.188	1.81556500003531e-78	3-Resident	NCR3
ATP1B1	2.85603323272575e-79	0.518517852228759	0.407	0.129	9.57856425591563e-75	3-Resident	ATP1B1
CDKN1A	1.56774128094368e-77	0.570098470143788	0.807	0.571	5.25789070802892e-73	3-Resident	CDKN1A
HOPX	4.04716550568353e-75	0.48118662798206	0.565	0.265	1.35733836729614e-70	3-Resident	HOPX
LDLRAD4	4.92486775597275e-70	0.575519661080212	0.591	0.299	1.65170214799814e-65	3-Resident	LDLRAD4
DUSP5	2.04717211825888e-67	0.489811672160867	0.508	0.241	6.86580585021664e-63	3-Resident	DUSP5
PRNP	7.85745810468192e-67	0.403685579921702	0.924	0.797	2.63523429914822e-62	3-Resident	PRNP
TACC1	2.88251851957578e-65	0.484890149985903	0.682	0.45	9.66739061095323e-61	3-Resident	TACC1
SRRT	1.43193458457313e-64	0.531677581623777	0.728	0.515	4.80242220974136e-60	3-Resident	SRRT
ANXA1	9.4845060159642e-63	0.318890369024806	0.998	0.994	3.18091362763407e-58	3-Resident	ANXA1
RGS1	2.30874706168362e-61	0.500508495355505	0.444	0.181	7.74307589547453e-57	3-Resident	RGS1
IL32	3.84338270069249e-58	0.403625352453218	0.964	0.915	1.28899369015825e-53	3-Resident	IL32
FXYD2	6.54525730745381e-58	0.423084323620659	0.357	0.128	2.19514839577386e-53	3-Resident	FXYD2
ANXA2	3.43929261919325e-57	0.412924313551915	0.854	0.656	1.15346995862503e-52	3-Resident	ANXA2
CD52	3.03143797448065e-56	0.336865108814056	0.986	0.965	1.01668366788132e-51	3-Resident	CD52
XCL2	7.0014735585197e-54	0.585922826789881	0.377	0.146	2.34815420205634e-49	3-Resident	XCL2
TXN	7.10753527143053e-51	0.497441663687577	0.736	0.544	2.38372517933237e-46	3-Resident	TXN
WEE1	2.38981082570555e-50	0.359498573103689	0.267	0.079	8.01494754725126e-46	3-Resident	WEE1
AHNAK	1.92031934849133e-47	0.355258176294973	0.979	0.893	6.44036703097022e-43	3-Resident	AHNAK
RBPJ	1.99113742615714e-46	0.415127652650233	0.64	0.452	6.6778766998458e-42	3-Resident	RBPJ
ZFP36	1.97651400741052e-44	0.290139799388005	0.998	0.995	6.62883267805341e-40	3-Resident	ZFP36
TPM3	2.22748335519341e-44	0.294896209334558	0.93	0.871	7.47053367664765e-40	3-Resident	TPM3
EMP3	2.73611385090042e-44	0.313596804777835	0.953	0.892	9.17637863314982e-40	3-Resident	EMP3
CLU	3.41519459073954e-44	0.343789417146826	0.356	0.156	1.14538796184223e-39	3-Resident	CLU
JPT1	1.9969414055747e-43	0.336719409134409	0.793	0.636	6.69734208601642e-39	3-Resident	JPT1
MYL12B	8.2257142116672e-43	0.262600670574083	0.961	0.927	2.75874003230894e-38	3-Resident	MYL12B
MYL12A	2.99054614815533e-42	0.339558988487444	0.888	0.79	1.00296936716834e-37	3-Resident	MYL12A
PLP2	1.72757580903246e-40	0.313760980184302	0.886	0.784	5.79394374833306e-36	3-Resident	PLP2
NR3C1	1.98406577053207e-40	0.272846974896089	0.915	0.824	6.65415978121046e-36	3-Resident	NR3C1
PLAUR	1.26338169024983e-39	0.366526293003039	0.472	0.269	4.23712951275989e-35	3-Resident	PLAUR
CAST	3.37446602976501e-39	0.354250007090684	0.77	0.627	1.13172841706259e-34	3-Resident	CAST
TSPAN2	1.16557720637137e-38	0.33792289588448	0.396	0.204	3.9091128347283e-34	3-Resident	TSPAN2
GALNT6	2.31652696580516e-36	0.319784209137607	0.403	0.218	7.76916813791734e-32	3-Resident	GALNT6
IL5RA	1.30958314992519e-35	0.322520626663146	0.437	0.245	4.39207996821911e-31	3-Resident	IL5RA
IL10RA	1.32724875975931e-35	0.349884570624243	0.705	0.569	4.45132689048078e-31	3-Resident	IL10RA
TPI1	2.15630183607089e-35	0.295367896393188	0.85	0.736	7.23180509781454e-31	3-Resident	TPI1
MT2A	1.33514205910326e-32	0.384286347122857	0.817	0.678	4.47779943782053e-28	3-Resident	MT2A
ITM2C	2.31372459287281e-32	0.310572974351811	0.376	0.202	7.75976953957683e-28	3-Resident	ITM2C
FAM129A	7.02205766998001e-32	0.283096241109203	0.737	0.569	2.3550577013579e-27	3-Resident	FAM129A
2011-09-01	1.08216288343112e-31	0.312692133303721	0.49	0.324	3.6293578784513e-27	3-Resident	2011-09-01
YWHAQ	1.27073868579082e-31	0.253168952605135	0.955	0.907	4.26180340440526e-27	3-Resident	YWHAQ
NPDC1	7.70519407438669e-31	0.315995175717962	0.499	0.335	2.58416798866781e-26	3-Resident	NPDC1
SOD2	8.04665066466968e-31	0.321351185746437	0.642	0.491	2.69868569991692e-26	3-Resident	SOD2
ID2	2.12496794195014e-29	0.321168363529838	0.699	0.532	7.12671748371236e-25	3-Resident	ID2
LTB1	7.31054200145999e-29	0.274167984774535	0.764	0.604	2.45180957644965e-24	3-Resident	LTB
ANXA5	2.62008692408873e-28	0.291142123777561	0.598	0.434	8.78724752600878e-24	3-Resident	ANXA5
SPTAN1	9.45280475982697e-28	0.274713583344138	0.714	0.574	3.17028166035077e-23	3-Resident	SPTAN1
TNFRSF1B	2.65821559081882e-27	0.250340003689409	0.849	0.747	8.91512344848817e-23	3-Resident	TNFRSF1B
TRMT6	4.43268571118666e-27	0.323935652928352	0.48	0.327	1.48663413381778e-22	3-Resident	TRMT6
CLIC1	7.62357813127149e-27	0.272759842922597	0.835	0.746	2.55679563366583e-22	3-Resident	CLIC1
ZYX	1.19672159618344e-26	0.271805067826917	0.623	0.48	4.01356488928003e-22	3-Resident	ZYX
PDCL3	8.83262077989207e-26	0.311515688556877	0.481	0.339	2.9622843571602e-21	3-Resident	PDCL3
BHLHE40	1.16815381118e-25	0.307189993000211	0.675	0.529	3.91775425193549e-21	3-Resident	BHLHE40
GLRX	3.83940348038736e-24	0.318059540063897	0.422	0.28	1.28765913925231e-19	3-Resident	GLRX
RILPL2	1.23348550045842e-23	0.257435345268795	0.734	0.609	4.13686367143744e-19	3-Resident	RILPL2
NDUFV2	2.41198879572631e-23	0.254267521217844	0.738	0.646	8.0893280231069e-19	3-Resident	NDUFV2
IL2RB	3.04338045143158e-23	0.281925401531461	0.52	0.389	1.02068893580112e-18	3-Resident	IL2RB
S1PR1	2.36434053005217e-21	0.25932274806772	0.693	0.609	7.92952526968896e-17	3-Resident	S1PR1
ACTN4	2.56045124910459e-21	0.264022721401424	0.536	0.405	8.58724139924699e-17	3-Resident	ACTN4
TMX4	1.7410624596342e-18	0.257658503895888	0.574	0.461	5.83917527712119e-14	3-Resident	TMX4
TUBB2A	3.61768987159099e-17	0.258171251841658	0.497	0.382	1.21330082913419e-12	3-Resident	TUBB2A
GZMB	3.10527318046897e-15	0.349285358579616	0.276	0.165	1.04144651926568e-10	3-Resident	GZMB
HSPA1B	7.1336173982763e-94	2.03063132861316	0.511	0.089	2.3924726030339e-89	4-Activated	HSPA1B
NR4A2	1.19000691317664e-70	1.4360510863758	0.974	0.849	3.99104518541181e-66	4-Activated	NR4A2
EGR1	1.35367635156941e-69	0.629725514835496	0.268	0.026	4.53995974789348e-65	4-Activated	EGR1
EIF1	6.73963200312341e-65	0.502793769584715	1	1	2.26033778120753e-60	4-Activated	EIF1
CCL4	3.67884162999356e-64	2.43085101958436	0.447	0.095	1.23380990586724e-59	4-Activated	CCL4
HSPA1A	3.45410785114897e-63	1.89957552691427	0.379	0.069	1.15843869111834e-58	4-Activated	HSPA1A
JUN	8.25328405380262e-62	1.3803627535931	0.949	0.797	2.76798640596432e-57	4-Activated	JUN
NR4A1	5.96577777565177e-61	1.27192652936919	0.566	0.159	2.00080255039809e-56	4-Activated	NR4A1
CD69	1.66634798206494e-59	1.40528503097148	0.923	0.663	5.5885978622494e-55	4-Activated	CD69
KLF6	2.98711637044444e-58	1.07909014946404	1	0.954	1.00181908831965e-53	4-Activated	KLF6
TNF	3.94913054532582e-58	1.54740270398556	0.417	0.088	1.32445940229137e-53	4-Activated	TNF
FOSB	1.95966441199257e-57	0.941325421775786	0.962	0.783	6.57232250494069e-53	4-Activated	FOSB
DNAJA1	9.43676801123319e-54	0.857054592327868	0.945	0.726	3.16490325560739e-49	4-Activated	DNAJA1
CCL4L2	8.65242173582642e-53	0.423912373628337	0.123	0.005	2.90184920176146e-48	4-Activated	CCL4L2
TNFAIP3	1.63528514995855e-52	0.799924108962069	1	0.989	5.48441933593097e-48	4-Activated	TNFAIP3
JUNB	7.24427929804139e-50	0.916538133151094	0.987	0.886	2.42958639097712e-45	4-Activated	JUNB
NFKBIA	1.68894798257048e-49	1.03925789060154	0.889	0.683	5.66439374394487e-45	4-Activated	NFKBIA
NFKBID	4.25706619008572e-49	0.590283793384358	0.306	0.053	1.42773485883095e-44	4-Activated	NFKBID
DUSP1	3.18799059088534e-48	0.892867770311765	0.966	0.881	1.06918828437112e-43	4-Activated	DUSP1
TNFSF9	5.42709491952114e-48	1.25368598201937	0.46	0.133	1.820139094109e-43	4-Activated	TNFSF9
TXNIP	2.95928699541455e-44	0.837298503215542	0.451	0.132	9.92485672522131e-40	4-Activated	TXNIP
DNAJB1	2.98266561916081e-42	0.949065192435538	0.898	0.701	1.00032639535415e-37	4-Activated	DNAJB1
PPP1R15A	2.67493119128852e-40	0.781379317707662	0.932	0.809	8.97118422934343e-36	4-Activated	PPP1R15A
H3F3B	3.20687206606389e-40	0.433834209079306	1	0.999	1.07552075351651e-35	4-Activated	H3F3B
RHOB	7.99542784857506e-40	0.700667168967682	0.374	0.098	2.6815065918551e-35	4-Activated	RHOB
SBDS	9.18950258205606e-37	0.613448734533691	0.83	0.527	3.08197537596996e-32	4-Activated	SBDS
SH3BP1	5.99485438377594e-36	0.251985696959396	0.213	0.033	2.01055426323077e-31	4-Activated	SH3BP1
CD83	7.56482109441004e-35	0.563095412247663	0.353	0.095	2.53708969864324e-30	4-Activated	CD83
TSC22D3	9.87156181964326e-35	0.491354729746172	0.983	0.993	3.31072440307196e-30	4-Activated	TSC22D3
BTG2	1.15730424737568e-31	0.783280585450935	0.787	0.537	3.88136698484854e-27	4-Activated	BTG2
RASGEF1B	1.44854152287236e-30	0.651527620479618	0.383	0.127	4.85811855940933e-26	4-Activated	RASGEF1B
NFKBIZ	2.11253347923485e-30	0.627720493482803	0.485	0.193	7.08501478265783e-26	4-Activated	NFKBIZ
KLF9	1.64268421498081e-29	0.281588577074497	0.217	0.043	5.50923432020263e-25	4-Activated	KLF9
REL	2.50236955794404e-29	0.508869994982946	0.911	0.772	8.39244702343272e-25	4-Activated	REL
STK17B	5.33575851232965e-28	0.491515072372261	0.915	0.735	1.78950668986512e-23	4-Activated	STK17B
RCSD1	3.18797807199101e-27	0.294225526875114	0.277	0.072	1.06918408578434e-22	4-Activated	RCSD1
CCNL1	1.14626875302181e-26	0.637332713617311	0.826	0.624	3.84435614388454e-22	4-Activated	CCNL1
ARL5B	2.77704752608167e-26	0.33307272082232	0.289	0.081	9.31366199297271e-22	4-Activated	ARL5B
PER1	6.17699806757397e-26	0.572035289180923	0.766	0.536	2.07164161190296e-21	4-Activated	PER1
PLEK	2.03606548008846e-25	0.304598152178797	0.145	0.022	6.82855640712068e-21	4-Activated	PLEK
RSRC2	5.84359966498663e-25	0.487637824637723	0.817	0.59	1.95982645564322e-20	4-Activated	RSRC2
IFNG	7.99191523664352e-25	1.1302134208266	0.489	0.217	2.68032853206551e-20	4-Activated	IFNG
GADD45B	4.21534366385047e-24	0.65157524938556	0.932	0.822	1.41374195798217e-19	4-Activated	GADD45B
FAM53C	7.65949375774626e-24	0.4677360218886	0.374	0.139	2.56884101647294e-19	4-Activated	FAM53C
FOS	1.47249516436237e-23	0.840379800753694	0.983	0.968	4.93845428223853e-19	4-Activated	FOS
MAFF	1.70781938472714e-23	0.355554499410498	0.264	0.076	5.72768465249788e-19	4-Activated	MAFF
NR4A3	1.9843881837214e-23	0.636215760567468	0.766	0.525	6.65524109056482e-19	4-Activated	NR4A3
GBP5	3.62997440705054e-23	0.416254718196974	0.37	0.138	1.21742081663661e-18	4-Activated	GBP5
LY9	5.18344627356192e-23	0.28514033130391	0.294	0.09	1.7384242112272e-18	4-Activated	LY9
ZFAND5	1.02253314385766e-21	0.47672382503906	0.719	0.467	3.4293716578698e-17	4-Activated	ZFAND5
SLC2A3	1.18783253486783e-21	0.463445733359864	0.957	0.908	3.98375275543974e-17	4-Activated	SLC2A3
IER2	1.25300580119249e-21	0.564604349772955	0.94	0.839	4.20233085603936e-17	4-Activated	IER2
ELF1	2.38410767904221e-21	0.529597181723406	0.8	0.613	7.99582033397176e-17	4-Activated	ELF1
EIF4A2	3.06332033266653e-21	0.493912658083388	0.881	0.73	1.0273763731697e-16	4-Activated	EIF4A2
IER3	3.46840972233166e-21	0.274494297903007	0.157	0.032	1.16323525267559e-16	4-Activated	IER3
MYLIP	8.8210228905963e-21	0.451047082526721	0.587	0.335	2.95839465704819e-16	4-Activated	MYLIP
RIPOR2	9.69703136091553e-21	0.420255696065946	0.643	0.356	3.25219037782385e-16	4-Activated	RIPOR2
KLRG1	1.04643781982405e-20	0.456958971237133	0.532	0.269	3.5095431601259e-16	4-Activated	KLRG1
UBE2S	1.35867806082616e-20	0.446509621449019	0.477	0.228	4.55673448039877e-16	4-Activated	UBE2S
ZFP36L1	1.4388182042314e-20	0.758306129128973	0.864	0.683	4.82550849335127e-16	4-Activated	ZFP36L1
ID21	1.50944790595748e-20	0.507559429097673	0.817	0.566	5.0623863870002e-16	4-Activated	ID2
NEU1	2.35086042010711e-20	0.901788232631318	0.626	0.401	7.88431567695521e-16	4-Activated	NEU1
CCL51	3.5073260247705e-20	0.361463969267533	0.974	0.874	1.17628700218753e-15	4-Activated	CCL5
TSC22D2	4.21428544395654e-20	0.451399349106694	0.443	0.208	1.41338705219414e-15	4-Activated	TSC22D2
EIF5	2.23733788184764e-19	0.402433996373206	0.932	0.804	7.50358378814063e-15	4-Activated	EIF5
IRF1	3.26019686163608e-19	0.483596975583697	0.838	0.678	1.09340482345551e-14	4-Activated	IRF1
FYB11	4.81095338267945e-19	0.407592189288072	0.809	0.57	1.61349754548304e-14	4-Activated	FYB1
LCP2	5.68262457097971e-19	0.368417179611137	0.447	0.208	1.90583862861517e-14	4-Activated	LCP2
ICOS	8.17900149431256e-19	0.381457766808093	0.226	0.067	2.74307352116255e-14	4-Activated	ICOS
MAP3K8	1.04178730269504e-18	0.509083928111625	0.579	0.32	3.49394625577863e-14	4-Activated	MAP3K8
BRD2	1.23271556497691e-18	0.501006088005142	0.906	0.798	4.13428146181956e-14	4-Activated	BRD2
TAGAP	1.88504712487127e-18	0.478389153026202	0.826	0.665	6.32207104739326e-14	4-Activated	TAGAP
CCND3	2.97573870344847e-18	0.396029825897019	0.604	0.352	9.98003246362546e-14	4-Activated	CCND3
PNRC1	4.44830836957414e-18	0.490839310077401	0.936	0.889	1.49187366098777e-13	4-Activated	PNRC1
PIM21	1.07321406142536e-17	0.364168223588947	0.421	0.191	3.59934531920836e-13	4-Activated	PIM2
SRSF7	1.91473351862417e-17	0.434150353315774	0.962	0.965	6.42163327476175e-13	4-Activated	SRSF7
TFRC	2.05197729924817e-17	0.278101762468655	0.294	0.108	6.88192146621851e-13	4-Activated	TFRC
ATF3	2.29975939109878e-17	0.434059944555067	0.272	0.096	7.71293304586709e-13	4-Activated	ATF3
GTF2B	2.33464586694357e-17	0.450923346745682	0.723	0.534	7.82993530855534e-13	4-Activated	GTF2B
RASSF1	6.00581787896523e-17	0.334701832897587	0.455	0.225	2.01423120024736e-12	4-Activated	RASSF1
VSIR	1.07775035737241e-16	0.46834076451014	0.519	0.293	3.61455914855558e-12	4-Activated	VSIR
CMC11	1.22021481091022e-16	0.496147714870687	0.549	0.304	4.0923564328307e-12	4-Activated	CMC1
PFN1	2.09952198476003e-16	0.285924011892658	0.974	0.966	7.0413768324882e-12	4-Activated	PFN1
PMAIP1	2.50760216003092e-16	0.442414573131548	0.391	0.186	8.40999612431171e-12	4-Activated	PMAIP1
LINC00861	3.25774341123672e-16	0.266695507814157	0.285	0.106	1.09258198526057e-11	4-Activated	LINC00861
BCLAF1	4.15167849710529e-16	0.410375578058317	0.855	0.717	1.39238993435917e-11	4-Activated	BCLAF1
IFRD1	8.48285656429644e-16	0.557815470748662	0.723	0.556	2.84498043453374e-11	4-Activated	IFRD1
HELB	1.18108679452633e-15	0.256286414360141	0.281	0.106	3.96112889148241e-11	4-Activated	HELB
CRTAM	4.30452038873115e-15	0.341732115074452	0.209	0.067	1.44365004797265e-10	4-Activated	CRTAM
ATF4	4.73492783350832e-15	0.395803316681433	0.609	0.391	1.58800009680202e-10	4-Activated	ATF4
PPP1R15B	5.8403668095409e-15	0.357550600567237	0.379	0.183	1.95874222058383e-10	4-Activated	PPP1R15B
AL118516.1	6.09265196512435e-15	0.374509752786342	0.43	0.211	2.0433536160634e-10	4-Activated	AL118516.1
CSRNP1	7.30801345452406e-15	0.283362755120652	0.906	0.814	2.45096155237828e-10	4-Activated	CSRNP1
ZBTB10	7.61292251698241e-15	0.264142757034527	0.191	0.059	2.55322195374556e-10	4-Activated	ZBTB10
KDM2A	1.15400890900374e-14	0.362638235815989	0.655	0.47	3.87031507901674e-10	4-Activated	KDM2A
DNAJB6	1.43392410652812e-14	0.333286819449598	0.847	0.771	4.80909466847399e-10	4-Activated	DNAJB6
ZFAS1	1.63371376950601e-14	0.378898679334991	0.932	0.873	5.47914924016925e-10	4-Activated	ZFAS1
ETV3	2.58515131372639e-14	0.336595236816974	0.404	0.2	8.67008047597558e-10	4-Activated	ETV3
RBM39	4.14552483923744e-14	0.325823873654376	0.936	0.871	1.39032612058345e-09	4-Activated	RBM39
ATP2B1-AS1	6.22397625772443e-14	0.28375153457427	0.277	0.112	2.08739715731562e-09	4-Activated	ATP2B1-AS1
BTG3	9.99182045406332e-14	0.301577775699582	0.413	0.213	3.35105674388376e-09	4-Activated	BTG3
NXT1	1.30185257129676e-13	0.278425678503365	0.447	0.234	4.36615315361507e-09	4-Activated	NXT1
SYNRG	1.69079079540267e-13	0.265454403677937	0.289	0.121	5.67057416962148e-09	4-Activated	SYNRG
NKG71	2.06475658949803e-13	0.362676949868159	0.919	0.77	6.92478064985848e-09	4-Activated	NKG7
IER5	2.41361500689724e-13	0.274656296328039	0.315	0.14	8.09478201013198e-09	4-Activated	IER5
SNHG15	2.41560510369976e-13	0.346441333784774	0.596	0.403	8.10145639678825e-09	4-Activated	SNHG15
DNAJB9	4.914329650696e-13	0.305041532284963	0.655	0.439	1.64816787825043e-08	4-Activated	DNAJB9
SERTAD1	5.67567804234382e-13	0.356534711587055	0.723	0.54	1.90350890184127e-08	4-Activated	SERTAD1
TRA2B	6.00223468483009e-13	0.438478809936484	0.719	0.561	2.01302946859831e-08	4-Activated	TRA2B
SPTY2D1	6.99635883610403e-13	0.326460137120187	0.434	0.241	2.34643882645257e-08	4-Activated	SPTY2D1
HSPA5	7.56328727378413e-13	0.361002791051136	0.974	0.976	2.53657528588172e-08	4-Activated	HSPA5
NAF1	9.11550168402251e-13	0.261204845716871	0.302	0.136	3.05715695478747e-08	4-Activated	NAF1
KLF21	1.1111350612064e-12	0.726359481282695	0.728	0.563	3.72652476827402e-08	4-Activated	KLF2
CCDC59	1.2788947339387e-12	0.303802729222607	0.553	0.349	4.28915715868361e-08	4-Activated	CCDC59
ZC3H12A	1.44468748577454e-12	0.404384893087203	0.6	0.415	4.84519288979064e-08	4-Activated	ZC3H12A
LAMTOR4	1.68920994376448e-12	0.30483209217676	0.468	0.272	5.66527230939732e-08	4-Activated	LAMTOR4
SRSF5	2.38140997338362e-12	0.296347040920699	0.945	0.891	7.98677276873399e-08	4-Activated	SRSF5
SMAD7	3.20452537379101e-12	0.313105977002789	0.443	0.246	1.07473371986203e-07	4-Activated	SMAD7
NR1D2	3.57457469405826e-12	0.256135090393526	0.464	0.252	1.19884086089326e-07	4-Activated	NR1D2
HSP90AA1	4.12393709548222e-12	0.326459967626685	0.949	0.955	1.38308602308283e-07	4-Activated	HSP90AA1
CYCS	5.61184352453994e-12	0.314162460468486	0.86	0.736	1.8821000812602e-07	4-Activated	CYCS
ID1	5.7151331717078e-12	0.292112640824022	0.187	0.066	1.91674136312736e-07	4-Activated	ID1
CTSC	6.27795470121465e-12	0.317425927814272	0.421	0.228	2.10550044769337e-07	4-Activated	CTSC
CDC42EP3	7.74497289884626e-12	0.303624048057496	0.519	0.315	2.59750901081506e-07	4-Activated	CDC42EP3
RAC2	8.84330577374538e-12	0.317192938501734	0.834	0.708	2.96586789039873e-07	4-Activated	RAC2
GZMA1	1.86605859562798e-11	0.315202214350512	0.77	0.574	6.25838731801711e-07	4-Activated	GZMA
HERPUD1	2.06953668865461e-11	0.332549997897123	0.847	0.709	6.94081214640982e-07	4-Activated	HERPUD1
LY6E	2.41458120778277e-11	0.306335861518241	0.74	0.576	8.09802245466185e-07	4-Activated	LY6E
DNAAF2	3.51958900931102e-11	0.345112196880902	0.421	0.243	1.18039976194273e-06	4-Activated	DNAAF2
S100A41	6.13053423637273e-11	0.267120058712351	0.979	0.945	2.05605857219469e-06	4-Activated	S100A4
C16orf72	6.87934622675798e-11	0.292594228831914	0.443	0.265	2.30719513753009e-06	4-Activated	C16orf72
DDX3Y	1.00700008566136e-10	0.312733436757091	0.732	0.567	3.37727688729107e-06	4-Activated	DDX3Y
VAMP2	1.01323627016174e-10	0.295818208042493	0.477	0.294	3.39819180286844e-06	4-Activated	VAMP2
MEF2D	1.63228880231094e-10	0.265156802540892	0.357	0.191	5.47437018519042e-06	4-Activated	MEF2D
ITGAL	1.82435095077497e-10	0.290029280572594	0.46	0.271	6.11850821870908e-06	4-Activated	ITGAL
DDIT3	1.86268001831327e-10	0.308014398155527	0.506	0.332	6.24705624541904e-06	4-Activated	DDIT3
GZMK1	2.0688111469766e-10	0.363846812630957	0.783	0.648	6.93837882473013e-06	4-Activated	GZMK
BIN2	2.61523504074031e-10	0.274139437078128	0.557	0.364	8.77097527963485e-06	4-Activated	BIN2
OSER1	2.9938713201003e-10	0.258370673390172	0.498	0.316	1.00408456333524e-05	4-Activated	OSER1
CMC2	3.49920917905714e-10	0.265008087144026	0.583	0.384	1.17356477447218e-05	4-Activated	CMC2
AREG	4.10316607620136e-10	0.401048361105638	0.413	0.241	1.37611983863641e-05	4-Activated	AREG
JMJD6	4.30535192706363e-10	0.304620198400099	0.774	0.644	1.4439289292986e-05	4-Activated	JMJD6
KMT2E	4.61515091225413e-10	0.273489020832878	0.915	0.859	1.54782931295179e-05	4-Activated	KMT2E
CHMP1B	5.41602652530255e-10	0.316898526061167	0.706	0.535	1.81642697605597e-05	4-Activated	CHMP1B
WDR33	8.27933451377111e-10	0.259057868069528	0.583	0.403	2.77672320922856e-05	4-Activated	WDR33
ARHGAP15	1.83283718756447e-09	0.28675287987826	0.74	0.608	6.14696935965373e-05	4-Activated	ARHGAP15
EIF4A3	2.11560229703023e-09	0.267813514101568	0.762	0.64	7.09530698378e-05	4-Activated	EIF4A3
DDX3X	2.7184738681906e-09	0.368854811989766	0.817	0.686	9.11721765913763e-05	4-Activated	DDX3X
SCML4	2.96133160741248e-09	0.310567242114448	0.383	0.225	9.93171394493996e-05	4-Activated	SCML4
H2AFX	3.05694890076861e-09	0.324286241254636	0.574	0.425	0.000102523952233978	4-Activated	H2AFX
RGS2	3.63704470019851e-09	0.427063781480376	0.468	0.3	0.000121979205155258	4-Activated	RGS2
RPL22L1	4.5358769009743e-09	0.326190983473943	0.749	0.63	0.000152124239504876	4-Activated	RPL22L1
ENC1	7.39748144997129e-09	0.288743800479372	0.255	0.127	0.000248096732869137	4-Activated	ENC1
BCAS2	8.50909866722835e-09	0.271422794991518	0.672	0.547	0.000285378151101504	4-Activated	BCAS2
KMT2E-AS1	8.76546132438222e-09	0.26465493102011	0.328	0.183	0.000293976041897131	4-Activated	KMT2E-AS1
CKS2	1.05566078395695e-08	0.303534949479275	0.374	0.221	0.00035404751372348	4-Activated	CKS2
RAB8B	1.09289271544674e-08	0.255608250246717	0.485	0.322	0.000366534358906527	4-Activated	RAB8B
SLC1A5	1.30650700006328e-08	0.266295629825261	0.455	0.298	0.000438176317681224	4-Activated	SLC1A5
NFKBIB	1.62770185233722e-08	0.263037642769591	0.383	0.229	0.000545898647236855	4-Activated	NFKBIB
CCNH	1.69604695608109e-08	0.287423842921871	0.63	0.489	0.000568820228130475	4-Activated	CCNH
BHLHE401	2.01995193748822e-08	0.294266779040238	0.719	0.563	0.000677451480794799	4-Activated	BHLHE40
ACTB	2.1254724636189e-08	0.284843779184911	1	0.999	0.000712840954848508	4-Activated	ACTB
EVL1	5.61753476497369e-08	0.254826735710067	0.681	0.527	0.00188400880947687	4-Activated	EVL
TERF2IP	5.82905428533582e-08	0.253482976558878	0.728	0.589	0.00195494822621593	4-Activated	TERF2IP
HBP1	8.39489543144473e-08	0.307314891335416	0.609	0.487	0.00281548002979793	4-Activated	HBP1
SLC38A2	2.8126406636335e-07	0.273353001690903	0.698	0.59	0.00943303425769404	4-Activated	SLC38A2
CITED2	4.98293488688384e-07	0.347936218906545	0.626	0.471	0.016711767023631	4-Activated	CITED2
ISG20L2	5.26806198478516e-07	0.284431112352287	0.4	0.273	0.0176680262845725	4-Activated	ISG20L2
HSPB1	6.6811697449826e-07	0.264601597704658	0.438	0.298	0.0224073070907226	4-Activated	HSPB1
CLK1	7.42359441271358e-07	0.254897320088922	0.791	0.726	0.0248972509413588	4-Activated	CLK1
TOB1	1.71589108459574e-06	0.26366700203639	0.715	0.587	0.0575475551951718	4-Activated	TOB1
ZC3HAV1	4.4142355476599e-06	0.324940268648678	0.685	0.615	0.148044631797418	4-Activated	ZC3HAV1
SLA	4.71024609413827e-06	0.376348356059539	0.638	0.546	0.157972233505209	4-Activated	SLA
RSRP1	1.09623437042306e-05	0.318514729005551	0.732	0.652	0.367655083152486	4-Activated	RSRP1
SRSF3	1.14067529725305e-05	0.321776079311141	0.851	0.847	0.382559681192728	4-Activated	SRSF3
SNHG12	2.26876045035522e-05	0.358720225260958	0.587	0.507	0.760896879840134	4-Activated	SNHG12
NAMPT	3.36915839294346e-05	0.283095165555025	0.506	0.369	1	4-Activated	NAMPT
AC020916.1	3.80237819404069e-05	0.355697297299835	0.481	0.37	1	4-Activated	AC020916.1
BCL2A1	4.19614069767612e-05	0.354025356279956	0.34	0.243	1	4-Activated	BCL2A1
XCL21	4.19888833122735e-05	0.607659444799276	0.311	0.21	1	4-Activated	XCL2
RHOH1	0.000891524261158129	0.273544623543359	0.723	0.672	1	4-Activated	RHOH
LST1	0.000968335656515222	0.613170668425539	0.162	0.098	1	4-Activated	LST1
GNLY1	0.00102810720515651	0.293170408679835	0.149	0.085	1	4-Activated	GNLY
ZNF6831	0.00611559380630615	0.259114740875868	0.268	0.203	1	4-Activated	ZNF683
NEFL	5.78145166803416e-157	0.616594779468334	0.318	0.004	1.9389832604253e-152	5-Helper-like	NEFL
CCR4	2.54375680070256e-154	1.14194014883647	0.764	0.061	8.53125155819626e-150	5-Helper-like	CCR4
SESN31	1.21621248818363e-119	1.36442611736419	0.864	0.12	4.07893344287024e-115	5-Helper-like	SESN3
CD40LG	2.66268971847156e-98	0.505430060025549	0.273	0.008	8.93012877780992e-94	5-Helper-like	CD40LG
KLRB1	1.92881450982773e-67	0.743115114733218	0.291	0.018	6.46885810306023e-63	5-Helper-like	KLRB1
MLF1	1.70014364232688e-63	0.582873321400448	0.4	0.04	5.70194174763589e-59	5-Helper-like	MLF1
CYSLTR1	1.51099674612703e-61	0.379142096922559	0.218	0.01	5.06758088716083e-57	5-Helper-like	CYSLTR1
MAF	5.99537712576237e-57	0.31595012398035	0.218	0.011	2.01072958043818e-52	5-Helper-like	MAF
CMTM8	1.52377512867456e-54	0.47029668429086	0.345	0.034	5.11043702654875e-50	5-Helper-like	CMTM8
ARID5B	4.68111075819938e-51	0.964753322132576	0.8	0.221	1.56995092608491e-46	5-Helper-like	ARID5B
CCR8	2.59284715354999e-50	0.418138384934904	0.191	0.01	8.69589078357596e-46	5-Helper-like	CCR8
PASK1	2.31525018507458e-43	0.858776896808934	0.655	0.171	7.76488607070313e-39	5-Helper-like	PASK
TNFRSF4	2.12963228491805e-40	0.841915354212548	0.464	0.09	7.14236075715814e-36	5-Helper-like	TNFRSF4
WNT7A	4.18545069251636e-39	0.253320065022664	0.209	0.017	1.40371645325614e-34	5-Helper-like	WNT7A
AP3M2	2.80784022833113e-36	0.601206081875274	0.7	0.2	9.41693455777694e-32	5-Helper-like	AP3M2
ID31	2.21545658297839e-35	0.605302597258048	0.327	0.048	7.43019828799292e-31	5-Helper-like	ID3
NR3C11	9.17372574793924e-35	0.83547625427776	0.991	0.847	3.07668414134386e-30	5-Helper-like	NR3C1
S1PR11	4.39235143561632e-30	0.779472881592013	0.927	0.625	1.473106824477e-25	5-Helper-like	S1PR1
FGL2	1.13669633895293e-29	0.333384034576082	0.173	0.015	3.81225218158032e-25	5-Helper-like	FGL2
TESPA11	1.9914733376223e-28	0.464653268855312	0.473	0.115	6.67900327971768e-24	5-Helper-like	TESPA1
FXYD5	2.5719632301422e-27	0.570784536629981	1	0.952	8.6258502812509e-23	5-Helper-like	FXYD5
FXYD7	6.13617739725339e-27	0.46067347289026	0.355	0.072	2.05795117549084e-22	5-Helper-like	FXYD7
FXYD1	3.54595020577818e-26	0.303603928863131	0.236	0.034	1.18924078001389e-21	5-Helper-like	FXYD1
SELL1	1.05921261816441e-25	0.691534147499763	0.691	0.267	3.5523872787998e-21	5-Helper-like	SELL
JUNB1	1.47159505956511e-25	0.865663028521721	0.991	0.89	4.93543551076947e-21	5-Helper-like	JUNB
IL6R	1.97456711212094e-25	0.297165790694242	0.318	0.06	6.62230318063121e-21	5-Helper-like	IL6R
TPT1	1.69013564028324e-24	0.278048040088234	1	1	5.66837691038194e-20	5-Helper-like	TPT1
CSGALNACT1	5.25754376023021e-24	0.339204926982475	0.309	0.059	1.76327502630601e-19	5-Helper-like	CSGALNACT1
ICAM21	2.06010206192422e-23	0.574438041198429	0.545	0.173	6.90917029528145e-19	5-Helper-like	ICAM2
RPL181	2.44355807562827e-23	0.260861288655038	0.991	0.999	8.1952050740421e-19	5-Helper-like	RPL18
FTH1	4.2951125186781e-23	0.515066117927489	1	0.999	1.44049483651426e-18	5-Helper-like	FTH1
RILPL21	7.40315446227868e-23	0.635481478963885	0.918	0.638	2.48286994355902e-18	5-Helper-like	RILPL2
GPR1831	2.65405912354515e-22	0.677586910251707	0.909	0.522	8.90118348854571e-18	5-Helper-like	GPR183
FAAH2	3.15066156129024e-22	0.400603477828919	0.309	0.064	1.05666887442552e-17	5-Helper-like	FAAH2
SARAF1	3.3596835886733e-22	0.392662094547199	1	0.998	1.12677068196925e-17	5-Helper-like	SARAF
RPL51	7.21185411803539e-22	0.275322423930787	1	0.998	2.41871163410671e-17	5-Helper-like	RPL5
MAL1	5.639548423371e-21	0.352917909212079	0.273	0.054	1.89139175023016e-16	5-Helper-like	MAL
ARHGAP5	1.15645388053074e-19	0.39250170590971	0.364	0.095	3.87851502452399e-15	5-Helper-like	ARHGAP5
RHOH2	2.9959639800261e-19	0.536458846051933	0.955	0.665	1.00478639962115e-14	5-Helper-like	RHOH
ANKRD121	9.67280658758181e-19	0.562763096482319	0.973	0.835	3.24406587334319e-14	5-Helper-like	ANKRD12
EEF21	2.24064333539303e-18	0.340488129734503	0.991	0.996	7.51466961824113e-14	5-Helper-like	EEF2
AMPD2	2.34753772303895e-18	0.385184190148044	0.455	0.146	7.87317201552803e-14	5-Helper-like	AMPD2
ITPKB	1.71211114802084e-17	0.378786515947453	0.509	0.18	5.74207836823228e-13	5-Helper-like	ITPKB
LMO4	1.45973883221175e-16	0.491528717674071	0.391	0.122	4.89567209547176e-12	5-Helper-like	LMO4
PGAP1	1.57209843911746e-16	0.502666889482497	0.509	0.202	5.27250374511213e-12	5-Helper-like	PGAP1
USP46	1.75412087004086e-16	0.274320242318786	0.227	0.047	5.88297057394304e-12	5-Helper-like	USP46
TNFAIP8	2.70920574055488e-16	0.407227880126168	0.5	0.188	9.08613421267296e-12	5-Helper-like	TNFAIP8
LDHB1	3.12141226893359e-15	0.406867238135713	0.936	0.838	1.04685924675495e-10	5-Helper-like	LDHB
LTB2	6.68399606184204e-15	0.512632364808367	0.918	0.644	2.24167859922058e-10	5-Helper-like	LTB
SORL1	1.24237992473938e-14	0.419476903363137	0.618	0.273	4.16669379159094e-10	5-Helper-like	SORL1
ZNF80	1.84143417805034e-14	0.280121344926789	0.127	0.018	6.17580194634525e-10	5-Helper-like	ZNF80
NDUFV21	3.02453457375323e-14	0.532012368747352	0.845	0.668	1.01436840534536e-09	5-Helper-like	NDUFV2
RPL41	6.67150587284936e-14	0.29610612425742	0.973	0.994	2.23748963963622e-09	5-Helper-like	RPL4
GALT	9.80710509042912e-14	0.317283351787275	0.336	0.105	3.28910690522812e-09	5-Helper-like	GALT
TNIK	3.36330417149236e-13	0.557871486169658	0.609	0.336	1.12798495303511e-08	5-Helper-like	TNIK
FAS	6.88488285082438e-13	0.421656557598093	0.573	0.28	2.30905201050948e-08	5-Helper-like	FAS
PLAUR1	1.85429743883814e-12	0.452049791772532	0.618	0.322	6.21894275037537e-08	5-Helper-like	PLAUR
RCAN3	6.92605589992403e-12	0.393069645368674	0.618	0.312	2.32286062771652e-07	5-Helper-like	RCAN3
SOCS3	8.21374501539379e-12	0.411795611426252	0.591	0.305	2.75472580326277e-07	5-Helper-like	SOCS3
GATA3	1.5630272640676e-11	0.583747878317861	0.782	0.563	5.24208083822992e-07	5-Helper-like	GATA3
PTTG1IP	1.96013561451949e-11	0.374391943048195	0.482	0.222	6.57390282397547e-07	5-Helper-like	PTTG1IP
NDFIP11	3.87862152270822e-11	0.348759708418483	0.927	0.673	1.30081208628588e-06	5-Helper-like	NDFIP1
PHLDB31	3.90185585248991e-11	0.31895092100195	0.418	0.167	1.30860441580807e-06	5-Helper-like	PHLDB3
RPL71	3.97559853872818e-11	0.258746860313294	0.991	0.985	1.33333623791866e-06	5-Helper-like	RPL7
FOXP11	9.22614822127639e-11	0.390465141198606	0.764	0.495	3.09426559045167e-06	5-Helper-like	FOXP1
GLIPR1	4.00278060514372e-10	0.45854148492464	0.882	0.721	1.3424525593531e-05	5-Helper-like	GLIPR1
EXOC31	5.97099257162476e-10	0.282590984931667	0.327	0.126	2.00255148867151e-05	5-Helper-like	EXOC3
RHBDD2	9.69156360203015e-10	0.376437529502431	0.809	0.64	3.25035660084887e-05	5-Helper-like	RHBDD2
UCP21	1.19501081036316e-09	0.394462426152876	0.909	0.72	4.00782725579596e-05	5-Helper-like	UCP2
SFXN11	1.55122913512447e-09	0.315224793796556	0.518	0.26	5.20251227338045e-05	5-Helper-like	SFXN1
SLC2A31	4.5462731329184e-09	0.419769835002381	0.982	0.909	0.000152472908331817	5-Helper-like	SLC2A3
LEPROTL11	5.02050972214645e-09	0.321870617847618	0.964	0.902	0.000168377855061348	5-Helper-like	LEPROTL1
CAMK41	6.09122931776538e-09	0.378866866577949	0.773	0.516	0.000204287648859215	5-Helper-like	CAMK4
SRSF8	8.21010860102112e-09	0.326597703184684	0.418	0.2	0.000275350622261046	5-Helper-like	SRSF8
CFAP36	1.06230975307829e-08	0.287624209742937	0.436	0.209	0.000356277444987396	5-Helper-like	CFAP36
USP10	1.11989823917071e-08	0.298978448468666	0.536	0.274	0.000375591471453072	5-Helper-like	USP10
ARMH11	1.2142655023627e-08	0.260871864357373	0.418	0.189	0.000407240364182403	5-Helper-like	ARMH1
SOCS1	1.43538610888503e-08	0.431100362026968	0.673	0.426	0.000481399793197861	5-Helper-like	SOCS1
CDKN1B	2.41020290203519e-08	0.365026723726747	0.745	0.518	0.000808333849284563	5-Helper-like	CDKN1B
TNFSF8	2.48805683163581e-08	0.437351100872961	0.436	0.23	0.000834444500194018	5-Helper-like	TNFSF8
DCXR1	4.38934863355705e-08	0.44176672823857	0.845	0.612	0.00147209974472236	5-Helper-like	DCXR
PDCD1	4.93360690676528e-08	0.378187782239741	0.182	0.058	0.00165463308439094	5-Helper-like	PDCD1
ANP32B1	7.16740546418764e-08	0.34565727080366	0.782	0.571	0.00240380444457925	5-Helper-like	ANP32B
CD8B1	7.22647691782688e-08	0.388462655613549	0.855	0.756	0.00242361582870078	5-Helper-like	CD8B
IL16	1.0619208804898e-07	0.276995353906099	0.482	0.255	0.00356147024898669	5-Helper-like	IL16
DDIT4	1.15265211443318e-07	0.57536785967104	0.845	0.706	0.00386576466138599	5-Helper-like	DDIT4
SDCBP1	1.59314348970348e-07	0.311280018370411	0.836	0.592	0.00534308463576752	5-Helper-like	SDCBP
SC5D1	1.75096833881423e-07	0.37870985910768	0.618	0.414	0.00587239761471516	5-Helper-like	SC5D
CD551	2.44875866289451e-07	0.253162511025118	0.964	0.882	0.0082126468036156	5-Helper-like	CD55
FAM107B	5.22545653394433e-07	0.363781465153301	0.873	0.749	0.0175251361235425	5-Helper-like	FAM107B
YWHAB	5.26464414059402e-07	0.28328979500415	0.945	0.851	0.0176565635187242	5-Helper-like	YWHAB
FYB12	6.46267638795115e-07	0.320602125285916	0.764	0.581	0.0216745240699106	5-Helper-like	FYB1
TMEM173	7.71610665806235e-07	0.261161373408429	0.355	0.168	0.0258782785098095	5-Helper-like	TMEM173
BAG3	8.96608713391162e-07	0.283691217335306	0.518	0.296	0.0300704630297128	5-Helper-like	BAG3
GSTK1	9.10442407436832e-07	0.301581150842852	0.855	0.7	0.0305344174606165	5-Helper-like	GSTK1
RGS101	1.02730197139969e-06	0.309822968017695	0.736	0.514	0.0344536535168027	5-Helper-like	RGS10
SNHG81	1.06426770085108e-06	0.277361587931344	0.936	0.897	0.0356934101511434	5-Helper-like	SNHG8
P2RY10	1.50483072748512e-06	0.285353857546615	0.6	0.374	0.0504690129383958	5-Helper-like	P2RY10
SAMSN11	1.60381059678042e-06	0.279895733889755	0.809	0.547	0.0537885997948218	5-Helper-like	SAMSN1
GABARAPL1	1.85351479339925e-06	0.291762894267392	0.945	0.908	0.0621631791410241	5-Helper-like	GABARAPL1
RNASET2	2.5750529377738e-06	0.263777890232868	0.573	0.361	0.0863621254270576	5-Helper-like	RNASET2
PDE4A	4.42079623799394e-06	0.284240701728351	0.327	0.165	0.148264664229841	5-Helper-like	PDE4A
BORCS5	8.2717701134892e-06	0.334574188269053	0.564	0.356	0.277418626066201	5-Helper-like	BORCS5
CD2	9.3081048756825e-06	0.3118452878563	0.855	0.744	0.31217522132064	5-Helper-like	CD2
CD481	1.27707699667181e-05	0.253758966178387	0.836	0.698	0.42830608314379	5-Helper-like	CD48
INSIG1	1.27947902699131e-05	0.258681577006979	0.755	0.584	0.429111676072345	5-Helper-like	INSIG1
STAT31	1.74315587897421e-05	0.278198755374155	0.809	0.714	0.584619618690371	5-Helper-like	STAT3
USP31	1.7458907662208e-05	0.305044138970994	0.645	0.443	0.585536845175132	5-Helper-like	USP3
MYC	2.32007694950893e-05	0.27770393075352	0.245	0.112	0.778107407326305	5-Helper-like	MYC
SH3TC1	3.11526998210444e-05	0.294695830828557	0.291	0.15	1	5-Helper-like	SH3TC1
EIF3E1	3.75212631207026e-05	0.262121929003381	0.873	0.823	1	5-Helper-like	EIF3E
CRYBG1	3.93448563371626e-05	0.291252672529722	0.7	0.538	1	5-Helper-like	CRYBG1
TECR1	5.69245232631162e-05	0.258414849050515	0.809	0.623	1	5-Helper-like	TECR
HNRNPLL	7.15707335272375e-05	0.267865117043719	0.464	0.282	1	5-Helper-like	HNRNPLL
RARRES3	0.000249351777479392	0.357118501691112	0.764	0.655	1	5-Helper-like	RARRES3
BAZ1A	0.000336492741385288	0.282639913166615	0.627	0.441	1	5-Helper-like	BAZ1A
SOD1	0.00055039228756584	0.250050403971622	0.855	0.793	1	5-Helper-like	SOD1
RGS11	0.000776018437583498	0.320491815159376	0.4	0.258	1	5-Helper-like	RGS1
ITM2A	0.000957624030757393	0.278521411303875	0.491	0.34	1	5-Helper-like	ITM2A
CCR9	7.76800542262682e-289	0.75759406969104	0.464	0.001	2.60523365864058e-284	6-CCR9+ effectors	CCR9
CCR6	7.29190399508285e-165	0.691996172328206	0.393	0.004	2.44555876187089e-160	6-CCR9+ effectors	CCR6
KLRB11	1.92279865847229e-124	1.20196560305946	0.536	0.018	6.44868214078436e-120	6-CCR9+ effectors	KLRB1
TMIGD2	9.51902107320656e-62	0.433733661415556	0.268	0.009	3.19248928753201e-57	6-CCR9+ effectors	TMIGD2
KLRC1	5.19993291196408e-46	0.877876412170585	0.482	0.049	1.74395350001451e-41	6-CCR9+ effectors	KLRC1
LZTFL1	1.13216819627252e-21	0.635477903712748	0.446	0.088	3.79706569665877e-17	6-CCR9+ effectors	LZTFL1
MLF11	5.22321939063293e-18	0.432377345164771	0.304	0.048	1.75176331923047e-13	6-CCR9+ effectors	MLF1
LDLRAD41	1.51414397030851e-14	0.981938884080277	0.786	0.382	5.07813604762067e-10	6-CCR9+ effectors	LDLRAD4
ITM2C1	1.89398633904927e-14	0.567099173170134	0.661	0.249	6.35205138390346e-10	6-CCR9+ effectors	ITM2C
RPL321	2.28225671955972e-14	0.262570784753818	1	0.999	7.65423258605939e-10	6-CCR9+ effectors	RPL32
ANKRD28	3.88366681794446e-14	0.496507262679571	0.393	0.096	1.30250417740221e-09	6-CCR9+ effectors	ANKRD28
ITGAE	6.99667369261407e-14	0.582755648136858	0.429	0.118	2.34654442302891e-09	6-CCR9+ effectors	ITGAE
RPLP1	2.08320701381561e-12	0.267898954008989	1	1	6.98665968293479e-08	6-CCR9+ effectors	RPLP1
IL7R	3.12271725953525e-12	0.596040117991697	0.982	0.926	1.04729691450293e-07	6-CCR9+ effectors	IL7R
FAM27C	1.55132800104029e-11	0.292689981186915	0.143	0.017	5.20284384988891e-07	6-CCR9+ effectors	FAM27C
IFT22	1.98655736941494e-11	0.29547684074191	0.268	0.056	6.66251610554382e-07	6-CCR9+ effectors	IFT22
CCL52	3.96993483620336e-11	0.556998581294581	1	0.88	1.33143674536588e-06	6-CCR9+ effectors	CCL5
PNMA1	8.5544784293152e-11	0.45072280340671	0.571	0.222	2.86900097562373e-06	6-CCR9+ effectors	PNMA1
MAPRE31	3.40817955600949e-10	0.416549206134945	0.357	0.103	1.14303525949446e-05	6-CCR9+ effectors	MAPRE3
MAP1A	9.32583814830161e-10	0.399600219169022	0.268	0.066	3.12769959817739e-05	6-CCR9+ effectors	MAP1A
GFPT2	4.58704679988998e-09	0.451498296265771	0.196	0.04	0.00015384037557471	6-CCR9+ effectors	GFPT2
SESN1	2.93520028822768e-08	0.388005638155985	0.286	0.083	0.000984407472665798	6-CCR9+ effectors	SESN1
ODF2L	9.95972360510686e-08	0.511719935430677	0.625	0.339	0.00334029210268074	6-CCR9+ effectors	ODF2L
GNB2	2.36428237321931e-07	0.466300540916863	0.804	0.63	0.00792933022330293	6-CCR9+ effectors	GNB2
P2RX4	1.37755023366724e-06	0.255437688216125	0.179	0.045	0.046200279736732	6-CCR9+ effectors	P2RX4
ORAI2	1.72921930825518e-06	0.282507839592514	0.482	0.225	0.0579945571602622	6-CCR9+ effectors	ORAI2
GCHFR	2.086236043968e-06	0.35421315067326	0.286	0.098	0.0699681844425988	6-CCR9+ effectors	GCHFR
KLF61	3.16233303892824e-06	0.359131465692692	1	0.957	0.106058325459575	6-CCR9+ effectors	KLF6
SSBP4	3.16635730990887e-06	0.446731613560134	0.464	0.243	0.106193291459724	6-CCR9+ effectors	SSBP4
FOXJ3	3.56255014891312e-06	0.377220402876776	0.393	0.175	0.119480806894248	6-CCR9+ effectors	FOXJ3
AUTS21	3.96289291796001e-06	0.383769957453197	0.446	0.21	0.132907502682543	6-CCR9+ effectors	AUTS2
CRY1	5.309816708916e-06	0.438925929325725	0.643	0.43	0.178080632783625	6-CCR9+ effectors	CRY1
MAP9	5.39386262575786e-06	0.263766437301109	0.339	0.134	0.180899364742667	6-CCR9+ effectors	MAP9
ITM2B	5.42567302301912e-06	0.32320690359918	0.946	0.925	0.181966221846015	6-CCR9+ effectors	ITM2B
SLA2	5.61039809575365e-06	0.435539934541085	0.589	0.341	0.188161531335386	6-CCR9+ effectors	SLA2
NT5E	1.00242174835096e-05	0.286411998036361	0.304	0.118	0.336192205961946	6-CCR9+ effectors	NT5E
FAM214A	1.22740266425376e-05	0.442687358793058	0.375	0.177	0.411646305537426	6-CCR9+ effectors	FAM214A
CLIC3	1.39179678907334e-05	0.315694245727625	0.286	0.109	0.466780807119416	6-CCR9+ effectors	CLIC3
ITM2A1	1.4444950816686e-05	0.323001767528096	0.589	0.341	0.484454760490014	6-CCR9+ effectors	ITM2A
TTC1	1.69337558871082e-05	0.287478153699871	0.286	0.111	0.567924304941834	6-CCR9+ effectors	TTC1
SPATA33	1.74946816361781e-05	0.265396925188057	0.286	0.108	0.586736632714141	6-CCR9+ effectors	SPATA33
SLC37A1	2.0474425296038e-05	0.270279243911019	0.196	0.062	0.686671275578522	6-CCR9+ effectors	SLC37A1
CD8B2	2.09266774942446e-05	0.392939004675934	0.857	0.757	0.701838909801976	6-CCR9+ effectors	CD8B
APBB1IP	2.1158051941555e-05	0.428332586208332	0.518	0.324	0.709598746015873	6-CCR9+ effectors	APBB1IP
KIF3A	2.46594107361842e-05	0.352906801291416	0.411	0.219	0.827027317270146	6-CCR9+ effectors	KIF3A
DAAM1	2.50918712487308e-05	0.335965088656306	0.304	0.126	0.841531177939935	6-CCR9+ effectors	DAAM1
MGAT4A1	2.78522651409469e-05	0.362034455285298	0.554	0.34	0.934109268297077	6-CCR9+ effectors	MGAT4A
RORA	2.83088956867773e-05	0.411722886379755	0.696	0.506	0.949423743543137	6-CCR9+ effectors	RORA
EVL2	3.28080463399921e-05	0.369889667658779	0.714	0.535	1	6-CCR9+ effectors	EVL
EMP1	3.87869404819581e-05	0.274868680609728	0.375	0.173	1	6-CCR9+ effectors	EMP1
REPS1	4.28179857917362e-05	0.255268319153423	0.286	0.119	1	6-CCR9+ effectors	REPS1
GPR1832	5.30357573546693e-05	0.296036496072051	0.821	0.53	1	6-CCR9+ effectors	GPR183
ITGA4	5.95084933373967e-05	0.439811383406064	0.661	0.449	1	6-CCR9+ effectors	ITGA4
MED25	6.03426162730858e-05	0.263514002237476	0.375	0.182	1	6-CCR9+ effectors	MED25
LGALS31	6.59199532834061e-05	0.320225636117552	0.429	0.215	1	6-CCR9+ effectors	LGALS3
RGS12	6.74479556866226e-05	0.504758108614718	0.464	0.259	1	6-CCR9+ effectors	RGS1
LPIN2	7.98029772210946e-05	0.256504788382707	0.375	0.185	1	6-CCR9+ effectors	LPIN2
MRPL10	8.37253660029343e-05	0.269045844243898	0.625	0.394	1	6-CCR9+ effectors	MRPL10
STK17A	8.45702289504425e-05	0.352019913763788	0.875	0.717	1	6-CCR9+ effectors	STK17A
GSTK11	0.000102824527565405	0.343737007202162	0.839	0.703	1	6-CCR9+ effectors	GSTK1
ODC1	0.00011019811911662	0.300381372163403	0.893	0.841	1	6-CCR9+ effectors	ODC1
HPCAL41	0.000132009436123815	0.300024386977324	0.339	0.162	1	6-CCR9+ effectors	HPCAL4
PRR7	0.000141795605677098	0.298719330278718	0.393	0.205	1	6-CCR9+ effectors	PRR7
SLC7A6	0.000257929486888841	0.269557489317868	0.339	0.168	1	6-CCR9+ effectors	SLC7A6
CAMK42	0.000305193676502926	0.297025286457411	0.714	0.521	1	6-CCR9+ effectors	CAMK4
RPL7L1	0.000356688244650724	0.298597344501449	0.5	0.312	1	6-CCR9+ effectors	RPL7L1
SET	0.000364564933502987	0.275898838008423	0.607	0.442	1	6-CCR9+ effectors	SET
PRKACB	0.000364710002138282	0.270520884207884	0.375	0.195	1	6-CCR9+ effectors	PRKACB
CD3G	0.000412016325845047	0.386231552672033	0.75	0.577	1	6-CCR9+ effectors	CD3G
UBE2D2	0.000470069425517287	0.318492323631864	0.786	0.71	1	6-CCR9+ effectors	UBE2D2
SMPD1	0.000480240784850851	0.253101211934439	0.25	0.113	1	6-CCR9+ effectors	SMPD1
TSC22D31	0.000505382884735409	0.307562083369294	1	0.992	1	6-CCR9+ effectors	TSC22D3
ANKHD1	0.000539386777444861	0.26303199448036	0.268	0.129	1	6-CCR9+ effectors	ANKHD1
IFT57	0.000560067260944016	0.377617146427449	0.411	0.248	1	6-CCR9+ effectors	IFT57
AHR	0.000560745027026311	0.281915231997451	0.357	0.191	1	6-CCR9+ effectors	AHR
CD21	0.00061109818092578	0.288260487907738	0.857	0.746	1	6-CCR9+ effectors	CD2
CDC14A	0.000662308361194092	0.273054811217084	0.464	0.269	1	6-CCR9+ effectors	CDC14A
ATP2B1	0.000672295465779153	0.31781194689032	0.857	0.757	1	6-CCR9+ effectors	ATP2B1
PRKAR1A	0.000738355248407118	0.264711593497792	0.732	0.612	1	6-CCR9+ effectors	PRKAR1A
C12orf571	0.000759548931387718	0.304261185823056	0.911	0.875	1	6-CCR9+ effectors	C12orf57
PIK3IP11	0.000774558978889563	0.313490177258134	0.643	0.45	1	6-CCR9+ effectors	PIK3IP1
SAMSN12	0.000817876121916224	0.257766773059549	0.732	0.552	1	6-CCR9+ effectors	SAMSN1
RBL2	0.000983626634405906	0.269821986481687	0.554	0.36	1	6-CCR9+ effectors	RBL2
PERP	0.00110753339681881	0.333177166588055	0.5	0.334	1	6-CCR9+ effectors	PERP
RAB1B	0.00127166504170408	0.285407527316226	0.482	0.33	1	6-CCR9+ effectors	RAB1B
HOPX1	0.00130739510213078	0.302068767541575	0.536	0.355	1	6-CCR9+ effectors	HOPX
SECISBP21	0.00131636532952008	0.306929980637753	0.429	0.275	1	6-CCR9+ effectors	SECISBP2
ABCE1	0.00134234662335891	0.288832167242968	0.375	0.217	1	6-CCR9+ effectors	ABCE1
SCML41	0.00134515697682112	0.259981577579636	0.393	0.234	1	6-CCR9+ effectors	SCML4
TRAF3IP3	0.00137149620818152	0.283751213338431	0.339	0.188	1	6-CCR9+ effectors	TRAF3IP3
BCAP31	0.00141540851751541	0.304836178587552	0.607	0.458	1	6-CCR9+ effectors	BCAP31
CKLF	0.0014375683977395	0.304936585063419	0.268	0.136	1	6-CCR9+ effectors	CKLF
ATF7IP	0.00159911827285713	0.294537525559563	0.357	0.206	1	6-CCR9+ effectors	ATF7IP
GNB5	0.00194446169596686	0.288499298626882	0.429	0.271	1	6-CCR9+ effectors	GNB5
SRP9	0.00220625715270674	0.259010660060263	0.589	0.478	1	6-CCR9+ effectors	SRP9
ATP5PF	0.00259008451017526	0.265012921380829	0.536	0.415	1	6-CCR9+ effectors	ATP5PF
OXNAD11	0.00264560227962061	0.254081301632215	0.482	0.318	1	6-CCR9+ effectors	OXNAD1
CAST1	0.00272713995745645	0.276743308503974	0.732	0.67	1	6-CCR9+ effectors	CAST
VPS35	0.00326161215938607	0.257952297112148	0.411	0.271	1	6-CCR9+ effectors	VPS35
FDPS	0.00349036010495789	0.265472854010088	0.304	0.172	1	6-CCR9+ effectors	FDPS
ZNHIT1	0.00355214409243917	0.336585290625237	0.393	0.265	1	6-CCR9+ effectors	ZNHIT1
ABCB1	0.00424823162576969	0.284691918623314	0.196	0.092	1	6-CCR9+ effectors	ABCB1
LUC7L3	0.00440609517849779	0.263949047839064	0.5	0.366	1	6-CCR9+ effectors	LUC7L3
MYBL1	0.00448890276724059	0.270456951557553	0.125	0.047	1	6-CCR9+ effectors	MYBL1
RNASET21	0.00555962433212076	0.272076286224938	0.482	0.366	1	6-CCR9+ effectors	RNASET2
ILF3	0.00566963530948278	0.258663545117794	0.643	0.522	1	6-CCR9+ effectors	ILF3
HADHA	0.0061975617667064	0.264682123111251	0.571	0.454	1	6-CCR9+ effectors	HADHA
LRRC23	0.00627284841495598	0.281742825085994	0.196	0.099	1	6-CCR9+ effectors	LRRC23
EPS15	0.00699759942876342	0.306578296811706	0.411	0.266	1	6-CCR9+ effectors	EPS15
KLRC3	2.54657902910644e-169	0.965849758522409	0.478	0.007	8.54071674781717e-165	7-KIR3DL2+ effectors	KLRC3
KIR3DL2	2.15714917700138e-113	0.775093241686083	0.304	0.004	7.23464690982723e-109	7-KIR3DL2+ effectors	KIR3DL2
COBL	5.27381613917584e-107	0.36900417941769	0.152	0	1.76873245675679e-102	7-KIR3DL2+ effectors	COBL
IKZF2	7.74396373731977e-82	0.637914519213066	0.196	0.002	2.5971705582223e-77	7-KIR3DL2+ effectors	IKZF2
MME	8.80846909573906e-79	0.57466467818816	0.13	0	2.95418436532896e-74	7-KIR3DL2+ effectors	MME
RTKN2	1.52382103032956e-48	0.288422917740383	0.196	0.005	5.11059097151927e-44	7-KIR3DL2+ effectors	RTKN2
SOX4	1.58824018356653e-47	1.42498748130211	0.37	0.023	5.32663992764542e-43	7-KIR3DL2+ effectors	SOX4
USP6NL	1.82582303988535e-46	0.490510605803619	0.304	0.015	6.1234453111675e-42	7-KIR3DL2+ effectors	USP6NL
TOX	1.04643652943333e-30	0.808858595415494	0.261	0.018	3.50953883241351e-26	7-KIR3DL2+ effectors	TOX
GEM	2.42189894359708e-30	1.28376183882682	0.37	0.037	8.1225646770359e-26	7-KIR3DL2+ effectors	GEM
KRT86	2.68889582973271e-27	0.42748032034848	0.13	0.004	9.01801883375758e-23	7-KIR3DL2+ effectors	KRT86
ZNF667-AS1	1.41349663026184e-25	0.354564203173576	0.239	0.018	4.74058499857217e-21	7-KIR3DL2+ effectors	ZNF667-AS1
KLRC2	4.47737845371267e-24	0.260230097633093	0.174	0.01	1.50162318580616e-19	7-KIR3DL2+ effectors	KLRC2
B3GNT7	6.79756261994268e-24	0.261708156124924	0.109	0.003	2.27976655147638e-19	7-KIR3DL2+ effectors	B3GNT7
GNG4	1.30666872938363e-22	0.439345143486549	0.13	0.006	4.38230558460682e-18	7-KIR3DL2+ effectors	GNG4
KLF4	1.37315855557493e-22	0.486191296577697	0.217	0.017	4.60529916368719e-18	7-KIR3DL2+ effectors	KLF4
TLE1	7.25598873782485e-21	0.259170239717544	0.13	0.006	2.4335135028917e-16	7-KIR3DL2+ effectors	TLE1
CD71	1.17159738121566e-20	1.00771736689708	1	0.844	3.92930329712109e-16	7-KIR3DL2+ effectors	CD7
PDE4A1	2.20140638133048e-20	0.8317728887266	0.63	0.164	7.38307672170616e-16	7-KIR3DL2+ effectors	PDE4A
VAV3	2.73881055294515e-18	0.814051840624776	0.63	0.179	9.18542283246746e-14	7-KIR3DL2+ effectors	VAV3
ID32	6.39240362550358e-18	0.421795165896065	0.348	0.053	2.14388432792139e-13	7-KIR3DL2+ effectors	ID3
ACTN11	1.28533737566133e-17	0.544234930534037	0.413	0.075	4.31076449049298e-13	7-KIR3DL2+ effectors	ACTN1
ARID5B1	2.75857900427152e-17	0.895604418390122	0.696	0.234	9.25172226452584e-13	7-KIR3DL2+ effectors	ARID5B
TIMP2	1.57159348471365e-15	0.309343357285528	0.174	0.016	5.27081022903263e-11	7-KIR3DL2+ effectors	TIMP2
KDM4B1	2.59411978075971e-15	0.665345166147795	0.5	0.131	8.70015892071192e-11	7-KIR3DL2+ effectors	KDM4B
LITAF	4.26115044391445e-15	0.759439344949794	0.978	0.942	1.42910463588003e-10	7-KIR3DL2+ effectors	LITAF
FAM177A11	4.29407348253934e-15	0.806772388482092	1	0.955	1.44014636457405e-10	7-KIR3DL2+ effectors	FAM177A1
PTP4A1	9.68596181280511e-15	0.945395300222762	0.957	0.713	3.24847787277858e-10	7-KIR3DL2+ effectors	PTP4A1
DCXR2	6.00567404134752e-14	0.881476716503496	0.957	0.615	2.01418295998713e-09	7-KIR3DL2+ effectors	DCXR
GPCPD1	2.91419388912704e-13	1.00357767699769	0.935	0.673	9.77362346535427e-09	7-KIR3DL2+ effectors	GPCPD1
PTGDR	5.90219221411763e-13	0.385898423706537	0.196	0.025	1.97947722477077e-08	7-KIR3DL2+ effectors	PTGDR
RIN1	6.64139540730177e-13	0.25435673973818	0.152	0.015	2.22739119170087e-08	7-KIR3DL2+ effectors	RIN1
IL7R1	1.01047131097386e-12	0.667568529455956	0.978	0.926	3.38891868274413e-08	7-KIR3DL2+ effectors	IL7R
SRGN	1.61334359217651e-12	0.371640900673605	1	0.998	5.4108317394416e-08	7-KIR3DL2+ effectors	SRGN
CD552	2.54925613647809e-12	0.638917031364663	0.978	0.883	8.54969523052021e-08	7-KIR3DL2+ effectors	CD55
EZR	6.75487738542283e-12	0.475713306907773	0.978	0.995	2.26545077752311e-07	7-KIR3DL2+ effectors	EZR
LATS2	8.60353030636472e-12	0.294805150548182	0.196	0.027	2.8854519941486e-07	7-KIR3DL2+ effectors	LATS2
VPS37B	9.57442723137972e-12	0.653763642214859	0.935	0.687	3.21107140486013e-07	7-KIR3DL2+ effectors	VPS37B
MIR181A1HG	1.00080398515946e-11	0.26588791791144	0.109	0.009	3.3564964054278e-07	7-KIR3DL2+ effectors	MIR181A1HG
CEMIP2	1.06580704583165e-11	1.00362405197506	0.761	0.427	3.57450367031019e-07	7-KIR3DL2+ effectors	CEMIP2
AREG1	1.61166955267081e-11	0.846601690720496	0.63	0.248	5.40521734574736e-07	7-KIR3DL2+ effectors	AREG
PIK3R3	2.65697951936857e-11	0.256951795692254	0.174	0.022	8.91097791205832e-07	7-KIR3DL2+ effectors	PIK3R3
PABPC1	5.97958272117218e-11	0.425764948410909	1	1	2.00543245302672e-06	7-KIR3DL2+ effectors	PABPC1
CCDC571	8.20133954461144e-11	0.778198250132358	0.674	0.322	2.75056525647179e-06	7-KIR3DL2+ effectors	CCDC57
FAM13A	8.26309268905955e-11	0.263162283480103	0.196	0.029	2.77127602605679e-06	7-KIR3DL2+ effectors	FAM13A
HSPD1	1.53460826071293e-10	0.688402508295943	0.935	0.784	5.14676918477901e-06	7-KIR3DL2+ effectors	HSPD1
BEX31	1.73379176041557e-10	0.395441049655887	0.283	0.06	5.81479080608175e-06	7-KIR3DL2+ effectors	BEX3
PHF201	4.69245535982323e-10	0.637698957226909	0.826	0.638	1.57375567857752e-05	7-KIR3DL2+ effectors	PHF20
PRKCH	4.91878117810048e-10	0.611820904036756	0.826	0.513	1.64966083151134e-05	7-KIR3DL2+ effectors	PRKCH
FOXN2	8.60672012318219e-10	0.483759757430204	0.457	0.155	2.88652179491284e-05	7-KIR3DL2+ effectors	FOXN2
SLC25A25	9.33953403493064e-10	0.414402702639137	0.261	0.056	3.13229292463504e-05	7-KIR3DL2+ effectors	SLC25A25
PPP2R5C	1.28499844711912e-09	0.782867434194675	0.935	0.713	4.3096277919481e-05	7-KIR3DL2+ effectors	PPP2R5C
CD300A	1.31501358109906e-09	0.489312589662	0.457	0.155	4.41029254829002e-05	7-KIR3DL2+ effectors	CD300A
MAPRE2	1.4896158893185e-09	0.610680272689523	0.957	0.748	4.9958737695964e-05	7-KIR3DL2+ effectors	MAPRE2
ISCA1	2.18919855334387e-09	0.540269278760062	0.935	0.763	7.34213410820468e-05	7-KIR3DL2+ effectors	ISCA1
STK17A1	2.19847441990129e-09	0.548191218942234	0.935	0.717	7.37324350946495e-05	7-KIR3DL2+ effectors	STK17A
CD691	2.71927282148048e-09	0.567676604092809	0.935	0.678	9.11989718868123e-05	7-KIR3DL2+ effectors	CD69
AGPAT51	4.18607502391793e-09	0.839968419141756	0.304	0.079	0.00014039258415216	7-KIR3DL2+ effectors	AGPAT5
ICAM22	1.01414836038237e-08	0.513991449008334	0.478	0.182	0.000340125077105038	7-KIR3DL2+ effectors	ICAM2
H3F3B1	2.24118883742919e-08	0.313980037672581	1	0.999	0.000751649912297003	7-KIR3DL2+ effectors	H3F3B
ZNF426	2.48463021290868e-08	0.298002762625886	0.283	0.072	0.000833295280805311	7-KIR3DL2+ effectors	ZNF426
NFE2L2	2.65039260622218e-08	0.630377226004434	0.87	0.682	0.000888888672274794	7-KIR3DL2+ effectors	NFE2L2
HSPE1	4.72530484736137e-08	0.589709245254469	0.935	0.828	0.00158477273970806	7-KIR3DL2+ effectors	HSPE1
TNFSF81	5.57041662751088e-08	0.467036200144099	0.543	0.233	0.0018682063285346	7-KIR3DL2+ effectors	TNFSF8
ZHX2	7.64803203443243e-08	0.583234915818606	0.717	0.472	0.00256499698370795	7-KIR3DL2+ effectors	ZHX2
LAT2	9.09784523219886e-08	0.286200642866793	0.13	0.019	0.00305123533397485	7-KIR3DL2+ effectors	LAT2
LEF11	9.24295770616568e-08	0.554409296382348	0.5	0.216	0.00309990315549385	7-KIR3DL2+ effectors	LEF1
CHPT1	1.15379464835513e-07	0.498524555721961	0.326	0.105	0.00386959649165343	7-KIR3DL2+ effectors	CHPT1
LYPD31	1.53492292394458e-07	0.401564357396004	0.304	0.09	0.00514782450232532	7-KIR3DL2+ effectors	LYPD3
PTGER4	3.31491384333234e-07	0.486249876108779	0.891	0.769	0.011117558047768	7-KIR3DL2+ effectors	PTGER4
H3F3A1	3.47936819843832e-07	0.387150633511799	0.957	0.987	0.0116691050639224	7-KIR3DL2+ effectors	H3F3A
UCP22	3.70960627018222e-07	0.587449302039012	0.87	0.725	0.0124412775089371	7-KIR3DL2+ effectors	UCP2
LRMP	4.17215315758778e-07	0.559780467566185	0.457	0.193	0.0139925672599179	7-KIR3DL2+ effectors	LRMP
FTH11	5.49238126026595e-07	0.532411021798098	1	0.999	0.01842034827068	7-KIR3DL2+ effectors	FTH1
PDP1	6.29795063374078e-07	0.384984885895667	0.5	0.225	0.0211220668354398	7-KIR3DL2+ effectors	PDP1
NR4A21	9.13843319473815e-07	0.409755102797414	0.978	0.857	0.0306484772485128	7-KIR3DL2+ effectors	NR4A2
FOS1	9.67228277460909e-07	0.431662940308634	1	0.969	0.032438901969484	7-KIR3DL2+ effectors	FOS
SYAP1	9.68237048347018e-07	0.488080526436591	0.913	0.825	0.0324727341274623	7-KIR3DL2+ effectors	SYAP1
SLC2A32	9.83730710029087e-07	0.48615706038655	0.978	0.91	0.0329923605529555	7-KIR3DL2+ effectors	SLC2A3
PIK3R1	1.01308947982903e-06	0.543260399169164	0.891	0.829	0.0339769949745061	7-KIR3DL2+ effectors	PIK3R1
PPP1CB	1.05739405468441e-06	0.518007142734486	0.848	0.758	0.0354628818060058	7-KIR3DL2+ effectors	PPP1CB
SMAP21	1.31631030000716e-06	0.525755429887016	0.63	0.389	0.0441464148416402	7-KIR3DL2+ effectors	SMAP2
SMC4	1.70762914504203e-06	0.58106409869135	0.37	0.147	0.0572704662664196	7-KIR3DL2+ effectors	SMC4
RPA1	2.43071855502186e-06	0.437299732112786	0.348	0.134	0.0815214388983231	7-KIR3DL2+ effectors	RPA1
CCM2	2.51289895339191e-06	0.407095605853876	0.391	0.157	0.0842776050988579	7-KIR3DL2+ effectors	CCM2
MICAL1	2.93263962103364e-06	0.368306419089855	0.348	0.131	0.0983548676102261	7-KIR3DL2+ effectors	MICAL1
ZNF331	3.0228058256863e-06	0.590809836575801	0.891	0.737	0.101378861781867	7-KIR3DL2+ effectors	ZNF331
PHLDB32	3.37695995451335e-06	0.350735384509773	0.413	0.172	0.113256482954469	7-KIR3DL2+ effectors	PHLDB3
BANP	3.9899534519259e-06	0.385707058184276	0.348	0.131	0.133815058870691	7-KIR3DL2+ effectors	BANP
STT3B	4.64381781599045e-06	0.7057953377054	0.478	0.237	0.155744361912688	7-KIR3DL2+ effectors	STT3B
IFITM2	5.43730301887572e-06	0.528933624943233	0.826	0.803	0.182356268647054	7-KIR3DL2+ effectors	IFITM2
BORCS51	5.83226868183048e-06	0.510446751426932	0.609	0.359	0.195602627051231	7-KIR3DL2+ effectors	BORCS5
ZNF786	6.85970377879572e-06	0.358563390970657	0.217	0.062	0.230060745333251	7-KIR3DL2+ effectors	ZNF786
BACH21	6.94925870257057e-06	0.63730013424635	0.739	0.533	0.233064238366812	7-KIR3DL2+ effectors	BACH2
RBM391	8.06765928446498e-06	0.420895678728223	0.913	0.875	0.270573157082386	7-KIR3DL2+ effectors	RBM39
ANKRD13C	8.20693083174214e-06	0.407006838953928	0.413	0.186	0.275244046234968	7-KIR3DL2+ effectors	ANKRD13C
SLC16A31	9.14069545466157e-06	0.481828519264407	0.717	0.578	0.30656064415844	7-KIR3DL2+ effectors	SLC16A3
TRIM8	1.07236402721671e-05	0.286281389997742	0.261	0.085	0.359649447447942	7-KIR3DL2+ effectors	TRIM8
CHD7	1.08459044682153e-05	0.378497645799939	0.326	0.123	0.363749944055004	7-KIR3DL2+ effectors	CHD7
ATP5IF11	1.28405064124641e-05	0.381998728166071	0.761	0.516	0.430644904061223	7-KIR3DL2+ effectors	ATP5IF1
SPINT21	1.29602169225429e-05	0.381867612907256	0.348	0.144	0.434659755148243	7-KIR3DL2+ effectors	SPINT2
USP36	1.64916428062967e-05	0.463986059295006	0.826	0.678	0.553096716437579	7-KIR3DL2+ effectors	USP36
PGK1	1.93718522045366e-05	0.351541093578686	0.978	0.93	0.649693179235749	7-KIR3DL2+ effectors	PGK1
RTN4	2.14830496105162e-05	0.434374298230791	0.652	0.428	0.720498517837492	7-KIR3DL2+ effectors	RTN4
MAD1L1	2.16525217185289e-05	0.553473679488806	0.391	0.193	0.726182273396023	7-KIR3DL2+ effectors	MAD1L1
PGRMC2	2.42923630887342e-05	0.38145897719941	0.457	0.227	0.814717273269969	7-KIR3DL2+ effectors	PGRMC2
SETD2	2.58709596370052e-05	0.588477478527079	0.717	0.521	0.867660244305879	7-KIR3DL2+ effectors	SETD2
FASN	2.82233376218792e-05	0.502716464021731	0.5	0.294	0.946554297162585	7-KIR3DL2+ effectors	FASN
YPEL5	2.82766120097362e-05	0.293608443556422	1	0.994	0.948341013582533	7-KIR3DL2+ effectors	YPEL5
NUCB2	2.90025224806772e-05	0.356363146170944	0.478	0.241	0.972686598956952	7-KIR3DL2+ effectors	NUCB2
CAST2	3.94086816680955e-05	0.394529763582405	0.826	0.669	1	7-KIR3DL2+ effectors	CAST
IFITM1	4.21535933083708e-05	0.446947256391911	0.957	0.966	1	7-KIR3DL2+ effectors	IFITM1
CA5B	4.34390588062406e-05	0.386024688285617	0.587	0.365	1	7-KIR3DL2+ effectors	CA5B
GUK1	5.14269774871954e-05	0.344651894772716	0.978	0.882	1	7-KIR3DL2+ effectors	GUK1
PTPN22	5.63496346642932e-05	0.585919752519861	0.696	0.534	1	7-KIR3DL2+ effectors	PTPN22
ZNF6832	5.68333493015523e-05	0.338964477956278	0.435	0.205	1	7-KIR3DL2+ effectors	ZNF683
RHOH3	5.91968417447022e-05	0.654537529608205	0.761	0.674	1	7-KIR3DL2+ effectors	RHOH
CNOT2	6.34211559297865e-05	0.414388780218061	0.717	0.574	1	7-KIR3DL2+ effectors	CNOT2
IFITM3	6.77637221961733e-05	0.417138393248409	0.674	0.478	1	7-KIR3DL2+ effectors	IFITM3
MBP	7.57828990870529e-05	0.473489597664989	0.913	0.819	1	7-KIR3DL2+ effectors	MBP
KCTD5	7.59659664831526e-05	0.280914705954646	0.261	0.096	1	7-KIR3DL2+ effectors	KCTD5
SURF2	7.99860971562515e-05	0.425452926141764	0.543	0.343	1	7-KIR3DL2+ effectors	SURF2
WIPF1	8.55275280868308e-05	0.438151979028739	0.848	0.747	1	7-KIR3DL2+ effectors	WIPF1
RBKS	8.64426055343742e-05	0.375635664603979	0.304	0.125	1	7-KIR3DL2+ effectors	RBKS
FOSB1	9.00825204675672e-05	0.392430363617269	0.913	0.794	1	7-KIR3DL2+ effectors	FOSB
AKAP13	9.40434964763483e-05	0.420422808064698	0.935	0.823	1	7-KIR3DL2+ effectors	AKAP13
ITPRIP	9.45838839730985e-05	0.520953941668589	0.522	0.314	1	7-KIR3DL2+ effectors	ITPRIP
LRWD1	9.48136839034065e-05	0.337767117538414	0.37	0.173	1	7-KIR3DL2+ effectors	LRWD1
H2AFJ	0.00010130264305476	0.332735554516901	0.522	0.293	1	7-KIR3DL2+ effectors	H2AFJ
DHX36	0.000107127736069933	0.433051515817582	0.696	0.555	1	7-KIR3DL2+ effectors	DHX36
CTDP1	0.000111020438551219	0.509022497002307	0.413	0.219	1	7-KIR3DL2+ effectors	CTDP1
HMGN2	0.000111635726671943	0.440168579229372	0.804	0.625	1	7-KIR3DL2+ effectors	HMGN2
SIPA1L1	0.00011184655619357	0.348377571275214	0.326	0.139	1	7-KIR3DL2+ effectors	SIPA1L1
ALG131	0.000115193025444329	0.482111297365962	0.674	0.468	1	7-KIR3DL2+ effectors	ALG13
DAAM11	0.000118044991978925	0.385372041870432	0.304	0.127	1	7-KIR3DL2+ effectors	DAAM1
HNRNPA2B1	0.000119734275928918	0.362004321924386	0.978	0.896	1	7-KIR3DL2+ effectors	HNRNPA2B1
LCK	0.000121166836627364	0.396220736498314	0.696	0.529	1	7-KIR3DL2+ effectors	LCK
RALGAPA11	0.000129665274319591	0.418272419521142	0.826	0.707	1	7-KIR3DL2+ effectors	RALGAPA1
DHRS1	0.000133222821867705	0.295223195983123	0.239	0.089	1	7-KIR3DL2+ effectors	DHRS1
MYL6	0.000133757021216419	0.256224637819979	0.978	0.987	1	7-KIR3DL2+ effectors	MYL6
DUSP11	0.000136130797469673	0.393730651430144	0.913	0.887	1	7-KIR3DL2+ effectors	DUSP1
PRMT9	0.000141305192969068	0.317193086296724	0.348	0.163	1	7-KIR3DL2+ effectors	PRMT9
BRAF	0.000144764264819474	0.451789512655892	0.587	0.389	1	7-KIR3DL2+ effectors	BRAF
MATK	0.000144960804486171	0.3320913032755	0.543	0.332	1	7-KIR3DL2+ effectors	MATK
CREM	0.000149018656121375	0.305603443531664	1	0.989	1	7-KIR3DL2+ effectors	CREM
KLHL5	0.00016830960804933	0.257189769876069	0.196	0.063	1	7-KIR3DL2+ effectors	KLHL5
NFATC11	0.000169349417242212	0.342105925387949	0.326	0.143	1	7-KIR3DL2+ effectors	NFATC1
DCP2	0.000171961655120533	0.293747584720244	0.348	0.157	1	7-KIR3DL2+ effectors	DCP2
ZNF184	0.000176579821895903	0.273454173573934	0.217	0.076	1	7-KIR3DL2+ effectors	ZNF184
INSIG11	0.000202915517520514	0.500434777085327	0.739	0.588	1	7-KIR3DL2+ effectors	INSIG1
STAM	0.000210853904384533	0.366449050552667	0.283	0.116	1	7-KIR3DL2+ effectors	STAM
MOB4	0.000212415682838719	0.386165077674338	0.522	0.338	1	7-KIR3DL2+ effectors	MOB4
SRSF51	0.000222700989041819	0.292433480655661	0.935	0.894	1	7-KIR3DL2+ effectors	SRSF5
CYSTM1	0.000223408899296317	0.353891855165738	0.696	0.549	1	7-KIR3DL2+ effectors	CYSTM1
CTSW	0.000227083720392024	0.338791587838776	0.913	0.873	1	7-KIR3DL2+ effectors	CTSW
REL1	0.000229271947442579	0.422033682846071	0.848	0.781	1	7-KIR3DL2+ effectors	REL
SMCHD1	0.000237114165197104	0.5162050008599	0.696	0.553	1	7-KIR3DL2+ effectors	SMCHD1
SRSF31	0.000249667104314153	0.334520767621248	0.87	0.847	1	7-KIR3DL2+ effectors	SRSF3
IFT571	0.000250621211805731	0.417288532369785	0.435	0.248	1	7-KIR3DL2+ effectors	IFT57
B4GALT1	0.000282661101076191	0.461559155959007	0.674	0.562	1	7-KIR3DL2+ effectors	B4GALT1
MAPRE32	0.000286529173124718	0.315993988108937	0.261	0.105	1	7-KIR3DL2+ effectors	MAPRE3
PJA2	0.00029751446986342	0.33967820096858	0.435	0.238	1	7-KIR3DL2+ effectors	PJA2
IGFLR1	0.000297637094941309	0.328749784228991	0.348	0.174	1	7-KIR3DL2+ effectors	IGFLR1
TSPYL2	0.000297722859463295	0.594571019486983	0.761	0.662	1	7-KIR3DL2+ effectors	TSPYL2
LAPTM4A	0.000302058492718795	0.297202027851674	0.739	0.586	1	7-KIR3DL2+ effectors	LAPTM4A
KMT5C	0.000336890426344787	0.332784233566156	0.413	0.223	1	7-KIR3DL2+ effectors	KMT5C
KCTD20	0.000340271731964217	0.362012202343295	0.652	0.509	1	7-KIR3DL2+ effectors	KCTD20
CXorf40A	0.000344548575066375	0.340289036168696	0.326	0.156	1	7-KIR3DL2+ effectors	CXorf40A
NFKB2	0.000379325930088502	0.423359148436997	0.717	0.491	1	7-KIR3DL2+ effectors	NFKB2
CYP2R1	0.000396464914073062	0.363116831837073	0.261	0.11	1	7-KIR3DL2+ effectors	CYP2R1
PITPNC1	0.000411592778325843	0.307085979245394	0.5	0.3	1	7-KIR3DL2+ effectors	PITPNC1
EML4	0.00042160045155515	0.366114662170927	0.913	0.834	1	7-KIR3DL2+ effectors	EML4
DGKD	0.000436687849238819	0.405456323167364	0.326	0.158	1	7-KIR3DL2+ effectors	DGKD
HNRNPU	0.000443524381633856	0.331303452567644	0.826	0.81	1	7-KIR3DL2+ effectors	HNRNPU
AXIN1	0.000454720634377236	0.268191060659442	0.174	0.056	1	7-KIR3DL2+ effectors	AXIN1
TRIM56	0.000479086126995716	0.252698434263607	0.239	0.093	1	7-KIR3DL2+ effectors	TRIM56
ITPKB1	0.000493777358442017	0.326031994233066	0.37	0.189	1	7-KIR3DL2+ effectors	ITPKB
AAED1	0.000496930385063362	0.348815240379783	0.652	0.492	1	7-KIR3DL2+ effectors	AAED1
LYST	0.000502692603580334	0.453104120927601	0.478	0.323	1	7-KIR3DL2+ effectors	LYST
RBM38	0.000522970322099662	0.289902885510008	0.609	0.431	1	7-KIR3DL2+ effectors	RBM38
RFTN1	0.000523668584602236	0.46559252554623	0.522	0.336	1	7-KIR3DL2+ effectors	RFTN1
DDX6	0.000540239509314563	0.335377668861031	0.717	0.592	1	7-KIR3DL2+ effectors	DDX6
STXBP3	0.000591213022331697	0.266103475723804	0.391	0.205	1	7-KIR3DL2+ effectors	STXBP3
SURF41	0.000648511519581262	0.400867791189156	0.804	0.693	1	7-KIR3DL2+ effectors	SURF4
GADD45A	0.000693502843485968	0.369558274122771	0.37	0.193	1	7-KIR3DL2+ effectors	GADD45A
NIN	0.000730936357774164	0.546913538854496	0.37	0.205	1	7-KIR3DL2+ effectors	NIN
ZFP361	0.000779726269711107	0.25686014880946	1	0.996	1	7-KIR3DL2+ effectors	ZFP36
RCN2	0.000804805506448154	0.275578857602996	0.457	0.281	1	7-KIR3DL2+ effectors	RCN2
ITM2A2	0.000848752308368072	0.650392807412856	0.5	0.343	1	7-KIR3DL2+ effectors	ITM2A
CMSS11	0.000855892968675773	0.314813572878596	0.304	0.147	1	7-KIR3DL2+ effectors	CMSS1
PRKX1	0.00087694134573002	0.435087635273092	0.674	0.5	1	7-KIR3DL2+ effectors	PRKX
THAP2	0.000884200300810642	0.426700413150071	0.413	0.262	1	7-KIR3DL2+ effectors	THAP2
GSPT1	0.000889125513340327	0.382043600780619	0.783	0.678	1	7-KIR3DL2+ effectors	GSPT1
ANKRD39	0.0010167241932839	0.281053521320126	0.239	0.104	1	7-KIR3DL2+ effectors	ANKRD39
CSNK1D	0.00104435071530404	0.312949877922227	0.739	0.638	1	7-KIR3DL2+ effectors	CSNK1D
NUP214	0.00106984931361286	0.300599790607895	0.37	0.195	1	7-KIR3DL2+ effectors	NUP214
TMEM156	0.001086110311658	0.281471642504784	0.261	0.114	1	7-KIR3DL2+ effectors	TMEM156
ADSS	0.00111030669454622	0.472589755775921	0.761	0.664	1	7-KIR3DL2+ effectors	ADSS
PGAP11	0.00112948124061954	0.561581854847305	0.37	0.21	1	7-KIR3DL2+ effectors	PGAP1
SLC12A7	0.00120363710843828	0.290851603328901	0.326	0.165	1	7-KIR3DL2+ effectors	SLC12A7
FLNB	0.00124980853737621	0.313702230919821	0.174	0.063	1	7-KIR3DL2+ effectors	FLNB
MANBA	0.00130451645165737	0.382779446318306	0.283	0.136	1	7-KIR3DL2+ effectors	MANBA
RIPOR21	0.00135150134383886	0.345620981041243	0.543	0.374	1	7-KIR3DL2+ effectors	RIPOR2
PSMD13	0.00135487495058493	0.488052297686569	0.565	0.452	1	7-KIR3DL2+ effectors	PSMD13
SPAG4	0.00136222729751235	0.261703244758939	0.283	0.133	1	7-KIR3DL2+ effectors	SPAG4
MPP7	0.00136810984016286	0.309109397442655	0.304	0.155	1	7-KIR3DL2+ effectors	MPP7
PILRB	0.0013914070296474	0.302696318263263	0.239	0.107	1	7-KIR3DL2+ effectors	PILRB
CRIPT	0.00141961463156028	0.299139097101458	0.413	0.237	1	7-KIR3DL2+ effectors	CRIPT
ELOVL5	0.00146769919826381	0.343098297223308	0.826	0.739	1	7-KIR3DL2+ effectors	ELOVL5
HECTD1	0.00154564218088163	0.340566383966963	0.565	0.407	1	7-KIR3DL2+ effectors	HECTD1
SAT1	0.00155677463333314	0.479827578542305	0.957	0.907	1	7-KIR3DL2+ effectors	SAT1
PAPOLA	0.00163979756477107	0.290825861222317	0.674	0.572	1	7-KIR3DL2+ effectors	PAPOLA
MECP2	0.0016737071527424	0.290999432352374	0.609	0.436	1	7-KIR3DL2+ effectors	MECP2
ZFP36L21	0.00174517434594239	0.26475430018606	1	0.989	1	7-KIR3DL2+ effectors	ZFP36L2
JMJD1C	0.00179891342362012	0.343358790009629	0.804	0.774	1	7-KIR3DL2+ effectors	JMJD1C
NASP	0.00181434354556172	0.2869366136026	0.783	0.673	1	7-KIR3DL2+ effectors	NASP
APBB3	0.00190867583615899	0.285117899073752	0.13	0.041	1	7-KIR3DL2+ effectors	APBB3
ATP8A1	0.00203146296693272	0.473227332263539	0.5	0.337	1	7-KIR3DL2+ effectors	ATP8A1
ISG15	0.00209611190450516	0.396547936497216	0.413	0.257	1	7-KIR3DL2+ effectors	ISG15
SHLD1	0.00218320903085799	0.265781158598956	0.283	0.139	1	7-KIR3DL2+ effectors	SHLD1
HNRNPA0	0.00219335264820679	0.338182094193386	0.935	0.883	1	7-KIR3DL2+ effectors	HNRNPA0
BSG	0.00220438354795336	0.28657529210856	0.717	0.612	1	7-KIR3DL2+ effectors	BSG
CHD1	0.00221614297167369	0.376569604547277	0.826	0.684	1	7-KIR3DL2+ effectors	CHD1
RASSF2	0.00226206217919963	0.25634531865389	0.348	0.193	1	7-KIR3DL2+ effectors	RASSF2
EMP11	0.00232125021833075	0.311141424814271	0.326	0.174	1	7-KIR3DL2+ effectors	EMP1
IL161	0.00246905987162175	0.415005521009032	0.413	0.26	1	7-KIR3DL2+ effectors	IL16
JAK1	0.00262170674940966	0.270396945317734	0.848	0.834	1	7-KIR3DL2+ effectors	JAK1
STAG1	0.00270121793832613	0.303486506036683	0.304	0.159	1	7-KIR3DL2+ effectors	STAG1
RANBP2	0.00279150806144985	0.364446888798933	0.761	0.655	1	7-KIR3DL2+ effectors	RANBP2
ZNF10	0.00285605453412929	0.301360686390259	0.326	0.183	1	7-KIR3DL2+ effectors	ZNF10
PHF12	0.00300644641943749	0.327475601250514	0.304	0.169	1	7-KIR3DL2+ effectors	PHF12
RIC8A	0.00307873677929491	0.44242302792768	0.587	0.482	1	7-KIR3DL2+ effectors	RIC8A
ZFP36L11	0.00321673487865516	0.358627095528089	0.804	0.694	1	7-KIR3DL2+ effectors	ZFP36L1
GNPTAB	0.00326289020771708	0.393269969234399	0.304	0.168	1	7-KIR3DL2+ effectors	GNPTAB
NCR31	0.00331847573481225	0.251412289166258	0.457	0.279	1	7-KIR3DL2+ effectors	NCR3
EHD4	0.00350563774598506	0.25814999047895	0.435	0.262	1	7-KIR3DL2+ effectors	EHD4
SLC25A36	0.0037940008520745	0.278536717265824	0.478	0.314	1	7-KIR3DL2+ effectors	SLC25A36
NBL1	0.00380953932648551	0.291491726078076	0.326	0.179	1	7-KIR3DL2+ effectors	NBL1
STRAP	0.00382726912993796	0.284111631335284	0.804	0.765	1	7-KIR3DL2+ effectors	STRAP
LRRC40	0.00395886739102343	0.253526671432363	0.283	0.145	1	7-KIR3DL2+ effectors	LRRC40
STAT32	0.00398940707756997	0.325865306908583	0.804	0.716	1	7-KIR3DL2+ effectors	STAT3
RAB8B1	0.00404335821496998	0.315995615485972	0.478	0.332	1	7-KIR3DL2+ effectors	RAB8B
UBAC2	0.00416587980795464	0.370455816524741	0.435	0.291	1	7-KIR3DL2+ effectors	UBAC2
SAR1A	0.00418715190029799	0.315152135712889	0.609	0.5	1	7-KIR3DL2+ effectors	SAR1A
HBP11	0.00425009524124239	0.400750383089624	0.652	0.493	1	7-KIR3DL2+ effectors	HBP1
ORAI21	0.00456861497579914	0.38621397048857	0.37	0.227	1	7-KIR3DL2+ effectors	ORAI2
PLEKHF2	0.00458101913205248	0.270893839223176	0.304	0.172	1	7-KIR3DL2+ effectors	PLEKHF2
COG1	0.00465979917124696	0.272742106460323	0.304	0.17	1	7-KIR3DL2+ effectors	COG1
ATRX	0.00500263021922726	0.342303190788384	0.565	0.426	1	7-KIR3DL2+ effectors	ATRX
PPP2R5A	0.00528511748804379	0.370244254833005	0.304	0.18	1	7-KIR3DL2+ effectors	PPP2R5A
ACSL3	0.00538698623859508	0.266217490932145	0.413	0.267	1	7-KIR3DL2+ effectors	ACSL3
SEC14L1	0.00554464254823073	0.315235064566334	0.435	0.31	1	7-KIR3DL2+ effectors	SEC14L1
ATM1	0.00555781693384747	0.33338730128762	0.37	0.229	1	7-KIR3DL2+ effectors	ATM
HNRNPA3	0.00560865713404487	0.291933394326165	0.804	0.736	1	7-KIR3DL2+ effectors	HNRNPA3
MAFF1	0.00562270547352125	0.307374741288382	0.196	0.088	1	7-KIR3DL2+ effectors	MAFF
MALAT1	0.00612255925682572	0.284378598414453	1	1	1	7-KIR3DL2+ effectors	MALAT1
ARL4C	0.00614428064947755	0.28573156725262	0.826	0.818	1	7-KIR3DL2+ effectors	ARL4C
TLE4	0.00617545689331154	0.31208485776366	0.478	0.329	1	7-KIR3DL2+ effectors	TLE4
DDX3Y1	0.00618270151848378	0.293680843115799	0.674	0.578	1	7-KIR3DL2+ effectors	DDX3Y
EIF3I	0.00631247312398067	0.29344703339422	0.609	0.541	1	7-KIR3DL2+ effectors	EIF3I
RAB3GAP2	0.00636984295972922	0.29793778885864	0.261	0.138	1	7-KIR3DL2+ effectors	RAB3GAP2
CHRNE	0.00672389388495672	0.292038159016049	0.217	0.108	1	7-KIR3DL2+ effectors	CHRNE
WDR26	0.0068617404072667	0.355244615697864	0.304	0.166	1	7-KIR3DL2+ effectors	WDR26
IRF11	0.0068981111411962	0.323211189406334	0.739	0.689	1	7-KIR3DL2+ effectors	IRF1
REV3L	0.0069191345523422	0.277407546573212	0.326	0.198	1	7-KIR3DL2+ effectors	REV3L
TIMM29	0.00721274192507749	0.254872053398409	0.239	0.122	1	7-KIR3DL2+ effectors	TIMM29
ODF2L1	0.00751113567509534	0.336043675560335	0.478	0.342	1	7-KIR3DL2+ effectors	ODF2L
CAMK43	0.00761015892328864	0.286669691244731	0.304	0.528	1	7-KIR3DL2+ effectors	CAMK4
EWSR1	0.00776504015156277	0.270092332185418	0.761	0.722	1	7-KIR3DL2+ effectors	EWSR1
RNPC3	0.00781339496365485	0.35386556888606	0.261	0.14	1	7-KIR3DL2+ effectors	RNPC3
FNBP1	0.00788085498484043	0.309080529064274	0.739	0.676	1	7-KIR3DL2+ effectors	FNBP1
CLASP2	0.00794241493869795	0.281526005570493	0.326	0.192	1	7-KIR3DL2+ effectors	CLASP2
USP11	0.0081524264248905	0.335141341033139	0.522	0.413	1	7-KIR3DL2+ effectors	USP11
ELL2	0.0081969376631249	0.308891549522849	0.783	0.685	1	7-KIR3DL2+ effectors	ELL2
ANKRD37	0.00881186523279351	0.260112876546743	0.326	0.187	1	7-KIR3DL2+ effectors	ANKRD37
LSR	0.00890275008188318	0.280634639144664	0.348	0.221	1	7-KIR3DL2+ effectors	LSR
TAF7	0.00895608732259531	0.285435703796612	0.565	0.441	1	7-KIR3DL2+ effectors	TAF7
PRKAR1A1	0.00909415851532434	0.409619027590307	0.696	0.613	1	7-KIR3DL2+ effectors	PRKAR1A
STX5	0.00936408565713424	0.257725504881858	0.565	0.403	1	7-KIR3DL2+ effectors	STX5
HSPB11	0.00961025423407196	0.295888727174793	0.435	0.306	1	7-KIR3DL2+ effectors	HSPB1
IL2RB1	0.00962411898286205	0.282265937917086	0.565	0.428	1	7-KIR3DL2+ effectors	IL2RB
DUSP21	0.00993118940405974	0.255808538817681	1	0.954	1	7-KIR3DL2+ effectors	DUSP2

## Sheet: DEGs_UM2_3
	p_val	avg_logFC	pct.1	pct.2	p_val_adj	cluster	gene
ACTN1	1.50063607235645e-167	0.722636664343608	0.455	0.029	5.03283325946905e-163	1-Naive	ACTN1
RPS13	4.31338757508638e-143	0.447377279487744	1	0.999	1.44662392493247e-138	1-Naive	RPS13
LYPD3	1.49285126797848e-142	0.824339133712129	0.511	0.064	5.00672458254622e-138	1-Naive	LYPD3
RPS3A	1.65700121881208e-140	0.400003554869026	1	1	5.55725068765195e-136	1-Naive	RPS3A
RPS5	1.44524124124983e-133	0.483082308091024	1	0.998	4.84705007490369e-129	1-Naive	RPS5
RPL32	3.13430738452162e-127	0.362995616053237	1	1	1.05118401062086e-122	1-Naive	RPL32
EEF1B2	1.6217584845907e-115	0.512347005338754	1	0.984	5.43905360562028e-111	1-Naive	EEF1B2
CCR7	3.15020914689491e-115	0.98468142176043	0.939	0.452	1.05651714368562e-110	1-Naive	CCR7
KDM4B	2.57301264479788e-111	0.652759536275245	0.478	0.075	8.62936980812312e-107	1-Naive	KDM4B
RPS12	1.72026634960678e-109	0.348721651392923	1	1	5.76942928331121e-105	1-Naive	RPS12
RPS8	7.67091667054298e-102	0.353121743227872	1	0.999	2.57267203296671e-97	1-Naive	RPS8
CD55	6.35990376298947e-99	0.801726335350224	0.982	0.78	2.13298452403141e-94	1-Naive	CD55
RPS14	4.07997905350971e-96	0.301093718042054	1	1	1.36834337496609e-91	1-Naive	RPS14
RPL19	4.01002320724869e-95	0.289015656667827	1	0.999	1.34488158324706e-90	1-Naive	RPL19
RPL30	6.69100678380272e-95	0.278781954258593	1	1	2.24402985515176e-90	1-Naive	RPL30
AIF1	1.11585113000737e-93	0.622934945340956	0.545	0.123	3.74234151981871e-89	1-Naive	AIF1
RPS23	1.48705813674281e-90	0.295736472229734	1	1	4.98729557900805e-86	1-Naive	RPS23
RPL13	4.02888291408509e-90	0.298729223498683	1	1	1.35120675172586e-85	1-Naive	RPL13
RPL22	4.02382937665059e-89	0.398521312016024	0.998	0.992	1.34951189634107e-84	1-Naive	RPL22
RPS6	7.65016439623896e-89	0.329274255369888	1	1	2.56571213521062e-84	1-Naive	RPS6
RPS28	1.54522193374487e-87	0.280773824646293	1	1	5.18236532139356e-83	1-Naive	RPS28
LEF1	5.29621715135127e-84	0.718077482246478	0.608	0.191	1.77624530822019e-79	1-Naive	LEF1
RPL9	2.16718837105469e-83	0.350630107940454	1	0.999	7.26831635884323e-79	1-Naive	RPL9
RPL5	2.49425810010568e-82	0.342248082969732	1	0.998	8.36524281613442e-78	1-Naive	RPL5
LINC02446	7.18954412990059e-82	0.809092269850669	0.628	0.206	2.41122931028606e-77	1-Naive	LINC02446
YPEL5	2.16550493342632e-75	0.537980405000748	0.998	0.972	7.26267044572519e-71	1-Naive	YPEL5
RPL18	6.11993975134561e-74	0.271243533121396	1	0.998	2.05250539380629e-69	1-Naive	RPL18
RPS4X	3.72917442098813e-73	0.283371049420599	1	1	1.250690517311e-68	1-Naive	RPS4X
PHLDB3	2.08329812130929e-70	0.535379235474961	0.415	0.094	6.98696523924711e-66	1-Naive	PHLDB3
RPS25	2.28397259734591e-68	0.288964334848613	1	0.999	7.6599872969787e-64	1-Naive	RPS25
SNX9	6.83053412757923e-66	0.576190770369914	0.572	0.181	2.29082453570752e-61	1-Naive	SNX9
CCDC57	8.20917021716038e-66	0.612667556153101	0.556	0.186	2.75319150743125e-61	1-Naive	CCDC57
JUNB	1.6038634558377e-64	0.668724425298665	0.991	0.939	5.37903725818847e-60	1-Naive	JUNB
RGS10	1.43454975794236e-61	0.679537529616374	0.776	0.443	4.81119297818709e-57	1-Naive	RGS10
NELL2	5.80900787345414e-61	0.598479790707747	0.635	0.248	1.94822506059905e-56	1-Naive	NELL2
PABPC1	1.15730253810655e-60	0.35668149032906	1	0.996	3.88136125230174e-56	1-Naive	PABPC1
SCML1	5.02953697998574e-50	0.358185035882304	0.242	0.041	1.68680611234762e-45	1-Naive	SCML1
PASK	4.63549688017042e-49	0.594477063913377	0.578	0.239	1.55465294367156e-44	1-Naive	PASK
TRABD2A	5.94947679977965e-47	0.293813793112831	0.235	0.04	1.9953355291101e-42	1-Naive	TRABD2A
SLC2A3	1.41912489433484e-46	0.516945712442347	0.982	0.872	4.7594610706202e-42	1-Naive	SLC2A3
NDFIP1	1.88508717278853e-46	0.538847669132043	0.796	0.481	6.32220536009817e-42	1-Naive	NDFIP1
RPL10A	1.79562148233267e-45	0.266038543289165	1	0.995	6.0221553274473e-41	1-Naive	RPL10A
PTP4A1	1.63913047815587e-43	0.599373160905559	0.778	0.487	5.49731579763915e-39	1-Naive	PTP4A1
CTH	1.81224324875391e-43	0.528407829220578	0.307	0.08	6.07790140767085e-39	1-Naive	CTH
RIC3	5.52563763473524e-43	0.332069393066987	0.238	0.046	1.85318834993751e-38	1-Naive	RIC3
ALG13	4.90288801722269e-41	0.573290727548498	0.747	0.437	1.64433058321615e-36	1-Naive	ALG13
SARAF	1.18644270543478e-40	0.336617777072941	1	0.986	3.97909154548715e-36	1-Naive	SARAF
SC5D	1.77823468786625e-39	0.533737059743202	0.585	0.283	5.96384349616582e-35	1-Naive	SC5D
MAL	2.88703254819561e-39	0.388907640073267	0.383	0.126	9.68252976013843e-35	1-Naive	MAL
NPM1	6.24122693016918e-39	0.284367975108486	0.991	0.982	2.09318268784014e-34	1-Naive	NPM1
SH3YL1	6.02639558639861e-38	0.339099237366539	0.283	0.073	2.02113255176637e-33	1-Naive	SH3YL1
ABLIM1	2.84554468696194e-37	0.570894816397653	0.753	0.451	9.54338777113294e-33	1-Naive	ABLIM1
RPL7	5.13277108976864e-36	0.271611546000907	0.998	0.971	1.72142876808661e-31	1-Naive	RPL7
SPINT2	7.98448636256536e-36	0.309647858824143	0.3	0.086	2.67783703627717e-31	1-Naive	SPINT2
LDHB	4.23456722041886e-35	0.369873733787726	0.948	0.79	1.42018915438408e-30	1-Naive	LDHB
BACH2	1.03040412368243e-34	0.472704881988285	0.487	0.212	3.45576935000614e-30	1-Naive	BACH2
ZNF331	1.01712345217909e-32	0.420534017763311	0.91	0.723	3.41122863391822e-28	1-Naive	ZNF331
FTH1	2.08191178401429e-31	0.294319383086632	1	1	6.98231574122714e-27	1-Naive	FTH1
RHOH	3.20459295165102e-31	0.422317361996126	0.868	0.648	1.07475638412472e-26	1-Naive	RHOH
SNN	1.41224330605992e-30	0.335671013706631	0.258	0.075	4.73638159986378e-26	1-Naive	SNN
CHKA	1.42190449172425e-30	0.269407094345593	0.224	0.056	4.76878328434481e-26	1-Naive	CHKA
ZNF10	6.45652257327375e-30	0.344929488028796	0.341	0.121	2.16538854062455e-25	1-Naive	ZNF10
EIF3E	1.59762630060324e-29	0.352518721291336	0.919	0.74	5.35811908696316e-25	1-Naive	EIF3E
SNHG8	5.35416923824802e-29	0.353880200666261	0.886	0.701	1.79568127912362e-24	1-Naive	SNHG8
MGAT4A	8.06546596855738e-29	0.412296207436167	0.655	0.373	2.70499597653478e-24	1-Naive	MGAT4A
GEM	4.23745858752779e-28	0.317949678258402	0.15	0.029	1.42115886108507e-23	1-Naive	GEM
PCSK1N	4.89738790063492e-28	0.313747580611985	0.209	0.054	1.64248595411494e-23	1-Naive	PCSK1N
SLC5A6	8.69853493824157e-28	0.289425767347997	0.265	0.083	2.91731464758746e-23	1-Naive	SLC5A6
WDR74	2.2840710982858e-27	0.428765822173139	0.612	0.347	7.66031764943092e-23	1-Naive	WDR74
YBX3	2.40898607151748e-27	0.442131440511228	0.65	0.389	8.07925748665531e-23	1-Naive	YBX3
HNRNPA0	3.82832603340401e-27	0.328779338763016	0.917	0.788	1.28394398508304e-22	1-Naive	HNRNPA0
HSPH1	3.37145625265701e-26	0.411562594848952	0.796	0.573	1.13071899801611e-21	1-Naive	HSPH1
MYC	5.14334741990014e-26	0.385416369832402	0.269	0.09	1.72497585768611e-21	1-Naive	MYC
EIF3H	2.43233381920493e-24	0.313407684801573	0.892	0.755	8.15756116284948e-20	1-Naive	EIF3H
CHMP1B	3.3862844617976e-24	0.506577024475891	0.742	0.532	1.13569208279768e-19	1-Naive	CHMP1B
FBL	4.73896936553327e-24	0.345797011877752	0.726	0.483	1.58935554581255e-19	1-Naive	FBL
FOXP1	1.28991322143336e-23	0.350352020717092	0.632	0.378	4.32611096204321e-19	1-Naive	FOXP1
FLT3LG	1.44235631148505e-23	0.362729144721341	0.765	0.519	4.83737459745856e-19	1-Naive	FLT3LG
TSPYL1	1.60529959238789e-23	0.332832297284857	0.527	0.282	5.38385377295051e-19	1-Naive	TSPYL1
SATB1	1.23126020430295e-22	0.357076455486606	0.529	0.287	4.12940047319122e-18	1-Naive	SATB1
NR4A2	1.59479724155675e-22	0.284132962732225	0.973	0.934	5.34863098873301e-18	1-Naive	NR4A2
RNF138	2.28434594871879e-22	0.353164421622588	0.592	0.351	7.66123944281307e-18	1-Naive	RNF138
HIST1H4C	2.87855973490573e-22	0.327926269761879	0.904	0.758	9.65411363892684e-18	1-Naive	HIST1H4C
ARRDC2	5.01013976110944e-22	0.367217727465167	0.406	0.194	1.68030067308088e-17	1-Naive	ARRDC2
CXorf40A	6.92376341824547e-22	0.294071511325601	0.244	0.087	2.32209177521117e-17	1-Naive	CXorf40A
PRMT9	9.12599383228423e-22	0.26784362151357	0.309	0.124	3.06067581147148e-17	1-Naive	PRMT9
OXNAD1	5.59020362840623e-21	0.311553361208277	0.475	0.25	1.87484249289488e-16	1-Naive	OXNAD1
PDE3B	6.35531468289408e-21	0.348527235785924	0.513	0.283	2.13144543834902e-16	1-Naive	PDE3B
TGFBR2	3.15931216359548e-20	0.277087362630976	0.39	0.182	1.05957011342665e-15	1-Naive	TGFBR2
ZEB1	3.91371998601124e-19	0.268401135136125	0.265	0.106	1.31258340890845e-14	1-Naive	ZEB1
TMEM243	7.2266723375393e-19	0.33959351123163	0.513	0.3	2.42368136856393e-14	1-Naive	TMEM243
FAM177A1	8.85113950988014e-19	0.280357493227718	0.915	0.843	2.9684951688236e-14	1-Naive	FAM177A1
SF1	2.2577708171281e-18	0.258172805591998	0.939	0.827	7.57211176648421e-14	1-Naive	SF1
CSRNP1	5.8370998750272e-18	0.280158740950812	0.906	0.772	1.95764655608662e-13	1-Naive	CSRNP1
EIF2S3	1.130405681087e-17	0.299286278554721	0.668	0.43	3.79115457322957e-13	1-Naive	EIF2S3
FOSB	1.21884220991954e-17	0.276565951726287	0.957	0.874	4.08775300362817e-13	1-Naive	FOSB
KLF2	3.47084884863012e-17	0.291271497234922	0.879	0.726	1.16405328685357e-12	1-Naive	KLF2
MAD1L1	4.29997241058525e-17	0.27836806241679	0.283	0.124	1.44212474706208e-12	1-Naive	MAD1L1
SELL	4.7615023310698e-17	0.302496718560579	0.561	0.336	1.59691265179419e-12	1-Naive	SELL
C6orf48	1.40078694106966e-16	0.259177119629787	0.498	0.283	4.69795924295943e-12	1-Naive	C6orf48
ALKBH7	1.46090443517498e-16	0.295596402456805	0.554	0.346	4.89958129468986e-12	1-Naive	ALKBH7
AGPAT5	2.20617402058307e-16	0.260448619383239	0.291	0.134	7.3990664302315e-12	1-Naive	AGPAT5
THAP2	5.84996004955883e-16	0.336330101891952	0.363	0.189	1.96195960142104e-11	1-Naive	THAP2
BCL11B	6.77898881949271e-16	0.260578229162748	0.406	0.214	2.27353727028146e-11	1-Naive	BCL11B
PELI1	2.81691350908756e-15	0.254724927203671	0.321	0.155	9.44736452677785e-11	1-Naive	PELI1
HNRNPU	4.51138372931765e-15	0.300287742779261	0.796	0.597	1.51302787513855e-10	1-Naive	HNRNPU
VPS37B	5.22348403617924e-15	0.271205284244133	0.796	0.623	1.75185207605379e-10	1-Naive	VPS37B
TMEM123	1.69111456861835e-14	0.273922872460773	0.65	0.435	5.67166004023223e-10	1-Naive	TMEM123
AREG	4.6184179994394e-14	0.294249083366306	0.525	0.326	1.54892502865198e-09	1-Naive	AREG
LSR	1.16624240228592e-13	0.262665758362228	0.334	0.177	3.91134376878653e-09	1-Naive	LSR
PIK3IP1	1.42729192466707e-13	0.270224839012245	0.578	0.375	4.78685165694841e-09	1-Naive	PIK3IP1
NOSIP	1.54345472986128e-13	0.28511394506361	0.803	0.62	5.17643847300876e-09	1-Naive	NOSIP
ARG2	1.87666792008397e-13	0.277047143191848	0.309	0.159	6.29396887037762e-09	1-Naive	ARG2
MARCKSL1	3.97364319355132e-13	0.284401632625018	0.686	0.516	1.33268045425324e-08	1-Naive	MARCKSL1
HSPB1	4.47465465657256e-13	0.254582744538299	0.435	0.256	1.50070967872131e-08	1-Naive	HSPB1
2006-09-01	6.16366115870397e-13	0.27061050055505	0.668	0.47	2.06716867940614e-08	1-Naive	2006-09-01
ANP32B	7.58495112492319e-13	0.260247953172244	0.729	0.563	2.54384090827674e-08	1-Naive	ANP32B
NDUFV2	2.98017575062183e-12	0.26350440830749	0.751	0.582	9.99491343243549e-08	1-Naive	NDUFV2
S100B	4.30093340289737e-12	0.347477043753586	0.224	0.108	1.44244704466372e-07	1-Naive	S100B
NANS	5.35408480206488e-12	0.25240807849561	0.444	0.271	1.79565296091652e-07	1-Naive	NANS
TCF7	2.04223148458094e-11	0.262182904358334	0.437	0.273	6.84923595298755e-07	1-Naive	TCF7
ATP1B3	3.78094100813306e-11	0.28520387715154	0.702	0.562	1.26805199530767e-06	1-Naive	ATP1B3
STAT3	5.53228986005812e-10	0.251142966914433	0.659	0.479	1.85541937326629e-05	1-Naive	STAT3
ID3	3.78271015924602e-08	0.262465327245516	0.184	0.094	0.00126864533320793	1-Naive	ID3
AL138963.3	0.000137547079132318	0.293000708974863	0.383	0.285	1	1-Naive	AL138963.3
GNLY	0	3.0909431517487	0.84	0.108	0	2-Cytotoxic effectors	GNLY
S100A4	7.51705381189854e-177	0.881104732176825	0.991	0.842	2.52106950743453e-172	2-Cytotoxic effectors	S100A4
GZMB	3.6023861355137e-162	1.16537735017801	0.62	0.12	1.20816826212858e-157	2-Cytotoxic effectors	GZMB
NKG7	4.73607429899628e-135	0.815528716043848	0.984	0.558	1.58838459839737e-130	2-Cytotoxic effectors	NKG7
IL32	5.25361239903614e-133	0.761973346638069	0.982	0.743	1.76195652638874e-128	2-Cytotoxic effectors	IL32
GZMH	4.68510913546534e-119	0.967441365518735	0.636	0.176	1.57129190185237e-114	2-Cytotoxic effectors	GZMH
CD52	3.45411594273049e-116	0.610549711117929	0.982	0.923	1.15844140487295e-111	2-Cytotoxic effectors	CD52
GZMA	2.82944679769644e-114	0.763706438689338	0.818	0.335	9.48939867011433e-110	2-Cytotoxic effectors	GZMA
B2M	5.07612767362353e-105	0.264305581974869	1	1	1.70243169917986e-100	2-Cytotoxic effectors	B2M
SH3BGRL3	1.84687844665065e-103	0.50454426082992	0.998	0.98	6.19406093437693e-99	2-Cytotoxic effectors	SH3BGRL3
CCL5	2.95558795291155e-93	0.629881898113295	0.995	0.633	9.91245087647475e-89	2-Cytotoxic effectors	CCL5
PRF1	2.20112198563158e-91	0.698761586114969	0.639	0.23	7.3821229154112e-87	2-Cytotoxic effectors	PRF1
FLNA	9.02287220977672e-84	0.685439942329791	0.807	0.518	3.02609088171492e-79	2-Cytotoxic effectors	FLNA
CEBPD	3.78263983568777e-75	0.619736662939776	0.22	0.016	1.26862174809297e-70	2-Cytotoxic effectors	CEBPD
ALOX5AP	2.17865972267848e-71	0.719365826513571	0.453	0.155	7.30678897791909e-67	2-Cytotoxic effectors	ALOX5AP
KLRD1	1.22111161633611e-67	0.532175949916353	0.484	0.157	4.09536413886806e-63	2-Cytotoxic effectors	KLRD1
PTMS	1.13854744925922e-63	0.379822531257227	0.221	0.025	3.81846043532557e-59	2-Cytotoxic effectors	PTMS
CLIC1	6.47837861872797e-62	0.482692964906166	0.828	0.556	2.17271862114899e-57	2-Cytotoxic effectors	CLIC1
BHLHE40	3.37954196379809e-59	0.536316351924614	0.661	0.341	1.1334307838186e-54	2-Cytotoxic effectors	BHLHE40
FGFBP2	4.83745667745528e-59	0.743048082686007	0.415	0.136	1.62238622048495e-54	2-Cytotoxic effectors	FGFBP2
LYAR	5.05066346687057e-59	0.517595771988665	0.705	0.394	1.69389151351905e-54	2-Cytotoxic effectors	LYAR
S100A10	2.28215319275569e-56	0.428223527798119	0.967	0.865	7.65388537786402e-52	2-Cytotoxic effectors	S100A10
PFN1	2.49691986961078e-54	0.338239097515554	0.996	0.966	8.37416985870063e-50	2-Cytotoxic effectors	PFN1
CD8B	1.17682456484585e-49	0.407705234458687	0.907	0.818	3.94683422558e-45	2-Cytotoxic effectors	CD8B
PIM1	1.13311066767395e-46	0.530982688184655	0.555	0.296	3.80022655724489e-42	2-Cytotoxic effectors	PIM1
ZNF683	1.20213900593521e-46	0.469069073484138	0.226	0.047	4.0317337981055e-42	2-Cytotoxic effectors	ZNF683
CXCR3	1.81980183662978e-45	0.527852089783389	0.6	0.316	6.10325139968896e-41	2-Cytotoxic effectors	CXCR3
LDHA	2.11839445835649e-45	0.299339720583642	0.975	0.933	7.10467133443599e-41	2-Cytotoxic effectors	LDHA
RAB34	2.08959994567684e-44	0.255994088265751	0.144	0.014	7.00810029781098e-40	2-Cytotoxic effectors	RAB34
OASL	3.35716862770871e-44	0.498890748987887	0.581	0.302	1.12592721436095e-39	2-Cytotoxic effectors	OASL
CXCR6	2.60676540869007e-43	0.372569659795853	0.162	0.021	8.74256982766475e-39	2-Cytotoxic effectors	CXCR6
C12orf75	7.76518274230296e-43	0.446322338957907	0.59	0.327	2.60428698811357e-38	2-Cytotoxic effectors	C12orf75
SPOCK2	8.27801224358066e-43	0.384167756819076	0.916	0.805	2.77627974625208e-38	2-Cytotoxic effectors	SPOCK2
LAPTM5	5.97648965160272e-42	0.309709399156879	0.957	0.92	2.00439509935452e-37	2-Cytotoxic effectors	LAPTM5
MATK	7.0266614581332e-42	0.419348845829538	0.555	0.291	2.35660171982871e-37	2-Cytotoxic effectors	MATK
GNA15	1.4448713557077e-41	0.328923256212844	0.156	0.021	4.84580955277249e-37	2-Cytotoxic effectors	GNA15
PROK2	4.63667621126877e-41	0.270465697957324	0.102	0.003	1.55504846773532e-36	2-Cytotoxic effectors	PROK2
NPDC1	8.02434083577227e-41	0.399998604676653	0.338	0.125	2.6912034295013e-36	2-Cytotoxic effectors	NPDC1
S100B1	6.23655530462155e-39	0.551316003332486	0.254	0.072	2.09161591806398e-34	2-Cytotoxic effectors	S100B
GZMK	7.07332948049805e-39	0.585801330896997	0.618	0.39	2.37225324116944e-34	2-Cytotoxic effectors	GZMK
COL6A2	1.40776185552944e-38	0.302794520575526	0.208	0.047	4.72135171107463e-34	2-Cytotoxic effectors	COL6A2
CD99	1.59968245132973e-38	0.387695586992006	0.871	0.728	5.36501500526963e-34	2-Cytotoxic effectors	CD99
ITGA5	1.99429645019797e-37	0.316709199557155	0.247	0.071	6.68847143467395e-33	2-Cytotoxic effectors	ITGA5
ANXA5	4.0959088789907e-37	0.473213328979685	0.544	0.328	1.3736859198359e-32	2-Cytotoxic effectors	ANXA5
LSP1	1.63966767401578e-36	0.318925275683491	0.904	0.794	5.49911744511413e-32	2-Cytotoxic effectors	LSP1
CD8A	5.38003521846501e-36	0.266259072096913	0.957	0.895	1.80435621156879e-31	2-Cytotoxic effectors	CD8A
S100A6	6.51151261841132e-36	0.359207061784594	0.936	0.871	2.18383110196279e-31	2-Cytotoxic effectors	S100A6
AHNAK	1.52945448264717e-30	0.349944359885546	0.747	0.557	5.12948444390209e-26	2-Cytotoxic effectors	AHNAK
TGFB1	4.04912725841158e-29	0.272199251463776	0.897	0.771	1.35799629992608e-24	2-Cytotoxic effectors	TGFB1
LAG3	1.00995934943496e-28	0.327999335269296	0.308	0.128	3.38720166613496e-24	2-Cytotoxic effectors	LAG3
ITGB2	2.60051008717302e-28	0.275365722193284	0.839	0.68	8.72159073036088e-24	2-Cytotoxic effectors	ITGB2
HCST	5.39363617832415e-28	0.270812212651591	0.91	0.855	1.80891770148635e-23	2-Cytotoxic effectors	HCST
ARPC5L	6.70713358877931e-28	0.323785678232655	0.413	0.217	2.2494384630048e-23	2-Cytotoxic effectors	ARPC5L
TNFRSF25	2.77264003128342e-26	0.314869621336921	0.231	0.089	9.29888013691833e-22	2-Cytotoxic effectors	TNFRSF25
RORA	3.80712933477065e-26	0.365425740293451	0.585	0.402	1.27683503629538e-21	2-Cytotoxic effectors	RORA
DSTN	6.18604779741049e-26	0.402237846926702	0.545	0.367	2.07467671029553e-21	2-Cytotoxic effectors	DSTN
ATP2B4	1.39451751680728e-25	0.332443676350291	0.307	0.138	4.67693284786827e-21	2-Cytotoxic effectors	ATP2B4
LGALS1	1.74874011810108e-25	0.574473323098896	0.489	0.307	5.86492460808741e-21	2-Cytotoxic effectors	LGALS1
GRAMD1B	1.28087049024839e-24	0.270605984707317	0.214	0.076	4.29578345019504e-20	2-Cytotoxic effectors	GRAMD1B
EFHD2	2.20722317632511e-24	0.32118534948486	0.455	0.266	7.40258508875914e-20	2-Cytotoxic effectors	EFHD2
NAA50	1.38394911647058e-23	0.291476954415573	0.415	0.23	4.64148854681902e-19	2-Cytotoxic effectors	NAA50
SRRT	2.09559560605139e-23	0.292992047787829	0.679	0.474	7.02820854357515e-19	2-Cytotoxic effectors	SRRT
CYTOR	3.84565949466663e-23	0.357135739555526	0.312	0.153	1.28975728132129e-18	2-Cytotoxic effectors	CYTOR
HOPX	6.26729419382293e-23	0.281306969189078	0.547	0.337	2.10192512672433e-18	2-Cytotoxic effectors	HOPX
GTF3C1	8.6458013372506e-23	0.290470229821336	0.399	0.217	2.89962885248711e-18	2-Cytotoxic effectors	GTF3C1
CCL4	2.40791304343895e-22	0.700727756561051	0.367	0.189	8.07565876508557e-18	2-Cytotoxic effectors	CCL4
GYG1	1.25975668358557e-21	0.346743245789306	0.434	0.256	4.2249719654093e-17	2-Cytotoxic effectors	GYG1
AKNA	6.23225347186431e-21	0.305469444147312	0.558	0.386	2.09017316939385e-16	2-Cytotoxic effectors	AKNA
MSN	2.74559561684133e-20	0.314602636310114	0.646	0.515	9.20817857976245e-16	2-Cytotoxic effectors	MSN
SYNE1	7.43968746186422e-20	0.302139367944714	0.33	0.173	2.49512238096002e-15	2-Cytotoxic effectors	SYNE1
ITGB1	7.45044775441256e-20	0.314119707855791	0.569	0.387	2.49873116787488e-15	2-Cytotoxic effectors	ITGB1
SKI	9.05803170017355e-20	0.294039268448742	0.344	0.192	3.03788267160421e-15	2-Cytotoxic effectors	SKI
CAST	9.39371704191107e-20	0.324498793000686	0.537	0.381	3.15046482151614e-15	2-Cytotoxic effectors	CAST
CD2	9.97304266451142e-20	0.276595911642255	0.639	0.479	3.34475904882384e-15	2-Cytotoxic effectors	CD2
CCDC107	1.29827041430437e-19	0.266129692428908	0.361	0.206	4.35413931549398e-15	2-Cytotoxic effectors	CCDC107
MYO1F	1.52346601817218e-19	0.293298955380319	0.377	0.214	5.10940033174585e-15	2-Cytotoxic effectors	MYO1F
CERK	1.78337437555742e-19	0.27976154423628	0.247	0.114	5.98108098074447e-15	2-Cytotoxic effectors	CERK
LCP1	1.79046609042304e-19	0.270918533395426	0.722	0.579	6.00486517406079e-15	2-Cytotoxic effectors	LCP1
MYL12A	7.95940938908564e-19	0.259967762947292	0.866	0.781	2.66942672091154e-14	2-Cytotoxic effectors	MYL12A
SYNE2	1.15627953711962e-18	0.309270622465588	0.59	0.438	3.87793031159179e-14	2-Cytotoxic effectors	SYNE2
CTSC	1.12397232346784e-17	0.295126346470314	0.386	0.234	3.76957837844646e-13	2-Cytotoxic effectors	CTSC
MYH9	1.63950046202662e-17	0.285911311077003	0.698	0.587	5.49855664954489e-13	2-Cytotoxic effectors	MYH9
CD3G	2.76596928680521e-17	0.267053405347644	0.655	0.516	9.27650779408731e-13	2-Cytotoxic effectors	CD3G
ICAM3	3.73567548227988e-17	0.250970291630368	0.738	0.637	1.25287084324702e-12	2-Cytotoxic effectors	ICAM3
PERP	5.24450823789357e-17	0.274900887779993	0.308	0.171	1.75890317282475e-12	2-Cytotoxic effectors	PERP
RUNX3	8.71625353464348e-17	0.288874114514839	0.662	0.551	2.92325711044873e-12	2-Cytotoxic effectors	RUNX3
GBP5	1.67800330587047e-16	0.271537860120465	0.247	0.12	5.62768748722837e-12	2-Cytotoxic effectors	GBP5
ATP6V0B	1.76957059928493e-15	0.25682439776647	0.457	0.313	5.93478587588181e-11	2-Cytotoxic effectors	ATP6V0B
DUSP4	3.68045560478419e-14	0.31711961483598	0.362	0.224	1.23435120073252e-09	2-Cytotoxic effectors	DUSP4
ZC3H12A	6.1570622576543e-13	0.316145600567305	0.419	0.306	2.0649555399721e-08	2-Cytotoxic effectors	ZC3H12A
SPON2	5.18076322843203e-12	0.250273253205939	0.15	0.069	1.73752437155154e-07	2-Cytotoxic effectors	SPON2
HSPA1A	6.37400368432887e-05	0.262414517496384	0.131	0.083	1	2-Cytotoxic effectors	HSPA1A
LMNA	2.82263123633645e-82	0.854442593998432	0.982	0.815	9.46654064042518e-78	3-Activated	LMNA
FOS	1.16151598989437e-74	0.724394316711896	0.982	0.835	3.89549232690774e-70	3-Activated	FOS
MT-CYB	7.5373923726227e-73	0.368384106345688	1	1	2.5278906539302e-68	3-Activated	MT-CYB
ZFP36	3.59380331500275e-69	0.509398556375762	1	0.994	1.20528975578562e-64	3-Activated	ZFP36
EZR	2.1809101888794e-67	0.512417328187794	0.992	0.966	7.31433659146372e-63	3-Activated	EZR
RGCC	5.069024953181e-65	0.532581073677294	0.99	0.953	1.70004958879784e-60	3-Activated	RGCC
MT-ND2	2.46739979896092e-63	0.468627458342391	0.994	0.966	8.27516544575512e-59	3-Activated	MT-ND2
FOSB1	1.54446307729076e-62	0.580132038405286	0.963	0.871	5.17982026861777e-58	3-Activated	FOSB
H3F3B	1.46097324381205e-60	0.351221302232464	1	1	4.89981206509684e-56	3-Activated	H3F3B
ZFP36L2	2.5786527215232e-57	0.488122875172973	0.998	0.987	8.64828549744451e-53	3-Activated	ZFP36L2
BTG1	5.47228885423282e-56	0.414588926069036	1	0.994	1.8352962359326e-51	3-Activated	BTG1
FTH11	2.67574262995105e-51	0.438098956817703	1	1	8.97390563232984e-47	3-Activated	FTH1
GADD45B	2.00200726768297e-49	0.63974705525435	0.884	0.714	6.71433197435515e-45	3-Activated	GADD45B
DNAJB1	8.48458797721706e-45	0.435932756841549	0.971	0.905	2.84556111579906e-40	3-Activated	DNAJB1
TUBB4B	4.16339280619158e-44	0.501443278946174	0.943	0.866	1.39631867934053e-39	3-Activated	TUBB4B
KLF6	4.05711078383573e-43	0.530498944103738	0.961	0.84	1.36067381468283e-38	3-Activated	KLF6
MT-ND3	4.3862499495287e-42	0.257937949014409	1	1	1.47106050807294e-37	3-Activated	MT-ND3
MT-ND4	3.46362034842141e-40	0.329103169105701	1	0.994	1.16162899245357e-35	3-Activated	MT-ND4
EIF1	2.40109309269838e-39	0.252074181128148	1	1	8.05278601429182e-35	3-Activated	EIF1
MT-ND4L	1.52016701036841e-38	0.257726899603401	0.998	0.999	5.09833611937356e-34	3-Activated	MT-ND4L
CXCR4	1.79639508315222e-38	0.350939436975075	0.996	0.984	6.02474982987593e-34	3-Activated	CXCR4
UBC	1.02132481506109e-37	0.262057671820988	1	0.999	3.4253191647519e-33	3-Activated	UBC
PPP1R15A	2.80427688524076e-37	0.496154908779051	0.888	0.767	9.40498381772044e-33	3-Activated	PPP1R15A
JUNB1	3.34357046203831e-37	0.491270867268808	0.978	0.94	1.12136666155841e-32	3-Activated	JUNB
DUSP1	1.22701248522244e-36	0.471004048661097	0.961	0.879	4.11515447293903e-32	3-Activated	DUSP1
PLK3	1.77648755926743e-36	0.454389407287378	0.79	0.586	5.95798397627112e-32	3-Activated	PLK3
SQSTM1	1.5074988400582e-35	0.527627306377078	0.896	0.804	5.05584960978719e-31	3-Activated	SQSTM1
CDKN1A	5.11006194413146e-35	0.580079771507322	0.707	0.508	1.71381257482281e-30	3-Activated	CDKN1A
NR4A21	7.69857520086199e-35	0.454025449983912	0.984	0.931	2.58194815086509e-30	3-Activated	NR4A2
MT-ND1	1.47706227073299e-33	0.260485867126601	0.998	0.995	4.95377144358431e-29	3-Activated	MT-ND1
GZMK1	2.31294528115503e-33	0.486281192835285	0.709	0.403	7.75715588393774e-29	3-Activated	GZMK
JUN	2.44959530751579e-33	0.707732331299205	0.843	0.647	8.21545274234645e-29	3-Activated	JUN
PHLDA1	4.97636152467887e-32	0.628758937302424	0.428	0.208	1.6689721281468e-27	3-Activated	PHLDA1
TUBA1A	1.9527262758171e-31	0.401519156893049	0.947	0.853	6.5490533838354e-27	3-Activated	TUBA1A
TUBB2A	6.13039219276279e-31	0.531989187785529	0.648	0.421	2.05601093360879e-26	3-Activated	TUBB2A
DNAJA1	2.01670111655236e-29	0.419217492516111	0.947	0.874	6.76361220469331e-25	3-Activated	DNAJA1
CD69	2.78851530008966e-27	0.544212052423488	0.815	0.648	9.35212261344069e-23	3-Activated	CD69
TSC22D3	4.22556462430922e-27	0.332395236633842	0.99	0.976	1.41716986370083e-22	3-Activated	TSC22D3
MARCKSL11	1.03389534082706e-26	0.534831514166518	0.682	0.513	3.46747819406579e-22	3-Activated	MARCKSL1
SLC2A31	1.15757950393333e-26	0.369580056183705	0.945	0.878	3.8822901402916e-22	3-Activated	SLC2A3
FUS	1.57082722673352e-26	0.369182283491598	0.955	0.884	5.26824035301888e-22	3-Activated	FUS
CCR71	1.34253835146467e-25	0.447717560957403	0.735	0.487	4.5026051231422e-21	3-Activated	CCR7
CSRNP11	2.22972297586435e-25	0.308387011687154	0.906	0.769	7.47804491645386e-21	3-Activated	CSRNP1
MCL1	2.04974381292064e-24	0.305349915962501	0.986	0.937	6.87443079977324e-20	3-Activated	MCL1
ANXA1	3.76628305395968e-24	0.374589622725629	0.961	0.901	1.263136010637e-19	3-Activated	ANXA1
FXYD7	9.58220444648139e-23	0.305782910784878	0.238	0.088	3.21367972726093e-18	3-Activated	FXYD7
ID1	1.61010096172114e-22	0.316728253152294	0.189	0.058	5.39995660542037e-18	3-Activated	ID1
SLC16A3	2.88828687232731e-21	0.392414502033824	0.527	0.336	9.68673651241132e-17	3-Activated	SLC16A3
TUBA1B	7.06803444080654e-21	0.339367857693804	0.908	0.821	2.3704773907577e-16	3-Activated	TUBA1B
GTF2B	8.17970404149732e-21	0.355977845988021	0.798	0.677	2.74330914143737e-16	3-Activated	GTF2B
ZNF3311	9.70001790502531e-21	0.345075974057668	0.859	0.73	3.25319200498739e-16	3-Activated	ZNF331
NEU1	1.0232549184731e-20	0.537817904520006	0.58	0.405	3.43179234557509e-16	3-Activated	NEU1
SNX91	1.12389736993987e-20	0.346981600385711	0.399	0.211	3.76932699930434e-16	3-Activated	SNX9
MLF1	1.03098126098673e-19	0.377882891816946	0.387	0.21	3.45770495309731e-15	3-Activated	MLF1
SGK1	2.57510580014041e-19	0.376407500763255	0.316	0.155	8.6363898325109e-15	3-Activated	SGK1
SAP18	3.42926024236728e-18	0.286137879989219	0.902	0.859	1.15010530008514e-13	3-Activated	SAP18
MT1X	4.0362732753604e-18	0.440837786826792	0.615	0.465	1.35368533109037e-13	3-Activated	MT1X
SERTAD1	5.40034709102318e-18	0.374196530029811	0.713	0.56	1.81116840738736e-13	3-Activated	SERTAD1
DDX3X	1.65970929191692e-17	0.368763188352023	0.804	0.699	5.56633302323096e-13	3-Activated	DDX3X
AREG1	2.38849812420983e-17	0.43684291260893	0.503	0.327	8.01054500897492e-13	3-Activated	AREG
LSR1	6.26377559470254e-17	0.309863259957846	0.326	0.176	2.10074505895134e-12	3-Activated	LSR
EIF4A3	8.74652354305384e-17	0.303829298482029	0.823	0.735	2.9334090658694e-12	3-Activated	EIF4A3
CYCS	2.66169438927169e-16	0.267286611033057	0.823	0.736	8.9267906427394e-12	3-Activated	CYCS
H2AFX	2.78797921852709e-16	0.330912791607644	0.668	0.504	9.35032470309614e-12	3-Activated	H2AFX
NELL21	3.65829588564586e-16	0.298075590150313	0.448	0.281	1.22691927412791e-11	3-Activated	NELL2
GSTM3	3.9797777929982e-16	0.292900845401508	0.234	0.108	1.33473787621574e-11	3-Activated	GSTM3
IL7R	7.6569997260145e-16	0.276457200628613	0.9	0.724	2.56800456811074e-11	3-Activated	IL7R
CITED2	8.4446412530402e-16	0.445048936355044	0.642	0.495	2.83216378344462e-11	3-Activated	CITED2
AMD1	8.68011689934022e-16	0.319650895593912	0.719	0.616	2.91113760570072e-11	3-Activated	AMD1
KDM6B	1.71168044957638e-15	0.348373809688368	0.611	0.475	5.74063389178927e-11	3-Activated	KDM6B
NFKBIA	1.93382131981758e-15	0.2762619993192	0.888	0.795	6.4856499424042e-11	3-Activated	NFKBIA
RHOB	3.93516787756201e-15	0.372972978133344	0.261	0.129	1.31977660277675e-10	3-Activated	RHOB
TSPYL2	6.04527514766485e-15	0.346181721806037	0.668	0.496	2.02746437902384e-10	3-Activated	TSPYL2
ODC1	8.58902020313259e-15	0.297662705370707	0.849	0.779	2.88058559572661e-10	3-Activated	ODC1
ARHGAP15	1.01867089855871e-14	0.275027625474519	0.637	0.49	3.41641845958619e-10	3-Activated	ARHGAP15
RASGEF1B	3.93052341346036e-14	0.29509962347712	0.33	0.188	1.31821894240634e-09	3-Activated	RASGEF1B
KLF21	1.24469952362451e-13	0.266332891757399	0.839	0.732	4.17447326233189e-09	3-Activated	KLF2
NR4A1	2.74556694861519e-13	0.565979160451453	0.517	0.379	9.20808243226563e-09	3-Activated	NR4A1
UBE2S	5.34504627461198e-13	0.300856934941487	0.509	0.368	1.79262161957937e-08	3-Activated	UBE2S
SBDS	4.22572613860349e-12	0.254849013637409	0.672	0.55	1.41722403236484e-07	3-Activated	SBDS
IRS2	4.28239737768212e-12	0.276584992019985	0.271	0.154	1.43623043252703e-07	3-Activated	IRS2
NR3C1	9.89720155370084e-12	0.274224372125347	0.697	0.601	3.31932345708019e-07	3-Activated	NR3C1
NSG1	1.08666702335035e-11	0.26156553586659	0.24	0.13	3.6444638629124e-07	3-Activated	NSG1
ZFP36L1	1.70338047571078e-11	0.340916000323752	0.697	0.608	5.71279743943881e-07	3-Activated	ZFP36L1
HERPUD2	4.61380966717414e-11	0.255310049288667	0.597	0.485	1.54737948617686e-06	3-Activated	HERPUD2
PAG1	4.84565688785122e-11	0.274234546518603	0.354	0.231	1.62513640704754e-06	3-Activated	PAG1
PNP	5.76658408897749e-11	0.314461158003003	0.686	0.595	1.93399697176127e-06	3-Activated	PNP
CHMP1B1	6.24341403203565e-11	0.316345709820297	0.654	0.547	2.09391619806411e-06	3-Activated	CHMP1B
PRNP	7.26352674928334e-11	0.268306055035388	0.542	0.425	2.43604160117465e-06	3-Activated	PRNP
FOXP11	8.87810725360434e-11	0.251349685768847	0.525	0.396	2.97753961071382e-06	3-Activated	FOXP1
RILPL2	1.03827370849528e-10	0.256062080782108	0.523	0.402	3.48216236355148e-06	3-Activated	RILPL2
XCL1	1.5670646930542e-10	0.740585188061439	0.159	0.071	5.25562156756519e-06	3-Activated	XCL1
ID31	5.00370139119233e-10	0.256715770273575	0.185	0.092	1.67814137257808e-05	3-Activated	ID3
VIM	8.05834174942238e-10	0.333162138251325	0.98	0.969	2.70260665592128e-05	3-Activated	VIM
H2AFZ	1.54367856985195e-09	0.268711359443872	0.809	0.784	5.17718918756946e-05	3-Activated	H2AFZ
JUND	1.69089639148893e-09	0.255870112950397	0.745	0.677	5.67092831777558e-05	3-Activated	JUND
EGR1	2.26609876427913e-08	0.384762645755574	0.191	0.106	0.000760004203563934	3-Activated	EGR1
GPR183	4.2872219216175e-08	0.26018832411117	0.656	0.538	0.00143784848807208	3-Activated	GPR183
S100A11	6.01008186343515e-08	0.297333296809811	0.684	0.595	0.00201566125535888	3-Activated	S100A11
ATP1B31	7.78921840233466e-08	0.251208526830301	0.646	0.571	0.002612348067775	3-Activated	ATP1B3
CD83	1.07208294024199e-07	0.25505257544824	0.352	0.251	0.00359555176498359	3-Activated	CD83
TIPARP	2.53779956565814e-07	0.257809307433446	0.546	0.456	0.00851127218330428	3-Activated	TIPARP
TNFSF9	6.99024367530748e-06	0.265065270830076	0.253	0.171	0.234438792382462	3-Activated	TNFSF9
CCR4	1.40031304126199e-86	0.805719892754798	0.451	0.037	4.69636987778445e-82	4-Helper-like UM2	CCR4
CCR8	9.93236260280023e-50	0.340543771375457	0.148	0.005	3.33111576972714e-45	4-Helper-like UM2	CCR8
SH3TC1	3.12156483481387e-49	0.476042279503484	0.246	0.018	1.04691041429988e-44	4-Helper-like UM2	SH3TC1
SESN3	5.9055646353552e-48	0.944241973371979	0.607	0.141	1.98060826740543e-43	4-Helper-like UM2	SESN3
CD4	8.43525440706517e-44	0.320008874308893	0.156	0.007	2.82901562304152e-39	4-Helper-like UM2	CD4
ICOS	4.29618981665247e-38	0.750942182009335	0.557	0.136	1.44085614070891e-33	4-Helper-like UM2	ICOS
KRT1	5.61220299489226e-34	0.714869032091709	0.377	0.07	1.88222064042697e-29	4-Helper-like UM2	KRT1
ARID5B	4.24433077927551e-25	0.730287085703931	0.697	0.295	1.42346365675342e-20	4-Helper-like UM2	ARID5B
LTB	8.41120512901862e-25	0.714321269584899	0.967	0.634	2.82094997617026e-20	4-Helper-like UM2	LTB
CD28	3.449903122641e-24	0.583741800641651	0.582	0.201	1.15702850927134e-19	4-Helper-like UM2	CD28
NR3C11	7.26769312889251e-19	0.74547224392276	0.885	0.606	2.43743892156797e-14	4-Helper-like UM2	NR3C1
CD40LG	5.42199866301164e-18	0.300985305709764	0.115	0.012	1.81842991160084e-13	4-Helper-like UM2	CD40LG
RCAN3	7.15195062745087e-17	0.502618593540825	0.533	0.224	2.39862120143447e-12	4-Helper-like UM2	RCAN3
ANXA11	8.59903202228333e-16	0.512089772207334	0.992	0.908	2.88394335963338e-11	4-Helper-like UM2	ANXA1
GK	5.66585488867578e-15	0.292426309528646	0.156	0.027	1.90021441256408e-10	4-Helper-like UM2	GK
FXYD5	4.89713887806827e-13	0.307942876569699	0.992	0.953	1.64240243692653e-08	4-Helper-like UM2	FXYD5
FTH12	5.95985845044232e-13	0.332121239228466	1	1	1.99881732710934e-08	4-Helper-like UM2	FTH1
IL7R1	9.52416060933874e-13	0.402251841696309	0.943	0.747	3.19421298516003e-08	4-Helper-like UM2	IL7R
GATA3	1.25044499611049e-12	0.622967393019338	0.713	0.449	4.19374242795538e-08	4-Helper-like UM2	GATA3
ITK	1.52533891905812e-12	0.494466931969781	0.467	0.207	5.11568166673711e-08	4-Helper-like UM2	ITK
CAPG	1.81200407698647e-12	0.294490212554119	0.238	0.067	6.07709927339722e-08	4-Helper-like UM2	CAPG
RHBDD2	5.73261153719978e-12	0.499239196532045	0.672	0.428	1.92260325734606e-07	4-Helper-like UM2	RHBDD2
S1PR1	6.79265594250469e-12	0.460435273071351	0.721	0.462	2.27812094999722e-07	4-Helper-like UM2	S1PR1
JUNB2	4.35079750907536e-11	0.433695209522914	0.984	0.945	1.45917046859369e-06	4-Helper-like UM2	JUNB
CAMK4	6.79339710458176e-11	0.450675582385399	0.656	0.395	2.27836952093463e-06	4-Helper-like UM2	CAMK4
NDUFV21	1.45045981748305e-10	0.396076324401478	0.836	0.599	4.86455213587466e-06	4-Helper-like UM2	NDUFV2
TRAT1	1.57835451216122e-10	0.447393956460336	0.475	0.233	5.29348536288629e-06	4-Helper-like UM2	TRAT1
ITGB11	8.25013871715877e-10	0.430172847527994	0.705	0.429	2.76693152296071e-05	4-Helper-like UM2	ITGB1
ALOX5AP1	1.49079015147784e-09	0.282671866858174	0.5	0.232	4.99981201002638e-05	4-Helper-like UM2	ALOX5AP
PELI11	2.43200273461482e-09	0.280280900495122	0.393	0.172	8.15645077135117e-05	4-Helper-like UM2	PELI1
DUSP41	2.5551362431201e-09	0.447451851799455	0.484	0.255	8.56941593217621e-05	4-Helper-like UM2	DUSP4
INPP4B	2.78476807274054e-09	0.33084002422806	0.377	0.17	9.33955516235724e-05	4-Helper-like UM2	INPP4B
RNASET2	2.84512087467065e-09	0.381779707213262	0.639	0.391	9.54196638947044e-05	4-Helper-like UM2	RNASET2
TRAF1	4.29767977359267e-09	0.331501664676217	0.377	0.171	0.000144135584246751	4-Helper-like UM2	TRAF1
RILPL21	1.05971669572295e-08	0.573934738388603	0.631	0.414	0.000355407785411562	4-Helper-like UM2	RILPL2
GIMAP7	1.39891201611585e-08	0.443187305817984	0.574	0.352	0.000469167111964932	4-Helper-like UM2	GIMAP7
GSTK1	2.6719740088836e-08	0.34351914970912	0.828	0.666	0.000896126643099381	4-Helper-like UM2	GSTK1
AP3M2	2.67247946678316e-08	0.357081662947693	0.402	0.197	0.000896296163569738	4-Helper-like UM2	AP3M2
CCR72	2.67954061167329e-08	0.381379673307898	0.787	0.52	0.000898664330342987	4-Helper-like UM2	CCR7
PGAP1	3.58450884251585e-08	0.290905529698439	0.262	0.105	0.00120217257560296	4-Helper-like UM2	PGAP1
CDKN1B	4.79053744862399e-08	0.411785499747813	0.656	0.456	0.00160665044951951	4-Helper-like UM2	CDKN1B
IL10RA	4.86906931732666e-08	0.393803045144502	0.631	0.409	0.00163298846764501	4-Helper-like UM2	IL10RA
FOXP12	8.08703040577904e-08	0.413750451978987	0.631	0.409	0.00271222825749017	4-Helper-like UM2	FOXP1
SAT1	9.22797139244848e-08	0.624843952000018	0.861	0.755	0.00309487704559937	4-Helper-like UM2	SAT1
LDHB1	1.40107161740119e-07	0.328471493163853	0.959	0.809	0.0046989139904401	4-Helper-like UM2	LDHB
SMC4	2.46739407177467e-07	0.301915653332384	0.238	0.095	0.00827514623791789	4-Helper-like UM2	SMC4
FAM129A	2.68219740252339e-07	0.275854672583658	0.475	0.252	0.00899555364858296	4-Helper-like UM2	FAM129A
YWHAB	2.9140289491282e-07	0.391007082664966	0.844	0.739	0.00977307028958615	4-Helper-like UM2	YWHAB
SRSF8	3.68393149564932e-07	0.387203563576081	0.385	0.201	0.0123551694501087	4-Helper-like UM2	SRSF8
DGKA	3.95449002176489e-07	0.283338895637172	0.385	0.196	0.0132625686349951	4-Helper-like UM2	DGKA
ICAM2	1.71235039928968e-06	0.320132276599779	0.328	0.166	0.0574288076913773	4-Helper-like UM2	ICAM2
GPR1831	2.36613622538673e-06	0.280261728871412	0.779	0.549	0.0793554767270202	4-Helper-like UM2	GPR183
HNRNPLL	2.6972448228052e-06	0.259461109854069	0.254	0.115	0.0904601968672407	4-Helper-like UM2	HNRNPLL
TNFAIP8	2.78820078826027e-06	0.26888517906223	0.328	0.17	0.0935106780366729	4-Helper-like UM2	TNFAIP8
LMNA1	3.28877438391044e-06	0.295179396893239	0.951	0.84	0.110298915287588	4-Helper-like UM2	LMNA
CMTM8	4.05210146027539e-06	0.258661767567763	0.172	0.066	0.135899378774716	4-Helper-like UM2	CMTM8
MAL1	4.69174210102804e-06	0.256584222208407	0.32	0.161	0.157351646584278	4-Helper-like UM2	MAL
UCP2	4.80466150708486e-06	0.376288938742936	0.721	0.546	0.161138737624612	4-Helper-like UM2	UCP2
RHOH1	5.29734533393586e-06	0.269975682382565	0.844	0.676	0.177662367809541	4-Helper-like UM2	RHOH
PASK1	7.42164538993887e-06	0.444141387807386	0.459	0.287	0.24890714308777	4-Helper-like UM2	PASK
FXYD71	8.04096629252124e-06	0.306209252953738	0.238	0.109	0.269677927518577	4-Helper-like UM2	FXYD7
CD21	1.31585709102083e-05	0.353027059810763	0.713	0.518	0.441312151186567	4-Helper-like UM2	CD2
LPAR2	1.35975412817408e-05	0.258717366024992	0.254	0.123	0.456034339507025	4-Helper-like UM2	LPAR2
KLF22	3.9954338551156e-05	0.263164133214328	0.852	0.746	1	4-Helper-like UM2	KLF2
ELF1	5.16201755312374e-05	0.257847036642215	0.861	0.742	1	4-Helper-like UM2	ELF1
PRDX1	6.37601624931086e-05	0.314468643508821	0.689	0.562	1	4-Helper-like UM2	PRDX1
FYB1	8.18869356661555e-05	0.25626239318784	0.779	0.652	1	4-Helper-like UM2	FYB1
DNAJB9	8.9518282028307e-05	0.258319467763018	0.598	0.42	1	4-Helper-like UM2	DNAJB9
ANKRD12	9.88152276884382e-05	0.257227553871537	0.836	0.75	1	4-Helper-like UM2	ANKRD12
SFXN1	0.000176538293368609	0.264763110514984	0.344	0.209	1	4-Helper-like UM2	SFXN1
SOD2	0.000241349835858308	0.280118916490721	0.385	0.247	1	4-Helper-like UM2	SOD2
SAMHD1	0.000552236029444713	0.257331538567822	0.352	0.213	1	4-Helper-like UM2	SAMHD1
RNF19A	0.0008973410753577	0.334187829667874	0.516	0.386	1	4-Helper-like UM2	RNF19A
KIF5B	0.0094007796617166	0.280303735878007	0.467	0.376	1	4-Helper-like UM2	KIF5B
RPS4Y1	0	2.27395070300758	0.987	0.028	0	5-Helper-like UM3	RPS4Y1
DDX3Y	4.50864772501923e-267	0.835373223582621	0.549	0.009	1.51211027401695e-262	5-Helper-like UM3	DDX3Y
MTRNR2L8	5.34886312380358e-232	2.88776602207603	0.994	0.282	1.79390171446124e-227	5-Helper-like UM3	MTRNR2L8
TNFRSF4	3.6141270732514e-220	0.999722733520131	0.575	0.029	1.21210593782706e-215	5-Helper-like UM3	TNFRSF4
KRT11	3.76957916250455e-202	0.873265322326889	0.533	0.025	1.26424145952077e-197	5-Helper-like UM3	KRT1
TNFRSF18	2.24119950145207e-168	0.56748454803985	0.381	0.01	7.51653488796994e-164	5-Helper-like UM3	TNFRSF18
SMDT1	4.63659626450762e-150	0.978509017683704	0.825	0.185	1.55502165519056e-145	5-Helper-like UM3	SMDT1
USP46	2.69949765796359e-141	0.702679438315684	0.514	0.049	9.05357524527828e-137	5-Helper-like UM3	USP46
EIF1AY	2.53804951911674e-125	0.404245803508156	0.273	0.005	8.51211047721373e-121	5-Helper-like UM3	EIF1AY
TPT1	4.52711048072251e-121	0.472078970254835	1	1	1.51830231302472e-116	5-Helper-like UM3	TPT1
LTB1	5.26865883870718e-99	0.992669251508688	0.984	0.605	1.76700280132561e-94	5-Helper-like UM3	LTB
TMPRSS11E	1.02688980394816e-96	0.307692964259656	0.181	0	3.44398302448135e-92	5-Helper-like UM3	TMPRSS11E
RPS81	9.27665138426821e-84	0.371105773621712	1	0.999	3.11120334125587e-79	5-Helper-like UM3	RPS8
RPS251	1.15311601468741e-77	0.368405284633394	1	0.999	3.86732049005865e-73	5-Helper-like UM3	RPS25
SUSD4	2.14449224646131e-77	0.299773264210773	0.213	0.01	7.19219809618194e-73	5-Helper-like UM3	SUSD4
RPL39	9.01538255645721e-72	0.305895679849955	1	0.998	3.02357900178462e-67	5-Helper-like UM3	RPL39
RPL10	1.78304597703146e-71	0.270769426426003	1	1	5.97997959776811e-67	5-Helper-like UM3	RPL10
GPR1832	7.1721105838108e-71	0.788782799143571	0.946	0.508	2.40538244759846e-66	5-Helper-like UM3	GPR183
UTY	2.20254856171728e-70	0.266829056347572	0.152	0.003	7.38690736628741e-66	5-Helper-like UM3	UTY
RPS121	4.46524093957681e-70	0.31390460131784	1	1	1.49755250631527e-65	5-Helper-like UM3	RPS12
RPLP0	1.08108922543621e-69	0.379743545865175	1	0.999	3.62575704426796e-65	5-Helper-like UM3	RPLP0
RPL36	4.79972714286906e-69	0.350254979829328	1	0.998	1.60973248917542e-64	5-Helper-like UM3	RPL36
ANXA12	2.47588302392669e-67	0.683600827967329	0.997	0.901	8.30361648564534e-63	5-Helper-like UM3	ANXA1
RPS15	6.50270453137164e-66	0.285647046617203	1	1	2.18087704573142e-61	5-Helper-like UM3	RPS15
RPL131	6.28318612774155e-65	0.277995404059899	1	1	2.10725496352196e-60	5-Helper-like UM3	RPL13
FXYD51	1.35119879404602e-64	0.495330225523424	1	0.949	4.53165051547154e-60	5-Helper-like UM3	FXYD5
RPL34	5.49987159021386e-64	0.274596430891257	1	1	1.84454693392592e-59	5-Helper-like UM3	RPL34
ARMH1	1.15262861415465e-62	0.533892504587564	0.521	0.13	3.86568584615186e-58	5-Helper-like UM3	ARMH1
RPLP1	5.38268582719122e-60	0.267809713579239	1	1	1.80524517272339e-55	5-Helper-like UM3	RPLP1
RPL321	8.53276016593701e-60	0.270451181878831	1	1	2.86171710445195e-55	5-Helper-like UM3	RPL32
RPL91	9.29384784190818e-60	0.334045589823311	1	0.999	3.11697068921916e-55	5-Helper-like UM3	RPL9
RPL29	1.38997301774613e-59	0.299270402506194	1	0.999	4.66169150691698e-55	5-Helper-like UM3	RPL29
MAL2	3.183818830927e-57	0.516218299113573	0.489	0.126	1.0677891595163e-52	5-Helper-like UM3	MAL
RPL11	1.66176569652115e-56	0.25837913295999	1	1	5.57322979299264e-52	5-Helper-like UM3	RPL11
RPS19	5.1389555174196e-55	0.291541566234675	1	1	1.72350290143218e-50	5-Helper-like UM3	RPS19
CCR41	2.85260956279225e-54	0.32715054340741	0.248	0.031	9.56708195169266e-50	5-Helper-like UM3	CCR4
RPL181	2.21037554453467e-53	0.27388624322049	1	0.998	7.41315750126039e-49	5-Helper-like UM3	RPL18
RPS18	2.5420398785962e-51	0.282419548621845	1	0.999	8.52549334483595e-47	5-Helper-like UM3	RPS18
RPS131	2.77649986733158e-51	0.278455642949313	1	0.999	9.31182525505665e-47	5-Helper-like UM3	RPS13
FOS1	1.11691685163642e-49	0.595792016438421	1	0.843	3.74591573701824e-45	5-Helper-like UM3	FOS
TIMP1	2.12463509706978e-49	0.508056964195952	0.66	0.238	7.12560118855264e-45	5-Helper-like UM3	TIMP1
RPL14	3.87273668727652e-49	0.272874266080069	1	0.999	1.2988384301788e-44	5-Helper-like UM3	RPL14
C1orf162	5.17520238959808e-49	0.431998256669909	0.41	0.1	1.7356593774234e-44	5-Helper-like UM3	C1orf162
ICAM21	1.87129142102007e-48	0.494192108266806	0.47	0.135	6.27593716781711e-44	5-Helper-like UM3	ICAM2
WDR741	2.18399204112323e-48	0.562182823343351	0.762	0.342	7.32467250751908e-44	5-Helper-like UM3	WDR74
RPL38	2.18846343636866e-48	0.341506923737231	0.997	0.988	7.3396686728932e-44	5-Helper-like UM3	RPL38
RPL35	7.64406885166844e-47	0.305018057090045	1	0.994	2.56366781147256e-42	5-Helper-like UM3	RPL35
SESN31	1.07859005975615e-46	0.429864956766021	0.457	0.123	3.61737534241018e-42	5-Helper-like UM3	SESN3
ARHGAP151	1.56788949936792e-46	0.573002381011007	0.867	0.471	5.25838780298013e-42	5-Helper-like UM3	ARHGAP15
EDA	1.69375996832395e-46	0.268373481064109	0.165	0.014	5.68053218176486e-42	5-Helper-like UM3	EDA
ITGB12	1.57935421183109e-45	0.520699451941655	0.813	0.392	5.29683815563912e-41	5-Helper-like UM3	ITGB1
BAG3	4.19744766583239e-45	0.436366233962732	0.425	0.114	1.40773999816687e-40	5-Helper-like UM3	BAG3
RPL36A	6.612387283145e-45	0.386260496099005	1	0.972	2.21766244702117e-40	5-Helper-like UM3	RPL36A
RPL8	8.2284110756164e-43	0.261731741718379	1	0.999	2.75964450654023e-38	5-Helper-like UM3	RPL8
PTTG1IP	2.84112979906666e-42	0.378893388775678	0.394	0.103	9.52858112010976e-38	5-Helper-like UM3	PTTG1IP
RPL10A1	4.13024756138517e-42	0.287384054172838	1	0.995	1.38520242713736e-37	5-Helper-like UM3	RPL10A
NET1	1.51078290424624e-41	0.329048501800814	0.276	0.054	5.06686370426104e-37	5-Helper-like UM3	NET1
AP3M21	8.35328613021669e-40	0.429891398319371	0.508	0.167	2.80152510235207e-35	5-Helper-like UM3	AP3M2
SELL1	9.16174086824803e-40	0.505429272204088	0.714	0.328	3.07266465239302e-35	5-Helper-like UM3	SELL
NOSIP1	3.35805052203711e-38	0.465154539853474	0.917	0.615	1.12622298408081e-33	5-Helper-like UM3	NOSIP
RPSA	1.70660290488907e-36	0.282269780104385	0.997	0.998	5.72360482241696e-32	5-Helper-like UM3	RPSA
PTGER2	4.96232181577432e-36	0.350032022779025	0.327	0.083	1.66426349057439e-31	5-Helper-like UM3	PTGER2
ANKRD28	1.83187005880116e-35	0.351211661439349	0.292	0.068	6.14372580320732e-31	5-Helper-like UM3	ANKRD28
CAPG1	2.63915887299629e-35	0.285413608568599	0.251	0.051	8.85121102825495e-31	5-Helper-like UM3	CAPG
GATA31	6.92726879067623e-34	0.510822778585371	0.771	0.42	2.32326740701699e-29	5-Helper-like UM3	GATA3
IL7R2	6.86956122418171e-33	0.42909875102787	0.978	0.727	2.30391344336606e-28	5-Helper-like UM3	IL7R
RPL27	8.58594655282684e-33	0.264253315794118	1	0.992	2.87955475488707e-28	5-Helper-like UM3	RPL27
HERPUD1	8.81378093374746e-33	0.486079140949895	0.937	0.716	2.95596584956022e-28	5-Helper-like UM3	HERPUD1
RPL13A	4.04821281825654e-32	0.257913658118102	1	0.995	1.35768961498688e-27	5-Helper-like UM3	RPL13A
FAM122C	6.31404909583386e-32	0.322198568897817	0.289	0.074	2.11760578576076e-27	5-Helper-like UM3	FAM122C
S100A111	6.59558455290181e-32	0.510534709037833	0.857	0.579	2.21202714735221e-27	5-Helper-like UM3	S100A11
CXorf57	1.12703696440467e-29	0.250057542740746	0.178	0.031	3.77985657122037e-25	5-Helper-like UM3	CXorf57
DNAJB91	1.12941651411503e-29	0.449749712959499	0.721	0.39	3.78783710503899e-25	5-Helper-like UM3	DNAJB9
TESPA1	1.81638979978858e-29	0.336439527073935	0.384	0.128	6.09180811053094e-25	5-Helper-like UM3	TESPA1
PPIB	2.2987811253749e-28	0.349697746569186	0.968	0.819	7.70965213828232e-24	5-Helper-like UM3	PPIB
RPL27A	2.7631019562963e-27	0.296079816766061	0.997	0.964	9.26689134102653e-23	5-Helper-like UM3	RPL27A
TRMT6	4.16369965616116e-26	0.321942631301573	0.359	0.124	1.39642159068333e-21	5-Helper-like UM3	TRMT6
S1PR11	1.47080581730587e-25	0.516899862442461	0.708	0.443	4.93278855008042e-21	5-Helper-like UM3	S1PR1
TNFSF8	1.91852272608986e-25	0.278050711455379	0.238	0.062	6.43434151876018e-21	5-Helper-like UM3	TNFSF8
FAM107B	2.38590970083966e-25	0.395183980462528	0.619	0.31	8.00186395467605e-21	5-Helper-like UM3	FAM107B
MX1	2.97875370658216e-25	0.300004703851861	0.27	0.078	9.99014418113524e-21	5-Helper-like UM3	MX1
NSMCE1	3.83802142579072e-25	0.373108503637263	0.495	0.215	1.28719562578169e-20	5-Helper-like UM3	NSMCE1
LMNA2	1.8155089712366e-24	0.322521681825545	0.997	0.825	6.08885398773331e-20	5-Helper-like UM3	LMNA
HSPA5	1.95245804052673e-24	0.320401253855477	0.987	0.967	6.54815377631855e-20	5-Helper-like UM3	HSPA5
GIMAP71	4.56077204506233e-24	0.405429780444633	0.625	0.327	1.52959172847301e-19	5-Helper-like UM3	GIMAP7
RPS11	1.92161883748921e-23	0.282395138920254	0.99	0.94	6.4447252571713e-19	5-Helper-like UM3	RPS11
TRAM1	1.106190837137e-22	0.370902740643464	0.724	0.408	3.70994282959006e-18	5-Helper-like UM3	TRAM1
PGAP11	3.06597361770782e-22	0.323312732313713	0.279	0.091	1.02826623190685e-17	5-Helper-like UM3	PGAP1
HINT1	7.80846745236651e-22	0.278662096754796	0.978	0.906	2.61880381417468e-17	5-Helper-like UM3	HINT1
PLAUR	8.04508403025102e-22	0.293355696707692	0.381	0.148	2.69816028206559e-17	5-Helper-like UM3	PLAUR
IL10RA1	6.06976491294446e-21	0.380529750478587	0.683	0.385	2.03567775650331e-16	5-Helper-like UM3	IL10RA
ERN1	1.38138892742706e-20	0.31681420891157	0.416	0.173	4.63290218480487e-16	5-Helper-like UM3	ERN1
TNFAIP81	2.07085070595379e-20	0.285529379253741	0.378	0.15	6.94521909762783e-16	5-Helper-like UM3	TNFAIP8
NDUFV22	3.88291334745196e-20	0.395776437652261	0.832	0.581	1.30225147846844e-15	5-Helper-like UM3	NDUFV2
SRSF81	7.96586814379598e-20	0.27794863766059	0.422	0.181	2.67159285806629e-15	5-Helper-like UM3	SRSF8
LDHB2	1.15507230430603e-19	0.30598486434033	0.921	0.802	3.87388149418156e-15	5-Helper-like UM3	LDHB
RHBDD21	8.60795293712487e-19	0.327737686412284	0.692	0.405	2.88693525605294e-14	5-Helper-like UM3	RHBDD2
VIM1	5.04078273577488e-18	0.326259950592044	0.997	0.967	1.69057771392418e-13	5-Helper-like UM3	VIM
RCAN31	1.03871858425143e-17	0.250187356782954	0.457	0.209	3.48365438786245e-13	5-Helper-like UM3	RCAN3
SATB11	2.5598377931759e-17	0.282298780949819	0.571	0.294	8.58518399075333e-13	5-Helper-like UM3	SATB1
P4HB	1.3807573330756e-16	0.298392178246652	0.781	0.542	4.63078394366896e-12	5-Helper-like UM3	P4HB
IL4R	2.44040628156984e-16	0.305660473967052	0.394	0.185	8.18463458712894e-12	5-Helper-like UM3	IL4R
CDK2AP2	1.68431495906715e-15	0.372446951734466	0.629	0.389	5.64885550971941e-11	5-Helper-like UM3	CDK2AP2
PLP2	2.61449501360566e-15	0.297922881429535	0.708	0.456	8.76849337663066e-11	5-Helper-like UM3	PLP2
SDF2L1	1.02984439294389e-14	0.276701228466735	0.492	0.262	3.45389212505521e-10	5-Helper-like UM3	SDF2L1
SEC61G	3.78712708793321e-14	0.313014495602253	0.781	0.55	1.27012668275104e-09	5-Helper-like UM3	SEC61G
HSP90B1	4.01201307379599e-14	0.296308697280719	0.873	0.701	1.3455489446897e-09	5-Helper-like UM3	HSP90B1
EIF3E1	9.38104040491507e-14	0.252194354310298	0.905	0.752	3.14621333100042e-09	5-Helper-like UM3	EIF3E
SEC11C	2.70582992811473e-13	0.252866259228447	0.543	0.3	9.07481241291118e-09	5-Helper-like UM3	SEC11C
MYDGF	1.16397945278677e-12	0.250562203977106	0.635	0.394	3.90375428875627e-08	5-Helper-like UM3	MYDGF
OSTC	2.99434684921718e-10	0.250797809543265	0.552	0.341	1.00424404629046e-05	5-Helper-like UM3	OSTC
AL138963.31	0.000674349503599635	0.43259535104063	0.394	0.289	1	5-Helper-like UM3	AL138963.3
CCR9	4.49289442206531e-287	1.03965133471761	0.563	0.002	1.50682693127226e-282	6-CCR9+ effectors	CCR9
LDLRAD4	5.35230098719707e-53	1.22248535703393	0.606	0.085	1.79505470508615e-48	6-CCR9+ effectors	LDLRAD4
IGFBP3	3.25039782311523e-46	0.787840069737594	0.38	0.034	1.09011842191638e-41	6-CCR9+ effectors	IGFBP3
ITGA1	1.11141653835788e-44	0.325562411357854	0.155	0.004	3.72746878634467e-40	6-CCR9+ effectors	ITGA1
ITM2C	4.74544971460735e-40	0.96879544239315	0.69	0.144	1.59152892528501e-35	6-CCR9+ effectors	ITM2C
LZTFL1	1.13111606273752e-26	0.508584937495101	0.268	0.03	3.7935370512091e-22	6-CCR9+ effectors	LZTFL1
KLRB1	2.34003936427913e-26	0.864326499088939	0.521	0.108	7.84802401991934e-22	6-CCR9+ effectors	KLRB1
TMIGD2	1.78331452562214e-25	0.421292795969221	0.254	0.028	5.98088025603152e-21	6-CCR9+ effectors	TMIGD2
HOXB2	1.6027039046687e-20	0.569121155441888	0.408	0.087	5.37514835547788e-16	6-CCR9+ effectors	HOXB2
S100A101	6.60738688831743e-20	0.794216115069846	0.986	0.893	2.2159854146039e-15	6-CCR9+ effectors	S100A10
NEDD9	8.78598695171078e-16	0.63675543728659	0.408	0.111	2.94664430386476e-11	6-CCR9+ effectors	NEDD9
CCL51	6.01218961574793e-15	0.60646303292499	0.972	0.735	2.01636815332954e-10	6-CCR9+ effectors	CCL5
MT-CYB1	5.87681219964835e-13	0.392266090922583	1	1	1.97096527551806e-08	6-CCR9+ effectors	MT-CYB
VIM2	1.45712709614969e-12	0.505517649815306	1	0.97	4.88691285506682e-08	6-CCR9+ effectors	VIM
FLT3LG1	1.08920913013629e-11	0.604158824998662	0.817	0.552	3.6529895806511e-07	6-CCR9+ effectors	FLT3LG
MT-ND21	1.39704403920939e-11	0.482909012275213	1	0.97	4.68540629870045e-07	6-CCR9+ effectors	MT-ND2
NT5E	2.80161144631924e-11	0.384335345688665	0.239	0.055	9.39604446866548e-07	6-CCR9+ effectors	NT5E
MT-ND11	2.86195487220318e-11	0.348426649459217	1	0.995	9.59842425039503e-07	6-CCR9+ effectors	MT-ND1
2001-06-01	4.12314690594602e-10	0.568269376149481	0.93	0.676	1.38282100931617e-05	6-CCR9+ effectors	JUN
ABCB1	8.2184659709028e-10	0.404814857645183	0.239	0.061	2.75630911732138e-05	6-CCR9+ effectors	ABCB1
DSE	1.38208947485886e-09	0.270698145454271	0.155	0.028	4.63525168078164e-05	6-CCR9+ effectors	DSE
AHNAK1	1.62554585783019e-09	0.595529336756517	0.859	0.607	5.45175569799089e-05	6-CCR9+ effectors	AHNAK
PTPN4	2.06486832683493e-09	0.442222096375027	0.465	0.185	6.92515539453898e-05	6-CCR9+ effectors	PTPN4
IL7R3	2.56316593444507e-09	0.479997427917712	1	0.75	8.59634591094187e-05	6-CCR9+ effectors	IL7R
MT-ND4L1	1.42681430445485e-08	0.29198223174323	1	0.999	0.000478524981428068	6-CCR9+ effectors	MT-ND4L
LMNA3	1.845856545245e-08	0.389460068760731	1	0.841	0.000619063368144267	6-CCR9+ effectors	LMNA
ATF3	2.44437363150523e-08	0.34323184724509	0.352	0.124	0.000819794028534224	6-CCR9+ effectors	ATF3
MLF11	2.86437341226356e-08	0.487291908366929	0.507	0.235	0.000960653555004952	6-CCR9+ effectors	MLF1
PDE4D	3.35986086807853e-08	0.555821633401363	0.69	0.429	0.00112683013793618	6-CCR9+ effectors	PDE4D
S100A112	5.67861105200469e-08	0.45932849634245	0.887	0.604	0.00190449257462133	6-CCR9+ effectors	S100A11
LCP2	1.08127292765484e-07	0.40938299998328	0.423	0.184	0.0036263731447688	6-CCR9+ effectors	LCP2
MT-ND41	1.62902047707953e-07	0.257752927489078	1	0.995	0.00546340887602933	6-CCR9+ effectors	MT-ND4
ANXA2	2.15512144886275e-07	0.561722861940303	0.592	0.332	0.00722784631519588	6-CCR9+ effectors	ANXA2
MYBL1	2.30770254901683e-07	0.296704891944662	0.183	0.048	0.00773957280889263	6-CCR9+ effectors	MYBL1
ANKRD281	2.87295293159511e-07	0.383615727068598	0.268	0.089	0.00963530954198367	6-CCR9+ effectors	ANKRD28
MYADM	3.32646868805472e-07	0.301862642961122	0.986	0.962	0.0111563106859979	6-CCR9+ effectors	MYADM
AUTS2	8.21805802708289e-07	0.284181039091555	0.268	0.092	0.0275617230112306	6-CCR9+ effectors	AUTS2
GABARAPL1	1.40054212180128e-06	0.351968886121854	0.859	0.664	0.0469713816809714	6-CCR9+ effectors	GABARAPL1
ITM2B	2.63354507752443e-06	0.291709050514246	0.93	0.893	0.0883238348100144	6-CCR9+ effectors	ITM2B
MT-CO3	2.8627808366278e-06	0.250031488091892	1	0.999	0.0960119436988232	6-CCR9+ effectors	MT-CO3
PIK3IP11	3.14547284250483e-06	0.361972135990412	0.662	0.402	0.105492868191927	6-CCR9+ effectors	PIK3IP1
ANXA13	4.04821975920445e-06	0.301565081336888	1	0.91	0.135769194284199	6-CCR9+ effectors	ANXA1
ITGA4	4.59559904148505e-06	0.392275075523938	0.634	0.388	0.154127200653326	6-CCR9+ effectors	ITGA4
LGALS11	5.47937985679571e-06	0.388293096256314	0.606	0.355	0.183767441637214	6-CCR9+ effectors	LGALS1
BCL2	8.09833729554182e-06	0.316906914505184	0.352	0.161	0.271602036217882	6-CCR9+ effectors	BCL2
TAGLN2	1.10565077764703e-05	0.269568428869619	1	0.98	0.37081315780726	6-CCR9+ effectors	TAGLN2
TSC22D31	1.74517078370152e-05	0.258734311751344	1	0.978	0.585295377437815	6-CCR9+ effectors	TSC22D3
PIM11	2.37237365626578e-05	0.539015789086666	0.549	0.369	0.795646676838417	6-CCR9+ effectors	PIM1
C1orf174	2.98023302254872e-05	0.259303908373169	0.254	0.102	0.999510551102389	6-CCR9+ effectors	C1orf174
DOCK8	3.19950451645228e-05	0.434553924269371	0.479	0.284	1	6-CCR9+ effectors	DOCK8
NUP160	3.57217441709607e-05	0.26480119996648	0.225	0.087	1	6-CCR9+ effectors	NUP160
MYL12A1	4.00185617278818e-05	0.265166648129855	0.93	0.803	1	6-CCR9+ effectors	MYL12A
SYNE21	4.1456002347266e-05	0.44815184426392	0.662	0.479	1	6-CCR9+ effectors	SYNE2
SAMSN1	4.76886240158457e-05	0.3470514883181	0.803	0.609	1	6-CCR9+ effectors	SAMSN1
GADD45B1	5.38245927359496e-05	0.314403551014229	0.901	0.74	1	6-CCR9+ effectors	GADD45B
ODF2L	5.52048375303329e-05	0.364730330073614	0.423	0.233	1	6-CCR9+ effectors	ODF2L
PTGER21	6.0588682149041e-05	0.321025200668167	0.254	0.107	1	6-CCR9+ effectors	PTGER2
FAM102A	6.3984900503803e-05	0.333081316375347	0.38	0.195	1	6-CCR9+ effectors	FAM102A
COTL1	7.14704023508946e-05	0.342394670110592	0.69	0.528	1	6-CCR9+ effectors	COTL1
NIN	9.47907166849195e-05	0.348184449227556	0.254	0.11	1	6-CCR9+ effectors	NIN
PARP8	9.63006242883495e-05	0.315782250506604	0.549	0.335	1	6-CCR9+ effectors	PARP8
CD6	0.000101974733121555	0.365201320265233	0.62	0.459	1	6-CCR9+ effectors	CD6
CDKN2A	0.000142047392879939	0.296764184424321	0.155	0.053	1	6-CCR9+ effectors	CDKN2A
SOCS1	0.000149410883183129	0.357433253852709	0.634	0.489	1	6-CCR9+ effectors	SOCS1
OFD1	0.000156302764693287	0.279245944980364	0.437	0.254	1	6-CCR9+ effectors	OFD1
PAK1IP1	0.000157326624730296	0.296622867302902	0.211	0.088	1	6-CCR9+ effectors	PAK1IP1
MT-ND5	0.000157329848447545	0.282491196922332	1	0.986	1	6-CCR9+ effectors	MT-ND5
YIPF5	0.000165952214956038	0.312554961953198	0.549	0.361	1	6-CCR9+ effectors	YIPF5
MTRNR2L12	0.00017609107349135	0.38262457382837	1	0.999	1	6-CCR9+ effectors	MTRNR2L12
KLF61	0.000181762659230568	0.287595769876134	0.944	0.859	1	6-CCR9+ effectors	KLF6
SSBP2	0.000254007974979093	0.251976413840732	0.197	0.081	1	6-CCR9+ effectors	SSBP2
BAG5	0.000267925840329908	0.255616583389745	0.268	0.126	1	6-CCR9+ effectors	BAG5
SSBP4	0.0002720727932309	0.331482263411395	0.394	0.221	1	6-CCR9+ effectors	SSBP4
IDS	0.000318771287645775	0.300529899500915	0.93	0.824	1	6-CCR9+ effectors	IDS
RPS6KA3	0.00033998274810371	0.29648558910388	0.197	0.082	1	6-CCR9+ effectors	RPS6KA3
TMPO	0.00035151282213066	0.254934991601828	0.225	0.099	1	6-CCR9+ effectors	TMPO
NFKBIA1	0.000375746124360503	0.253853665338642	0.915	0.809	1	6-CCR9+ effectors	NFKBIA
PERP1	0.000378955567199569	0.351691681869837	0.366	0.208	1	6-CCR9+ effectors	PERP
CDC14A	0.000408732544933664	0.358040766714548	0.31	0.167	1	6-CCR9+ effectors	CDC14A
NR3C12	0.00041277298417964	0.322431974612924	0.761	0.614	1	6-CCR9+ effectors	NR3C1
GSTK11	0.000458142147664558	0.340337808452616	0.803	0.67	1	6-CCR9+ effectors	GSTK1
CYTOR1	0.000469065578782795	0.40601810088853	0.352	0.196	1	6-CCR9+ effectors	CYTOR
UGP2	0.000482964267713761	0.282888190379684	0.254	0.123	1	6-CCR9+ effectors	UGP2
CDV3	0.000504271541968336	0.286411680366	0.408	0.248	1	6-CCR9+ effectors	CDV3
TFIP11	0.000649843054997497	0.285809043750694	0.38	0.229	1	6-CCR9+ effectors	TFIP11
CD96	0.000688555440821007	0.267813543772519	0.592	0.427	1	6-CCR9+ effectors	CD96
CRIP1	0.000796380009459152	0.32204943388395	0.887	0.751	1	6-CCR9+ effectors	CRIP1
EMB	0.00107206456977262	0.281569764916434	0.577	0.409	1	6-CCR9+ effectors	EMB
MBNL1	0.00129513544690172	0.27044415949716	0.775	0.656	1	6-CCR9+ effectors	MBNL1
BCCIP	0.00138040121392397	0.266129856310916	0.423	0.271	1	6-CCR9+ effectors	BCCIP
SND1	0.00146553689036109	0.278369063888383	0.366	0.222	1	6-CCR9+ effectors	SND1
ITGAE	0.00153506289975091	0.265368332674445	0.183	0.083	1	6-CCR9+ effectors	ITGAE
DUS3L	0.00167052073858558	0.258416114998882	0.31	0.178	1	6-CCR9+ effectors	DUS3L
PLP21	0.00183077603794943	0.290715171816092	0.592	0.483	1	6-CCR9+ effectors	PLP2
NOP10	0.00214472685313928	0.269738636702156	0.465	0.32	1	6-CCR9+ effectors	NOP10
RANBP1	0.00235560470200965	0.254649780669663	0.408	0.259	1	6-CCR9+ effectors	RANBP1
AC016831.7	0.0024924527330123	0.357872129927643	0.803	0.713	1	6-CCR9+ effectors	AC016831.7
PECAM1	0.00333486838473531	0.285960896472341	0.211	0.107	1	6-CCR9+ effectors	PECAM1
PREX1	0.00399661236284899	0.263148399465749	0.254	0.138	1	6-CCR9+ effectors	PREX1
ATP1A1	0.00404937691860334	0.277883899360942	0.732	0.598	1	6-CCR9+ effectors	ATP1A1
RTCB	0.00419764862798261	0.25760696049913	0.225	0.121	1	6-CCR9+ effectors	RTCB
FYN	0.00456803337040105	0.294917356157445	0.746	0.607	1	6-CCR9+ effectors	FYN
HERC1	0.00477775225993571	0.291765744198418	0.366	0.242	1	6-CCR9+ effectors	HERC1
GPSM3	0.00567234568660599	0.263929399581572	0.704	0.653	1	6-CCR9+ effectors	GPSM3
GZMK2	0.00605505891569456	0.272779805237494	0.606	0.454	1	6-CCR9+ effectors	GZMK
NAP1L1	0.00628659743373295	0.25389769520514	0.69	0.6	1	6-CCR9+ effectors	NAP1L1
SNRPN	0.00852725856037007	0.29109771680117	0.423	0.316	1	6-CCR9+ effectors	SNRPN
GFPT2	0.00933651722543945	0.280654202637243	0.141	0.065	1	6-CCR9+ effectors	GFPT2
KIR3DL2	0	1.50561326685632	0.754	0.019	0	7-KIR3DL2+ effectors	KIR3DL2
KIR2DL1	0	1.22905490596049	0.619	0.006	0	7-KIR3DL2+ effectors	KIR2DL1
TYROBP	2.26600376743182e-275	1.53220969586472	0.759	0.07	7.59972343521283e-271	7-KIR3DL2+ effectors	TYROBP
CMC1	1.33405259049157e-248	1.58646127078457	0.812	0.135	4.47414557799062e-244	7-KIR3DL2+ effectors	CMC1
LMNB1	1.46339223260993e-217	1.30679373909586	0.698	0.096	4.90792486972718e-213	7-KIR3DL2+ effectors	LMNB1
CST7	1.31874524755355e-210	1.44676589054485	0.998	0.606	4.42280781124511e-206	7-KIR3DL2+ effectors	CST7
CD74	3.67815035737549e-207	1.68801254122645	1	0.887	1.23357806685659e-202	7-KIR3DL2+ effectors	CD74
ENC1	1.04996795265652e-192	1.22518042913779	0.668	0.098	3.52138251961943e-188	7-KIR3DL2+ effectors	ENC1
HLA-DRA	2.139822181171e-185	1.56054427967099	0.756	0.161	7.17653563121131e-181	7-KIR3DL2+ effectors	HLA-DRA
S1PR5	9.11619619086288e-173	0.984646840409472	0.586	0.072	3.05738987849159e-168	7-KIR3DL2+ effectors	S1PR5
CD160	6.3866989271103e-168	0.755855060824743	0.381	0.012	2.14197108617425e-163	7-KIR3DL2+ effectors	CD160
HLA-DRB1	7.36407320119679e-167	1.42622787362734	0.821	0.25	2.46976287021738e-162	7-KIR3DL2+ effectors	HLA-DRB1
NKG71	2.0459774148118e-166	1.24652332170494	1	0.621	6.86179905379582e-162	7-KIR3DL2+ effectors	NKG7
KLRF1	2.8414252501967e-166	0.720350061379749	0.353	0.006	9.52957200410969e-162	7-KIR3DL2+ effectors	KLRF1
HLA-B	8.73477294537124e-166	0.517760318078873	1	1	2.92946815041861e-161	7-KIR3DL2+ effectors	HLA-B
GZMM	3.55854118292804e-156	1.07555614610216	0.961	0.645	1.19346354193041e-151	7-KIR3DL2+ effectors	GZMM
ACTB	1.79162320337177e-148	0.794629628193212	1	1	6.00874589946825e-144	7-KIR3DL2+ effectors	ACTB
HLA-DPA1	6.39298198676897e-140	1.15697611997531	0.845	0.357	2.14407829872258e-135	7-KIR3DL2+ effectors	HLA-DPA1
CTSW	1.16436456182534e-139	1.00430629098949	0.957	0.686	3.90504586744984e-135	7-KIR3DL2+ effectors	CTSW
FCGR3A	1.79760651527655e-138	0.86369203874007	0.491	0.062	6.02881273093451e-134	7-KIR3DL2+ effectors	FCGR3A
TUBA4A	2.73139980138019e-138	1.01231799834889	0.996	0.908	9.16056865386889e-134	7-KIR3DL2+ effectors	TUBA4A
SH2D2A	7.50708417545625e-138	1.06414546723136	0.864	0.384	2.51772589076452e-133	7-KIR3DL2+ effectors	SH2D2A
DUSP2	2.68658303793491e-136	0.883112019679203	0.998	0.929	9.0102621926261e-132	7-KIR3DL2+ effectors	DUSP2
HLA-C	4.4951391864917e-134	0.513157187571951	1	1	1.50757978036559e-129	7-KIR3DL2+ effectors	HLA-C
HLA-A	1.81870577304029e-133	0.473463348261021	1	1	6.09957542162253e-129	7-KIR3DL2+ effectors	HLA-A
NCR1	2.07721695324947e-125	0.557243978394058	0.295	0.01	6.96657021780807e-121	7-KIR3DL2+ effectors	NCR1
HLA-DQB1	4.34459786663467e-119	1.1966192269108	0.688	0.209	1.45709123251194e-114	7-KIR3DL2+ effectors	HLA-DQB1
CEMIP2	6.09232911811473e-119	1.03513371086235	0.778	0.305	2.04324533963332e-114	7-KIR3DL2+ effectors	CEMIP2
SLA2	1.02521438461959e-117	0.977844776709645	0.677	0.201	3.43836400313719e-113	7-KIR3DL2+ effectors	SLA2
ARPC2	1.15200331045874e-116	0.79752552608909	0.978	0.842	3.86358870261652e-112	7-KIR3DL2+ effectors	ARPC2
HLA-DQA1	2.3848333706143e-114	0.858393847540335	0.438	0.062	7.99825415836624e-110	7-KIR3DL2+ effectors	HLA-DQA1
TTC38	5.77083689641143e-114	0.666135252282056	0.347	0.03	1.93542327831847e-109	7-KIR3DL2+ effectors	TTC38
CCL52	3.7046686488573e-113	0.795311564541743	0.998	0.688	1.24247177145376e-108	7-KIR3DL2+ effectors	CCL5
TNFRSF1B	2.47770332459091e-112	0.928520255365372	0.89	0.574	8.30972141001301e-108	7-KIR3DL2+ effectors	TNFRSF1B
KLRC3	2.59534833240628e-112	0.55807878609711	0.293	0.015	8.7042792372242e-108	7-KIR3DL2+ effectors	KLRC3
HLA-DPB1	6.76993915792367e-111	1.0098334834866	0.821	0.408	2.27050219478444e-106	7-KIR3DL2+ effectors	HLA-DPB1
AOAH	1.67950998068238e-109	0.813350306643405	0.532	0.113	5.63274057321258e-105	7-KIR3DL2+ effectors	AOAH
PIK3R1	1.59209198104521e-107	0.920152607170323	0.922	0.64	5.33955808602943e-103	7-KIR3DL2+ effectors	PIK3R1
LDHA1	9.25911656444041e-107	0.735362486859989	0.994	0.936	3.10532251338203e-102	7-KIR3DL2+ effectors	LDHA
ZEB2	9.60049645720458e-106	0.915277638441482	0.756	0.28	3.21981450181727e-101	7-KIR3DL2+ effectors	ZEB2
CHST12	1.7698626913401e-105	0.879952843600633	0.53	0.124	5.93576549421641e-101	7-KIR3DL2+ effectors	CHST12
APOBEC3G	7.01727622568695e-104	0.955030619547704	0.722	0.266	2.35345410057089e-99	7-KIR3DL2+ effectors	APOBEC3G
IER2	7.25554376853459e-104	0.811256265456521	0.968	0.788	2.43336426909113e-99	7-KIR3DL2+ effectors	IER2
ITM2A	5.23491097560122e-101	0.93338539103542	0.75	0.315	1.75568444299714e-96	7-KIR3DL2+ effectors	ITM2A
XCL2	1.21581742577144e-100	1.39605463504838	0.356	0.04	4.07760848255225e-96	7-KIR3DL2+ effectors	XCL2
PFN11	1.79462466204915e-98	0.640563695526914	0.991	0.972	6.01881219158045e-94	7-KIR3DL2+ effectors	PFN1
PIK3AP1	3.09230526845258e-94	0.59504067071738	0.338	0.041	1.03709734093363e-89	7-KIR3DL2+ effectors	PIK3AP1
GNG2	6.08704958447208e-92	0.80420220721599	0.912	0.665	2.04147468964025e-87	7-KIR3DL2+ effectors	GNG2
ARHGAP9	1.73864347596363e-91	0.843039469571162	0.823	0.452	5.83106248968684e-87	7-KIR3DL2+ effectors	ARHGAP9
LITAF	9.16055034058893e-90	0.668494031649726	0.978	0.916	3.07226537322672e-85	7-KIR3DL2+ effectors	LITAF
CCL3	1.70975791282189e-89	0.785629741980172	0.228	0.011	5.73418608802205e-85	7-KIR3DL2+ effectors	CCL3
ITGB21	2.45943230906813e-89	0.725221486355546	0.927	0.687	8.24844407815269e-85	7-KIR3DL2+ effectors	ITGB2
GZMA1	7.28030729313051e-89	0.776489098416981	0.862	0.401	2.44166945997011e-84	7-KIR3DL2+ effectors	GZMA
CYBA	9.12277182688606e-89	0.627561157301981	0.972	0.887	3.05959521530105e-84	7-KIR3DL2+ effectors	CYBA
PLCG2	3.11537763883815e-87	0.532829396389726	0.28	0.026	1.04483535251354e-82	7-KIR3DL2+ effectors	PLCG2
SLA	5.8463797349004e-87	0.896718234996931	0.78	0.412	1.9607588354909e-82	7-KIR3DL2+ effectors	SLA
CD8A1	1.56764783934979e-86	0.63535855677073	0.987	0.899	5.25757732361132e-82	7-KIR3DL2+ effectors	CD8A
GAPDH	4.3231684392064e-86	0.595334980378639	0.998	0.989	1.44990423114104e-81	7-KIR3DL2+ effectors	GAPDH
IFNGR1	4.33871735570823e-85	0.86394388774506	0.662	0.279	1.45511902675743e-80	7-KIR3DL2+ effectors	IFNGR1
HLA-E	6.39835725136084e-85	0.446943772470801	1	0.996	2.1458810549614e-80	7-KIR3DL2+ effectors	HLA-E
PTPRE	4.45800525051611e-84	0.784449851710172	0.567	0.171	1.49512580091809e-79	7-KIR3DL2+ effectors	PTPRE
PTPN7	2.11212834056927e-83	0.79010546734285	0.597	0.208	7.08365602860121e-79	7-KIR3DL2+ effectors	PTPN7
FASLG	2.06949236166438e-81	0.655523662446922	0.358	0.058	6.94066348254999e-77	7-KIR3DL2+ effectors	FASLG
PSMA7	9.0348754913429e-79	0.747791201557725	0.873	0.668	3.03011654228658e-74	7-KIR3DL2+ effectors	PSMA7
APMAP	1.13788199475107e-77	0.729352233253754	0.67	0.289	3.81622863399613e-73	7-KIR3DL2+ effectors	APMAP
ADGRE5	1.57489426608017e-77	0.649219440340519	0.953	0.843	5.28188038957968e-73	7-KIR3DL2+ effectors	ADGRE5
LYST	6.69365668328449e-77	0.783266064589539	0.571	0.201	2.24491857843995e-72	7-KIR3DL2+ effectors	LYST
SRGN	4.45532439938853e-75	0.426879515989489	1	0.998	1.49422669706692e-70	7-KIR3DL2+ effectors	SRGN
IL2RB	5.41638616601193e-75	0.739299714638736	0.606	0.236	1.81654759235708e-70	7-KIR3DL2+ effectors	IL2RB
TGFB11	1.13546705686291e-74	0.665364766537048	0.944	0.78	3.80812941530681e-70	7-KIR3DL2+ effectors	TGFB1
FYN1	7.43994550821631e-74	0.720000450578125	0.86	0.56	2.49520892454559e-69	7-KIR3DL2+ effectors	FYN
IL21R	1.1113647942889e-72	0.745546832344757	0.782	0.436	3.72729524708613e-68	7-KIR3DL2+ effectors	IL21R
CLIC3	1.6081823003727e-72	0.675612006661162	0.42	0.098	5.39352179898995e-68	7-KIR3DL2+ effectors	CLIC3
MAP1LC3A	1.71728938042992e-72	0.658076528661004	0.44	0.116	5.75944512408588e-68	7-KIR3DL2+ effectors	MAP1LC3A
MGAT1	2.87573318284735e-70	0.751731991499927	0.545	0.195	9.64463394863343e-66	7-KIR3DL2+ effectors	MGAT1
SIRT2	1.92522701133706e-68	0.708009087593078	0.558	0.214	6.45682635062225e-64	7-KIR3DL2+ effectors	SIRT2
LPCAT1	6.74211265493689e-68	0.559356214485025	0.353	0.073	2.26116974221274e-63	7-KIR3DL2+ effectors	LPCAT1
ABI3	1.11218902198309e-66	0.710949962116705	0.476	0.147	3.7300595419269e-62	7-KIR3DL2+ effectors	ABI3
PRKCH	2.74373551777975e-66	0.680978744049887	0.789	0.476	9.20194017952972e-62	7-KIR3DL2+ effectors	PRKCH
IFRD1	2.792512597906e-66	0.879004610964711	0.784	0.532	9.36552875085714e-62	7-KIR3DL2+ effectors	IFRD1
MAP3K8	6.39843809316795e-66	0.68739141735436	0.498	0.162	2.14590816768667e-61	7-KIR3DL2+ effectors	MAP3K8
CTPS1	5.08309617915134e-65	0.631835173417034	0.446	0.133	1.70476879656378e-60	7-KIR3DL2+ effectors	CTPS1
CCL41	2.58509507493275e-64	1.02363596012738	0.541	0.181	8.66989186230945e-60	7-KIR3DL2+ effectors	CCL4
BANP	2.15993338294617e-63	0.637043144739486	0.388	0.1	7.24398457972487e-59	7-KIR3DL2+ effectors	BANP
SYTL3	4.22414010774806e-63	0.74769458312256	0.735	0.43	1.41669210933655e-58	7-KIR3DL2+ effectors	SYTL3
TIGIT	9.60714265128902e-63	0.526050645396601	0.304	0.055	3.22204350238931e-58	7-KIR3DL2+ effectors	TIGIT
CNOT2	1.12603331608588e-62	0.794637947536538	0.683	0.38	3.77649053548881e-58	7-KIR3DL2+ effectors	CNOT2
AUTS21	2.88072588703469e-62	0.504679721200366	0.304	0.054	9.66137847993694e-58	7-KIR3DL2+ effectors	AUTS2
CALM1	5.65636716972094e-62	0.408361422039711	0.994	0.994	1.89703242138101e-57	7-KIR3DL2+ effectors	CALM1
MYL6	1.57682273316097e-61	0.442240524476908	0.987	0.965	5.28834808247527e-57	7-KIR3DL2+ effectors	MYL6
CEP78	4.35544976646516e-61	0.547624571908074	0.321	0.066	1.46073074267709e-56	7-KIR3DL2+ effectors	CEP78
PLAC8	9.94437497778007e-61	0.702608222733907	0.53	0.212	3.33514448004788e-56	7-KIR3DL2+ effectors	PLAC8
UBB	1.32118096913598e-60	0.464060643890397	0.981	0.973	4.43097673428825e-56	7-KIR3DL2+ effectors	UBB
IFITM2	1.73305946483321e-60	0.724782757704248	0.892	0.745	5.81233483315761e-56	7-KIR3DL2+ effectors	IFITM2
SRRT1	6.05674269757737e-60	0.668760640513307	0.8	0.481	2.0313103659135e-55	7-KIR3DL2+ effectors	SRRT
KRT86	1.06410102601588e-59	0.424446369270778	0.134	0.003	3.56878202105206e-55	7-KIR3DL2+ effectors	KRT86
HOPX1	4.82477232071261e-59	0.695355069105287	0.681	0.342	1.61813214092059e-54	7-KIR3DL2+ effectors	HOPX
HLA-DRB5	4.83906948205014e-59	0.538991146120856	0.31	0.063	1.62292712288997e-54	7-KIR3DL2+ effectors	HLA-DRB5
KIR2DL4	2.13728276419243e-58	0.257611256381099	0.119	0.001	7.16801893454857e-54	7-KIR3DL2+ effectors	KIR2DL4
VPS37B1	7.72981985164992e-58	0.615979579382552	0.845	0.612	2.59242698184635e-53	7-KIR3DL2+ effectors	VPS37B
GZMH1	1.68354980118643e-57	0.786113977138188	0.616	0.251	5.64628932321906e-53	7-KIR3DL2+ effectors	GZMH
PRF11	3.45855872731819e-56	0.651880701139083	0.649	0.292	1.15993142596798e-51	7-KIR3DL2+ effectors	PRF1
FAM177A11	1.16423738157225e-55	0.5601094020443	0.931	0.839	3.90461933031701e-51	7-KIR3DL2+ effectors	FAM177A1
HLA-DMA	1.68557915946632e-55	0.517771615322315	0.356	0.089	5.65309538501814e-51	7-KIR3DL2+ effectors	HLA-DMA
GTF3C11	3.13740764816336e-55	0.675891837092539	0.537	0.217	1.05222377704103e-50	7-KIR3DL2+ effectors	GTF3C1
PGK1	4.49187333256749e-55	0.564928556950199	0.925	0.819	1.50648447827648e-50	7-KIR3DL2+ effectors	PGK1
C1orf21	5.4370186832555e-55	0.49495442999983	0.328	0.073	1.82346732599023e-50	7-KIR3DL2+ effectors	C1orf21
SH2D1A	1.38859992600532e-51	0.585463202530208	0.5	0.2	4.65708643183665e-47	7-KIR3DL2+ effectors	SH2D1A
TMSB10	1.49477370195216e-51	0.285301076105029	1	1	5.01317204160715e-47	7-KIR3DL2+ effectors	TMSB10
METRNL	2.11495218931919e-51	0.569195370379262	0.506	0.198	7.09312665253869e-47	7-KIR3DL2+ effectors	METRNL
SUB1	5.47597578072705e-51	0.438710940903882	0.963	0.923	1.83653275734024e-46	7-KIR3DL2+ effectors	SUB1
ST3GAL5	5.99857571705179e-51	0.545386688299605	0.345	0.093	2.01180232398483e-46	7-KIR3DL2+ effectors	ST3GAL5
NFATC2	8.51139656088037e-51	0.595585807898489	0.573	0.26	2.85455217858806e-46	7-KIR3DL2+ effectors	NFATC2
KLRG1	1.30203438271301e-50	0.615542464135491	0.481	0.188	4.36676291274288e-46	7-KIR3DL2+ effectors	KLRG1
UBC1	1.52423304633259e-50	0.326231100237853	1	0.999	5.11197279079025e-46	7-KIR3DL2+ effectors	UBC
CCNH	8.76417983781154e-50	0.63731308692188	0.739	0.48	2.93933063400523e-45	7-KIR3DL2+ effectors	CCNH
TOX	1.98392615094372e-49	0.437930354372866	0.246	0.045	6.65369152503503e-45	7-KIR3DL2+ effectors	TOX
FGFBP21	2.11348896505311e-49	0.727659264544908	0.478	0.166	7.0882192909951e-45	7-KIR3DL2+ effectors	FGFBP2
CCDC50	3.05462735530478e-49	0.362375373594314	0.183	0.021	1.02446092242212e-44	7-KIR3DL2+ effectors	CCDC50
SAMD3	5.14337275898335e-49	0.549743717191236	0.438	0.154	1.72498435590783e-44	7-KIR3DL2+ effectors	SAMD3
LSP11	5.68570764564137e-49	0.482767471058248	0.909	0.81	1.9068726301952e-44	7-KIR3DL2+ effectors	LSP1
CRTAM	7.17972625154857e-49	0.656368715098615	0.369	0.111	2.40793659024436e-44	7-KIR3DL2+ effectors	CRTAM
CD38	9.34872120090807e-49	0.296472944473852	0.138	0.009	3.13537411636055e-44	7-KIR3DL2+ effectors	CD38
TRG-AS1	3.38313068734505e-48	0.404557920705908	0.241	0.044	1.13463436992178e-43	7-KIR3DL2+ effectors	TRG-AS1
SRSF2	6.42774117193758e-48	0.457608387038191	0.972	0.904	2.15573583424443e-43	7-KIR3DL2+ effectors	SRSF2
GFOD1	7.27416423544697e-48	0.306809309100035	0.149	0.012	2.4396092012842e-43	7-KIR3DL2+ effectors	GFOD1
PTPRC	7.40826341645359e-48	0.44022177398452	0.974	0.898	2.4845833846102e-43	7-KIR3DL2+ effectors	PTPRC
ABHD17A	9.12001099037222e-48	0.588837905024122	0.485	0.199	3.05866928595104e-43	7-KIR3DL2+ effectors	ABHD17A
MAP2K3	1.3249180692117e-47	0.626945461892444	0.608	0.32	4.44351022052222e-43	7-KIR3DL2+ effectors	MAP2K3
SRSF5	2.240757050264e-47	0.473570203633733	0.94	0.85	7.51505099517539e-43	7-KIR3DL2+ effectors	SRSF5
SELPLG	7.87719103934943e-47	0.638123506927423	0.688	0.426	2.64185233077701e-42	7-KIR3DL2+ effectors	SELPLG
CREM	2.00555285078808e-46	0.494291908897631	0.963	0.939	6.72622315097306e-42	7-KIR3DL2+ effectors	CREM
LCP11	3.26178542040812e-46	0.596119139640063	0.812	0.583	1.09393759429648e-41	7-KIR3DL2+ effectors	LCP1
OAZ1	4.49621473150144e-46	0.426190527578703	0.963	0.915	1.50794049665095e-41	7-KIR3DL2+ effectors	OAZ1
IDI1	1.03016818975074e-45	0.635756666907633	0.782	0.591	3.45497807478602e-41	7-KIR3DL2+ effectors	IDI1
CFL1	1.33564136543171e-45	0.387298488250474	0.985	0.983	4.47947401138486e-41	7-KIR3DL2+ effectors	CFL1
SMS	1.52411583454199e-44	0.525830787406866	0.379	0.13	5.11157968588691e-40	7-KIR3DL2+ effectors	SMS
WIPF1	3.50777693717103e-44	0.591397352830524	0.744	0.509	1.17643822918842e-39	7-KIR3DL2+ effectors	WIPF1
CENPF	1.10163277212541e-43	0.383773777240488	0.198	0.031	3.69465599115419e-39	7-KIR3DL2+ effectors	CENPF
ACTG1	1.52231865155165e-43	0.542106452953961	0.994	0.989	5.10555229357392e-39	7-KIR3DL2+ effectors	ACTG1
CCL4L2	1.79818968457318e-43	1.22004848937059	0.216	0.038	6.03076856412153e-39	7-KIR3DL2+ effectors	CCL4L2
EMD	4.24023381698493e-43	0.478587173098364	0.866	0.736	1.42208961754041e-38	7-KIR3DL2+ effectors	EMD
ATP5F1B	4.62107847667177e-43	0.452387464052815	0.897	0.806	1.54981729950618e-38	7-KIR3DL2+ effectors	ATP5F1B
COTL11	1.32905354072448e-42	0.610946394625579	0.713	0.495	4.45737976488177e-38	7-KIR3DL2+ effectors	COTL1
HCST1	8.04310290193236e-41	0.42966356023576	0.933	0.859	2.69749585125008e-36	7-KIR3DL2+ effectors	HCST
SLC1A4	1.38699717752244e-40	0.446139306429602	0.259	0.063	4.65171113397477e-36	7-KIR3DL2+ effectors	SLC1A4
MLF12	1.51505617620054e-40	0.514056899249299	0.476	0.194	5.08119540374136e-36	7-KIR3DL2+ effectors	MLF1
MFSD10	1.5888877275758e-40	0.496608518879354	0.541	0.272	5.32881166074371e-36	7-KIR3DL2+ effectors	MFSD10
PDIA3	2.62330613105544e-40	0.491182868538952	0.866	0.752	8.79804410233373e-36	7-KIR3DL2+ effectors	PDIA3
DNAJB6	3.26002944926117e-40	0.498230246251216	0.869	0.731	1.09334867669321e-35	7-KIR3DL2+ effectors	DNAJB6
TBX21	4.48008395841104e-40	0.49051359268272	0.388	0.138	1.5025305579719e-35	7-KIR3DL2+ effectors	TBX21
HSPE1	5.59174913315902e-40	0.585199638875596	0.851	0.749	1.87536082427887e-35	7-KIR3DL2+ effectors	HSPE1
EOMES	3.54053939193862e-39	0.358551877571212	0.179	0.029	1.18742610126837e-34	7-KIR3DL2+ effectors	EOMES
PDLIM1	6.55781389989258e-39	0.266136581926089	0.144	0.017	2.19935962574598e-34	7-KIR3DL2+ effectors	PDLIM1
TRAPPC10	9.7532161303157e-39	0.335925903252136	0.2	0.038	3.27103362578528e-34	7-KIR3DL2+ effectors	TRAPPC10
AKAP13	1.13852028755644e-38	0.536891986743382	0.679	0.448	3.8183693404068e-34	7-KIR3DL2+ effectors	AKAP13
NARF	1.19863615000887e-38	0.636239531536218	0.552	0.312	4.01998591989973e-34	7-KIR3DL2+ effectors	NARF
CSNK1D	1.29364825860254e-38	0.532096150730034	0.649	0.425	4.33863752970121e-34	7-KIR3DL2+ effectors	CSNK1D
ACTN4	4.37469637284782e-38	0.566103581332592	0.487	0.241	1.4671856695257e-33	7-KIR3DL2+ effectors	ACTN4
SPN	1.37317240885043e-37	0.55514769835008	0.528	0.272	4.60534562480257e-33	7-KIR3DL2+ effectors	SPN
SH3GLB1	1.8159084521964e-37	0.535456811148667	0.547	0.297	6.0901937669763e-33	7-KIR3DL2+ effectors	SH3GLB1
CTDP1	4.82493613091068e-37	0.505527816904334	0.453	0.209	1.61818707958482e-32	7-KIR3DL2+ effectors	CTDP1
SLC25A3	5.56109645898708e-37	0.371963828905225	0.953	0.927	1.86508053041509e-32	7-KIR3DL2+ effectors	SLC25A3
IRF4	6.20971543700196e-37	0.382487770791042	0.211	0.044	2.08261436326172e-32	7-KIR3DL2+ effectors	IRF4
REL	9.92039674716206e-37	0.510725017609069	0.864	0.768	3.32710266106321e-32	7-KIR3DL2+ effectors	REL
KLRD11	4.13794425677072e-36	0.505581720443905	0.476	0.209	1.38778374483577e-31	7-KIR3DL2+ effectors	KLRD1
CMC2	4.32407255664419e-36	0.517361923915757	0.597	0.349	1.45020745404733e-31	7-KIR3DL2+ effectors	CMC2
ADGRG1	7.24116558722588e-36	0.353826881908259	0.237	0.057	2.42854211464382e-31	7-KIR3DL2+ effectors	ADGRG1
ARF4	2.07450266468287e-35	0.50299276055918	0.782	0.647	6.95746703681342e-31	7-KIR3DL2+ effectors	ARF4
MRPL10	2.66509767635014e-35	0.507121538214261	0.513	0.261	8.93820458694311e-31	7-KIR3DL2+ effectors	MRPL10
IRF1	2.74265368910489e-35	0.489018829474941	0.888	0.775	9.19831194251997e-31	7-KIR3DL2+ effectors	IRF1
TNFSF91	4.34922356064762e-35	0.484838800931947	0.379	0.146	1.45864259777e-30	7-KIR3DL2+ effectors	TNFSF9
DGKD	7.28584228963892e-35	0.487088041940308	0.381	0.155	2.4435257870991e-30	7-KIR3DL2+ effectors	DGKD
TMBIM1	1.91958007386304e-34	0.505776393703608	0.627	0.393	6.43788765172187e-30	7-KIR3DL2+ effectors	TMBIM1
XCL11	3.29788459129308e-34	0.563139636928418	0.233	0.057	1.10604453422787e-29	7-KIR3DL2+ effectors	XCL1
MAZ	5.20858265122011e-34	0.500086250756092	0.526	0.284	1.7468544495662e-29	7-KIR3DL2+ effectors	MAZ
TNFRSF9	6.55895167863424e-34	0.272183307596601	0.129	0.016	2.19974121398035e-29	7-KIR3DL2+ effectors	TNFRSF9
RASSF5	1.38602147797983e-33	0.508687229411432	0.584	0.351	4.64843883284876e-29	7-KIR3DL2+ effectors	RASSF5
SRSF7	2.20483018383091e-33	0.44354001895585	0.944	0.896	7.3945594705321e-29	7-KIR3DL2+ effectors	SRSF7
BHLHE401	6.19857455071393e-33	0.49229599797993	0.664	0.39	2.07887793281844e-28	7-KIR3DL2+ effectors	BHLHE40
H3F3A	8.18780022199223e-33	0.306229115020504	0.974	0.964	2.74602443845175e-28	7-KIR3DL2+ effectors	H3F3A
WDR1	1.00784687644721e-32	0.513869783271965	0.636	0.442	3.38011685422866e-28	7-KIR3DL2+ effectors	WDR1
MAFF	1.53264871841628e-32	0.548249543387784	0.422	0.198	5.14019727182453e-28	7-KIR3DL2+ effectors	MAFF
SIPA1	1.67974150830822e-32	0.449186190381531	0.371	0.152	5.63351707056411e-28	7-KIR3DL2+ effectors	SIPA1
CORO1A	2.03942477750248e-32	0.384991926751875	0.918	0.842	6.83982281878781e-28	7-KIR3DL2+ effectors	CORO1A
CD7	3.73098615594744e-32	0.422285962386179	0.946	0.879	1.25129813698165e-27	7-KIR3DL2+ effectors	CD7
JPT1	2.56464815293196e-31	0.46869956465815	0.718	0.523	8.60131697530321e-27	7-KIR3DL2+ effectors	JPT1
STX11	2.94580536732366e-31	0.433700714026395	0.369	0.15	9.8796420409301e-27	7-KIR3DL2+ effectors	STX11
HSP90AA1	3.28171009729227e-31	0.446740946886167	0.981	0.96	1.10061993242988e-26	7-KIR3DL2+ effectors	HSP90AA1
ANXA6	3.48739463328608e-31	0.486749600985067	0.588	0.369	1.16960241211149e-26	7-KIR3DL2+ effectors	ANXA6
RNF19A1	7.62470798369576e-31	0.526162480931099	0.586	0.352	2.55717456357188e-26	7-KIR3DL2+ effectors	RNF19A
CNPPD1	9.90630576333272e-31	0.474538852001283	0.425	0.206	3.32237682690653e-26	7-KIR3DL2+ effectors	CNPPD1
GALNT11	4.37317783918584e-30	0.405241962420112	0.332	0.129	1.46667638370615e-25	7-KIR3DL2+ effectors	GALNT11
SYAP1	9.3174486752809e-30	0.404667459014755	0.795	0.627	3.12488593671571e-25	7-KIR3DL2+ effectors	SYAP1
ATAD3B	9.53681555592606e-30	0.3189778942302	0.179	0.041	3.19845720114648e-25	7-KIR3DL2+ effectors	ATAD3B
AKNA1	1.21475804137689e-29	0.474870176878837	0.627	0.398	4.07405551916982e-25	7-KIR3DL2+ effectors	AKNA
NCL	1.27959328667618e-29	0.33647288506875	0.95	0.91	4.29149996485456e-25	7-KIR3DL2+ effectors	NCL
PRKX	2.35986045645881e-29	0.531858732369891	0.539	0.336	7.91449999887155e-25	7-KIR3DL2+ effectors	PRKX
PTPN22	3.08123871059744e-29	0.489682259535524	0.567	0.348	1.03338583876017e-24	7-KIR3DL2+ effectors	PTPN22
SDCBP	3.32453513507938e-29	0.5122939092515	0.782	0.689	1.11498259360292e-24	7-KIR3DL2+ effectors	SDCBP
POMP	3.73874971964698e-29	0.417231471827145	0.69	0.504	1.25390188097521e-24	7-KIR3DL2+ effectors	POMP
F2R	4.98698883831691e-29	0.381680473592333	0.222	0.063	1.67253631659472e-24	7-KIR3DL2+ effectors	F2R
SYNM	5.74953186724851e-29	0.267074693635935	0.123	0.018	1.92827799763781e-24	7-KIR3DL2+ effectors	SYNM
ELOVL1	5.97188835925825e-29	0.43292282774697	0.356	0.153	2.00285191792803e-24	7-KIR3DL2+ effectors	ELOVL1
PPP2R5C	6.3962748137277e-29	0.467201228468189	0.651	0.458	2.145182647028e-24	7-KIR3DL2+ effectors	PPP2R5C
PDE7A	6.59493319586765e-29	0.439897764997898	0.295	0.109	2.21180869523009e-24	7-KIR3DL2+ effectors	PDE7A
KLHDC4	9.11800403970038e-29	0.356034783687137	0.276	0.095	3.05799619483471e-24	7-KIR3DL2+ effectors	KLHDC4
MCOLN2	1.03808013780316e-28	0.356628156775983	0.209	0.056	3.48151316616423e-24	7-KIR3DL2+ effectors	MCOLN2
FAM49B	1.29882344848232e-28	0.479653714224471	0.562	0.359	4.35599408151999e-24	7-KIR3DL2+ effectors	FAM49B
IFITM1	1.45944050980172e-28	0.394971352965369	0.97	0.955	4.89467158177301e-24	7-KIR3DL2+ effectors	IFITM1
RIPK2	1.82950785851117e-28	0.349836190938254	0.194	0.05	6.13580345587477e-24	7-KIR3DL2+ effectors	RIPK2
UNC119	7.82727636586929e-28	0.349210159723992	0.248	0.081	2.62511194758524e-23	7-KIR3DL2+ effectors	UNC119
PSMB10	8.14097482363803e-28	0.488868756429138	0.459	0.25	2.73032013635172e-23	7-KIR3DL2+ effectors	PSMB10
HMGB2	1.29311828619104e-27	0.494907412302425	0.606	0.409	4.33686010822749e-23	7-KIR3DL2+ effectors	HMGB2
UBE2F	2.07560516039893e-27	0.361410628015613	0.278	0.101	6.96116458694593e-23	7-KIR3DL2+ effectors	UBE2F
JAK1	3.55033596037544e-27	0.388992340380309	0.825	0.727	1.19071167439072e-22	7-KIR3DL2+ effectors	JAK1
ARHGDIB	4.43427610847616e-27	0.28820002406162	0.991	0.985	1.48716752126073e-22	7-KIR3DL2+ effectors	ARHGDIB
ZBP1	4.55681783768501e-27	0.313688970987936	0.194	0.051	1.5282655664028e-22	7-KIR3DL2+ effectors	ZBP1
RIOK3	5.04223247272723e-27	0.450282784568017	0.444	0.232	1.69106392670326e-22	7-KIR3DL2+ effectors	RIOK3
PYHIN1	5.33847652311484e-27	0.295065326337799	0.19	0.048	1.79041825632226e-22	7-KIR3DL2+ effectors	PYHIN1
RAB27A	9.12576089920888e-27	0.388619215216094	0.284	0.106	3.06059769037667e-22	7-KIR3DL2+ effectors	RAB27A
PPP1CA	1.17275365365535e-26	0.410582885628972	0.614	0.415	3.93318120362931e-22	7-KIR3DL2+ effectors	PPP1CA
USP36	1.49625952540929e-26	0.418448681445519	0.679	0.5	5.01815519631768e-22	7-KIR3DL2+ effectors	USP36
ARL4C	1.95744666564726e-26	0.366438040277008	0.845	0.735	6.56488462724778e-22	7-KIR3DL2+ effectors	ARL4C
HSPD1	2.03176249459944e-26	0.483038366774881	0.772	0.658	6.81412505438759e-22	7-KIR3DL2+ effectors	HSPD1
ARPC3	5.08208889980828e-26	0.348847692107447	0.836	0.75	1.7044309752177e-21	7-KIR3DL2+ effectors	ARPC3
HACD3	8.76710418397492e-26	0.382633072175423	0.289	0.115	2.94031140122151e-21	7-KIR3DL2+ effectors	HACD3
CHST7	9.36349058014941e-26	0.325459216848915	0.196	0.054	3.14032747077051e-21	7-KIR3DL2+ effectors	CHST7
YBX1	1.00733322656942e-25	0.265949880629346	0.978	0.97	3.37839417526851e-21	7-KIR3DL2+ effectors	YBX1
CALM2	1.02918190254114e-25	0.330153273906925	0.948	0.927	3.45167026474247e-21	7-KIR3DL2+ effectors	CALM2
NR4A22	1.49792599197396e-25	0.352295496681218	0.974	0.933	5.02374419188225e-21	7-KIR3DL2+ effectors	NR4A2
RGS1	1.99227452015409e-25	0.516181460288461	0.541	0.326	6.6816902856928e-21	7-KIR3DL2+ effectors	RGS1
MAPK1	3.72748074371582e-25	0.368914008619399	0.269	0.1	1.25012249182741e-20	7-KIR3DL2+ effectors	MAPK1
AC004687.1	5.3935345728653e-25	0.407990754799409	0.369	0.174	1.80888362504756e-20	7-KIR3DL2+ effectors	AC004687.1
CALR	1.30898575268969e-24	0.358222989282309	0.925	0.904	4.39007641737067e-20	7-KIR3DL2+ effectors	CALR
PPP1R16B	1.61461755911652e-24	0.465511262647531	0.457	0.256	5.415104369765e-20	7-KIR3DL2+ effectors	PPP1R16B
SYNE11	1.9097811018888e-24	0.425110226795137	0.384	0.187	6.40502385951466e-20	7-KIR3DL2+ effectors	SYNE1
CD247	2.0373586213973e-24	0.408862335989218	0.649	0.477	6.83289334444225e-20	7-KIR3DL2+ effectors	CD247
NFKBIB	2.09807189538924e-24	0.398263486001503	0.442	0.246	7.03651352275645e-20	7-KIR3DL2+ effectors	NFKBIB
LRMP	2.90544116020823e-24	0.310762150659803	0.203	0.061	9.74426856310635e-20	7-KIR3DL2+ effectors	LRMP
PSME1	3.9689112464364e-24	0.308404002392307	0.894	0.833	1.33109345382984e-19	7-KIR3DL2+ effectors	PSME1
DOK2	6.05223303967509e-24	0.460490803084133	0.541	0.353	2.02979791684623e-19	7-KIR3DL2+ effectors	DOK2
HMGN3	7.92082922817912e-24	0.400435798559721	0.442	0.246	2.65648770654671e-19	7-KIR3DL2+ effectors	HMGN3
HCLS1	1.15239170105957e-23	0.395543483812286	0.705	0.564	3.86489128701359e-19	7-KIR3DL2+ effectors	HCLS1
ITGAM	1.38609165352028e-23	0.27308810210942	0.183	0.051	4.64867418757631e-19	7-KIR3DL2+ effectors	ITGAM
HSH2D	2.91796244708025e-23	0.329558847563809	0.224	0.076	9.78626245501773e-19	7-KIR3DL2+ effectors	HSH2D
SLC7A5	4.01554540309918e-23	0.370020863220563	0.716	0.542	1.3467336172914e-18	7-KIR3DL2+ effectors	SLC7A5
NCOA1	4.39140952821923e-23	0.312019943883264	0.211	0.07	1.47279092757417e-18	7-KIR3DL2+ effectors	NCOA1
TERF2IP	6.09680634148368e-23	0.379857781598013	0.718	0.561	2.0447469108068e-18	7-KIR3DL2+ effectors	TERF2IP
FCRL6	6.11302984711416e-23	0.28814769215793	0.211	0.067	2.05018795012515e-18	7-KIR3DL2+ effectors	FCRL6
CD63	9.00046818449256e-23	0.412137470193427	0.409	0.22	3.01857701971512e-18	7-KIR3DL2+ effectors	CD63
N4BP1	1.72613645651842e-22	0.374785342537663	0.341	0.159	5.78911644787147e-18	7-KIR3DL2+ effectors	N4BP1
TENT5C	2.28713892591915e-22	0.361668136933589	0.735	0.571	7.67060652974763e-18	7-KIR3DL2+ effectors	TENT5C
BZW1	2.369781943599e-22	0.351892934987661	0.808	0.726	7.94777468244234e-18	7-KIR3DL2+ effectors	BZW1
PDCD4	2.43762712442554e-22	0.378417285938213	0.804	0.662	8.17531384989836e-18	7-KIR3DL2+ effectors	PDCD4
HMGB1	2.98939099800722e-22	0.304656726551074	0.931	0.882	1.00258195291166e-17	7-KIR3DL2+ effectors	HMGB1
STRAP	3.40642456999439e-22	0.365196968544647	0.724	0.609	1.14244667228472e-17	7-KIR3DL2+ effectors	STRAP
CLEC2B	3.73067869108938e-22	0.435834740481752	0.636	0.452	1.25119501941755e-17	7-KIR3DL2+ effectors	CLEC2B
DPP8	3.79607023030187e-22	0.324431122323496	0.254	0.1	1.27312603383864e-17	7-KIR3DL2+ effectors	DPP8
DDX6	5.45662115101713e-22	0.440502658630542	0.586	0.421	1.83004160162812e-17	7-KIR3DL2+ effectors	DDX6
EFHD21	6.16919914068433e-22	0.411919845061745	0.481	0.29	2.06902600780271e-17	7-KIR3DL2+ effectors	EFHD2
DHRS1	6.55939115466675e-22	0.286741667888592	0.159	0.043	2.19988860545213e-17	7-KIR3DL2+ effectors	DHRS1
POLR2A	8.02550830648749e-22	0.43759752578443	0.614	0.449	2.69159497582978e-17	7-KIR3DL2+ effectors	POLR2A
RNF166	1.59970854284994e-21	0.388941118412936	0.55	0.363	5.36510251101012e-17	7-KIR3DL2+ effectors	RNF166
MAP1LC3B	1.63630315596371e-21	0.344033006251588	0.802	0.683	5.4878335244711e-17	7-KIR3DL2+ effectors	MAP1LC3B
CNBD2	1.66954745498758e-21	0.373062799370648	0.272	0.116	5.59932825453734e-17	7-KIR3DL2+ effectors	CNBD2
MT2A	1.86114405573194e-21	0.390066583837676	0.858	0.705	6.24190493411378e-17	7-KIR3DL2+ effectors	MT2A
ZAP70	3.48059240551361e-21	0.381969665539292	0.591	0.43	1.16732108096116e-16	7-KIR3DL2+ effectors	ZAP70
ARHGDIA	3.71283375074681e-21	0.311289068378517	0.823	0.701	1.24521018332546e-16	7-KIR3DL2+ effectors	ARHGDIA
ITPRIP	4.70955002442048e-21	0.402316901025761	0.394	0.215	1.57948888719014e-16	7-KIR3DL2+ effectors	ITPRIP
ARF6	6.62808215348725e-21	0.401882245100778	0.621	0.46	2.22292619263655e-16	7-KIR3DL2+ effectors	ARF6
B4GALT1	8.23672985896328e-21	0.435939941987692	0.56	0.382	2.7624344600991e-16	7-KIR3DL2+ effectors	B4GALT1
UBE2A	9.33662651929567e-21	0.361888899819828	0.649	0.498	3.13131780204138e-16	7-KIR3DL2+ effectors	UBE2A
PAFAH1B1	1.08574421597006e-20	0.370152798355432	0.623	0.462	3.64136895152038e-16	7-KIR3DL2+ effectors	PAFAH1B1
TPM3	1.45934173241971e-20	0.296863131731837	0.866	0.772	4.89434030218921e-16	7-KIR3DL2+ effectors	TPM3
GCH1	1.5170376005648e-20	0.393703952340962	0.47	0.286	5.08784070477423e-16	7-KIR3DL2+ effectors	GCH1
NAA501	1.94390085258826e-20	0.407053593587055	0.44	0.254	6.51945467941049e-16	7-KIR3DL2+ effectors	NAA50
SLC38A1	2.18136103226773e-20	0.375625127098343	0.731	0.605	7.3158486300195e-16	7-KIR3DL2+ effectors	SLC38A1
C12orf751	2.3802928772199e-20	0.37108086532145	0.567	0.373	7.9830262516201e-16	7-KIR3DL2+ effectors	C12orf75
TSEN34	2.48028799962129e-20	0.367848205243298	0.267	0.115	8.31838989312988e-16	7-KIR3DL2+ effectors	TSEN34
MYO1F1	3.23504868420148e-20	0.334443513765376	0.42	0.23	1.08497062770749e-15	7-KIR3DL2+ effectors	MYO1F
TRMO	3.4744132732168e-20	0.342658463969296	0.261	0.11	1.16524872357145e-15	7-KIR3DL2+ effectors	TRMO
RHOA	3.48181436330477e-20	0.299979679015455	0.875	0.839	1.16773090116515e-15	7-KIR3DL2+ effectors	RHOA
BSG	3.65647499657194e-20	0.387527692432029	0.647	0.509	1.2263085843503e-15	7-KIR3DL2+ effectors	BSG
JOSD1	3.89176417928982e-20	0.430356727239974	0.524	0.355	1.30521987045022e-15	7-KIR3DL2+ effectors	JOSD1
PLEK	4.03634765877868e-20	0.251480542080139	0.17	0.05	1.35371027780119e-15	7-KIR3DL2+ effectors	PLEK
RIN3	4.1257541695513e-20	0.338443792069967	0.228	0.089	1.38369543338411e-15	7-KIR3DL2+ effectors	RIN3
PER2	4.30891626881555e-20	0.256781196609438	0.177	0.055	1.44512433823536e-15	7-KIR3DL2+ effectors	PER2
RHOF	5.02601467856172e-20	0.377668127504319	0.597	0.425	1.68562480289603e-15	7-KIR3DL2+ effectors	RHOF
ZBTB7A	5.0881184035268e-20	0.340737607803324	0.325	0.158	1.70645315017482e-15	7-KIR3DL2+ effectors	ZBTB7A
SUPV3L1	6.62257108017785e-20	0.375219151283171	0.399	0.228	2.22107788887005e-15	7-KIR3DL2+ effectors	SUPV3L1
ITGAL	9.16601571795913e-20	0.360849459777235	0.377	0.201	3.07409835148913e-15	7-KIR3DL2+ effectors	ITGAL
DR1	1.25311894233506e-19	0.372435813588884	0.403	0.229	4.20271030880333e-15	7-KIR3DL2+ effectors	DR1
LRRFIP1	1.84498287618245e-19	0.353483053084364	0.843	0.771	6.1877035701407e-15	7-KIR3DL2+ effectors	LRRFIP1
PSME2	1.98183290511041e-19	0.358353087725662	0.688	0.558	6.64667119715928e-15	7-KIR3DL2+ effectors	PSME2
ZDHHC7	2.08717858026397e-19	0.343639866358395	0.259	0.112	6.99997952248929e-15	7-KIR3DL2+ effectors	ZDHHC7
G6PD	2.18127518385417e-19	0.336733176350794	0.312	0.151	7.31556071161013e-15	7-KIR3DL2+ effectors	G6PD
RAB8B	2.5543950282963e-19	0.36187024218373	0.461	0.288	8.56693004590013e-15	7-KIR3DL2+ effectors	RAB8B
CCDC93	3.46277455073916e-19	0.37344599854045	0.321	0.161	1.1613453288269e-14	7-KIR3DL2+ effectors	CCDC93
PLEKHA2	4.95565878317186e-19	0.388027343769473	0.532	0.372	1.66202884270018e-14	7-KIR3DL2+ effectors	PLEKHA2
TSEN54	8.18766734109546e-19	0.35902354514489	0.47	0.294	2.7459798728566e-14	7-KIR3DL2+ effectors	TSEN54
BAK1	9.36443875037094e-19	0.310530291098847	0.267	0.119	3.14064546809941e-14	7-KIR3DL2+ effectors	BAK1
SIGIRR	9.80297911727198e-19	0.351941370941263	0.571	0.419	3.28772313635068e-14	7-KIR3DL2+ effectors	SIGIRR
PSMB6	1.22843602407279e-18	0.343198116672828	0.599	0.456	4.11992873753533e-14	7-KIR3DL2+ effectors	PSMB6
APOL6	1.31967744630938e-18	0.416968015594746	0.364	0.201	4.42593421943239e-14	7-KIR3DL2+ effectors	APOL6
PTRHD1	1.38100121935768e-18	0.385741969141295	0.377	0.216	4.63160188948178e-14	7-KIR3DL2+ effectors	PTRHD1
TENT4B	1.64126046158876e-18	0.33589333451963	0.267	0.12	5.50445933607638e-14	7-KIR3DL2+ effectors	TENT4B
RIC8A	1.80019898927665e-18	0.379004003538119	0.53	0.367	6.03750737023604e-14	7-KIR3DL2+ effectors	RIC8A
LBR	1.93554144741937e-18	0.374577546808987	0.386	0.222	6.49141890635508e-14	7-KIR3DL2+ effectors	LBR
EIF4EBP1	2.35855092884012e-18	0.296106678877056	0.211	0.081	7.91010810514398e-14	7-KIR3DL2+ effectors	EIF4EBP1
PITPNC1	2.42134814826121e-18	0.371445380957437	0.442	0.271	8.12071741963844e-14	7-KIR3DL2+ effectors	PITPNC1
NAPA	2.55789457068724e-18	0.33171053915573	0.644	0.52	8.57866681117086e-14	7-KIR3DL2+ effectors	NAPA
SERPINB1	2.85023304949909e-18	0.39920994388688	0.476	0.317	9.55911160141005e-14	7-KIR3DL2+ effectors	SERPINB1
ASL	3.43872113620473e-18	0.254085392886808	0.172	0.057	1.15327829466034e-13	7-KIR3DL2+ effectors	ASL
RAB29	3.76218512183317e-18	0.384267235566036	0.407	0.24	1.26176164616041e-13	7-KIR3DL2+ effectors	RAB29
SERTAD3	5.18945880843961e-18	0.255907331561039	0.172	0.058	1.74044069517448e-13	7-KIR3DL2+ effectors	SERTAD3
CRIP11	5.49906676485781e-18	0.328197673582955	0.838	0.737	1.84427701159801e-13	7-KIR3DL2+ effectors	CRIP1
CD58	6.65342747343545e-18	0.345462495127889	0.31	0.157	2.23142650604078e-13	7-KIR3DL2+ effectors	CD58
RNF125	1.01946431114775e-17	0.393677271640255	0.763	0.693	3.41907940672732e-13	7-KIR3DL2+ effectors	RNF125
PAXX	1.06506016833734e-17	0.348427248060334	0.647	0.5	3.57199879256978e-13	7-KIR3DL2+ effectors	PAXX
DBF4	1.1193512029113e-17	0.378580502945857	0.455	0.292	3.75408006432391e-13	7-KIR3DL2+ effectors	DBF4
UPP1	1.18475250851576e-17	0.408195739835004	0.429	0.264	3.97342296306017e-13	7-KIR3DL2+ effectors	UPP1
MYADM1	1.23494253472294e-17	0.274543276029029	0.963	0.963	4.14175027295378e-13	7-KIR3DL2+ effectors	MYADM
LAP3	1.29068298984237e-17	0.366407917564997	0.483	0.326	4.32869261133334e-13	7-KIR3DL2+ effectors	LAP3
FAM160B1	1.63016113853573e-17	0.294201723512387	0.254	0.112	5.46723442642113e-13	7-KIR3DL2+ effectors	FAM160B1
SAR1A	2.28311905621551e-17	0.34562522158176	0.5	0.344	7.65712469073558e-13	7-KIR3DL2+ effectors	SAR1A
TM9SF1	2.29777392114623e-17	0.348864540568829	0.256	0.119	7.70627417674024e-13	7-KIR3DL2+ effectors	TM9SF1
SASH3	2.41607178162936e-17	0.309047748845662	0.263	0.121	8.10302154122856e-13	7-KIR3DL2+ effectors	SASH3
LAX1	3.18390579265492e-17	0.293681170814637	0.194	0.073	1.06781832474061e-12	7-KIR3DL2+ effectors	LAX1
PCNT	3.45227302467989e-17	0.282293554287885	0.213	0.085	1.15782332701714e-12	7-KIR3DL2+ effectors	PCNT
FBXO34	3.59985173019736e-17	0.382134362171837	0.375	0.223	1.20731827327359e-12	7-KIR3DL2+ effectors	FBXO34
ADAM8	3.64562672176475e-17	0.348301485681872	0.332	0.178	1.22267028994546e-12	7-KIR3DL2+ effectors	ADAM8
SH3KBP1	3.76386493974468e-17	0.378544050727493	0.483	0.322	1.26232502349157e-12	7-KIR3DL2+ effectors	SH3KBP1
CD3D	4.08769955264892e-17	0.308331957294797	0.847	0.797	1.37093267596739e-12	7-KIR3DL2+ effectors	CD3D
MAP2K7	4.7909251515852e-17	0.328069043274323	0.315	0.163	1.60678047733864e-12	7-KIR3DL2+ effectors	MAP2K7
DDIT4	5.06053053692833e-17	0.28003439659416	0.772	0.616	1.69720073147502e-12	7-KIR3DL2+ effectors	DDIT4
PDE4A	5.2237243370137e-17	0.263176013841523	0.194	0.073	1.75193266814766e-12	7-KIR3DL2+ effectors	PDE4A
CIB1	6.07024103913204e-17	0.344743418808515	0.709	0.599	2.0358374397041e-12	7-KIR3DL2+ effectors	CIB1
PSMB1	6.43081693530688e-17	0.310503872460513	0.707	0.596	2.15676738376322e-12	7-KIR3DL2+ effectors	PSMB1
ISG20	7.72337917698435e-17	0.36923819661312	0.688	0.568	2.59026690837701e-12	7-KIR3DL2+ effectors	ISG20
ATP8A1	1.20743029441166e-16	0.380412208361986	0.334	0.184	4.04947972139782e-12	7-KIR3DL2+ effectors	ATP8A1
NDUFB2	1.31658869479473e-16	0.345336259110895	0.649	0.525	4.41557516460256e-12	7-KIR3DL2+ effectors	NDUFB2
ETF1	1.64632652939635e-16	0.350311682375366	0.638	0.524	5.52144991428947e-12	7-KIR3DL2+ effectors	ETF1
ARID5B1	1.92762824881384e-16	0.352548424696679	0.457	0.283	6.46487962087185e-12	7-KIR3DL2+ effectors	ARID5B
ACTR3	2.44657452357741e-16	0.348046987249329	0.517	0.366	8.20532163717391e-12	7-KIR3DL2+ effectors	ACTR3
HNRNPA2B1	3.47020380549037e-16	0.274187597874264	0.847	0.805	1.16383695228536e-11	7-KIR3DL2+ effectors	HNRNPA2B1
TAX1BP1	3.47520500279061e-16	0.312552483199842	0.603	0.466	1.16551425383591e-11	7-KIR3DL2+ effectors	TAX1BP1
KBTBD2	3.92761551890084e-16	0.325474465679328	0.336	0.184	1.31724369272896e-11	7-KIR3DL2+ effectors	KBTBD2
VASP	4.62526680301401e-16	0.333275683597051	0.457	0.305	1.55122198039484e-11	7-KIR3DL2+ effectors	VASP
STAT5A	5.85554829658829e-16	0.308270847797633	0.328	0.177	1.96383378770978e-11	7-KIR3DL2+ effectors	STAT5A
MATK1	7.25014294285437e-16	0.291825675944608	0.517	0.34	2.4315529401745e-11	7-KIR3DL2+ effectors	MATK
FABP5	9.88280691490475e-16	0.367056213439452	0.422	0.259	3.31449578312076e-11	7-KIR3DL2+ effectors	FABP5
FMNL1	1.03114366132729e-15	0.356225969724377	0.463	0.302	3.45824961135947e-11	7-KIR3DL2+ effectors	FMNL1
ISG20L2	1.13734441072844e-15	0.37635971098329	0.397	0.253	3.81442568470105e-11	7-KIR3DL2+ effectors	ISG20L2
FBXO7	1.36929427854093e-15	0.347411653609642	0.513	0.379	4.59233915137056e-11	7-KIR3DL2+ effectors	FBXO7
2007-09-01	1.44069909545951e-15	0.29972002915708	0.696	0.579	4.83181662635211e-11	7-KIR3DL2+ effectors	2007-09-01
PPP4C	1.47609942903889e-15	0.300816505956669	0.517	0.369	4.95054226511063e-11	7-KIR3DL2+ effectors	PPP4C
SLC1A5	1.59837462523988e-15	0.372898108487745	0.427	0.279	5.36062881812952e-11	7-KIR3DL2+ effectors	SLC1A5
NDUFB7	2.05337183025047e-15	0.331256655407185	0.446	0.297	6.88659844429402e-11	7-KIR3DL2+ effectors	NDUFB7
MVD	2.31308261716198e-15	0.334339128527729	0.293	0.154	7.75761648143786e-11	7-KIR3DL2+ effectors	MVD
HMGN1	2.78840643207757e-15	0.311661659060985	0.698	0.597	9.35175749190174e-11	7-KIR3DL2+ effectors	HMGN1
ITGA41	2.85186785758645e-15	0.331253966930175	0.513	0.371	9.56459442077344e-11	7-KIR3DL2+ effectors	ITGA4
GTPBP8	2.96658038994299e-15	0.27172998875927	0.224	0.101	9.9493173117908e-11	7-KIR3DL2+ effectors	GTPBP8
ANXA111	3.22766390970471e-15	0.327955455482585	0.623	0.518	1.08249392203676e-10	7-KIR3DL2+ effectors	ANXA11
NELFCD	3.42436532344805e-15	0.32388022464664	0.293	0.158	1.14846364217801e-10	7-KIR3DL2+ effectors	NELFCD
SERPINB9	4.12486662764276e-15	0.40485058989729	0.554	0.421	1.38339776957883e-10	7-KIR3DL2+ effectors	SERPINB9
UBE2L6	4.17894577785454e-15	0.330171416253147	0.36	0.212	1.40153483497686e-10	7-KIR3DL2+ effectors	UBE2L6
SURF4	4.31729616469932e-15	0.326434031534295	0.588	0.449	1.44793478771686e-10	7-KIR3DL2+ effectors	SURF4
ENO1	5.46925161322705e-15	0.272542438083509	0.696	0.573	1.83427760604409e-10	7-KIR3DL2+ effectors	ENO1
TMEM50A	6.35579741218433e-15	0.270697054842959	0.685	0.569	2.13160733609838e-10	7-KIR3DL2+ effectors	TMEM50A
GLRX	6.42266504038139e-15	0.350178972579825	0.328	0.185	2.15403340124311e-10	7-KIR3DL2+ effectors	GLRX
LASP1	1.01099969788479e-14	0.274343651370478	0.295	0.154	3.39069078676601e-10	7-KIR3DL2+ effectors	LASP1
PSMB9	1.12374394372197e-14	0.298630916395262	0.532	0.38	3.76881243845474e-10	7-KIR3DL2+ effectors	PSMB9
PRKCB	1.24939392448029e-14	0.370693693922392	0.315	0.18	4.19021734392199e-10	7-KIR3DL2+ effectors	PRKCB
SFT2D1	2.47937983423586e-14	0.255040548826107	0.188	0.078	8.31534408806023e-10	7-KIR3DL2+ effectors	SFT2D1
CBLB	3.33506440184407e-14	0.343916819702258	0.412	0.265	1.11851389909046e-09	7-KIR3DL2+ effectors	CBLB
UBE2J1	3.87876210705711e-14	0.337943908463397	0.476	0.342	1.30085923546481e-09	7-KIR3DL2+ effectors	UBE2J1
MEF2D	3.88761999801293e-14	0.298795172323646	0.259	0.129	1.30382999493358e-09	7-KIR3DL2+ effectors	MEF2D
CDK17	4.09628666798057e-14	0.287671976382016	0.64	0.491	1.37381262270732e-09	7-KIR3DL2+ effectors	CDK17
CXCR31	4.50183413779964e-14	0.336458204813249	0.543	0.371	1.50982513313524e-09	7-KIR3DL2+ effectors	CXCR3
TAP1	4.76997583160585e-14	0.346019074589848	0.446	0.306	1.59975449440397e-09	7-KIR3DL2+ effectors	TAP1
KPNA2	4.95314266922407e-14	0.334353741319846	0.647	0.534	1.66118498840437e-09	7-KIR3DL2+ effectors	KPNA2
DERL1	6.45423061060352e-14	0.305693170593774	0.463	0.327	2.16461986218421e-09	7-KIR3DL2+ effectors	DERL1
RNF115	7.04809033174491e-14	0.30288042109984	0.371	0.229	2.36378853546061e-09	7-KIR3DL2+ effectors	RNF115
RARRES3	8.72869616715723e-14	0.280469186569525	0.737	0.641	2.92743012054119e-09	7-KIR3DL2+ effectors	RARRES3
ADSS	9.2521236478217e-14	0.361628216942459	0.496	0.37	3.10297722900644e-09	7-KIR3DL2+ effectors	ADSS
SUMO1	9.39426989381057e-14	0.301173780490824	0.558	0.452	3.15065023698619e-09	7-KIR3DL2+ effectors	SUMO1
POLR2L	9.56502611942269e-14	0.269931517868464	0.78	0.716	3.20791845993198e-09	7-KIR3DL2+ effectors	POLR2L
APOBEC3C	9.64539847789337e-14	0.252709827803855	0.207	0.092	3.23487374151588e-09	7-KIR3DL2+ effectors	APOBEC3C
SHKBP1	9.84711416285616e-14	0.271484427733702	0.325	0.189	3.3025251479387e-09	7-KIR3DL2+ effectors	SHKBP1
HIST1H1C	1.00068066404735e-13	0.338976660412912	0.246	0.124	3.35608281108202e-09	7-KIR3DL2+ effectors	HIST1H1C
BCLAF1	1.06476031868168e-13	0.281146560070331	0.731	0.651	3.57099315679463e-09	7-KIR3DL2+ effectors	BCLAF1
CLIC11	1.14061574393073e-13	0.293876291902512	0.713	0.622	3.82539708199489e-09	7-KIR3DL2+ effectors	CLIC1
TACC1	1.20060251465349e-13	0.301589615668857	0.371	0.232	4.02658071364489e-09	7-KIR3DL2+ effectors	TACC1
SCAND1	1.22167407116969e-13	0.3086862390176	0.582	0.46	4.0972504998889e-09	7-KIR3DL2+ effectors	SCAND1
ZNF276	1.3490367333801e-13	0.283284856780477	0.246	0.123	4.52439939641019e-09	7-KIR3DL2+ effectors	ZNF276
TAPBP	1.36337877524765e-13	0.296702949429378	0.601	0.49	4.57249973642558e-09	7-KIR3DL2+ effectors	TAPBP
RUNX31	1.4159727774897e-13	0.287996274590674	0.694	0.562	4.74888950114496e-09	7-KIR3DL2+ effectors	RUNX3
RBM39	2.0602430109698e-13	0.255793967440706	0.825	0.767	6.90964301019052e-09	7-KIR3DL2+ effectors	RBM39
LYAR1	2.18476056892412e-13	0.259245582167367	0.627	0.459	7.32724999605771e-09	7-KIR3DL2+ effectors	LYAR
TBCD	2.30517881354001e-13	0.274717191183095	0.209	0.097	7.7311087048505e-09	7-KIR3DL2+ effectors	TBCD
SLFN5	2.5182977446124e-13	0.274171926672749	0.341	0.2	8.44586697588106e-09	7-KIR3DL2+ effectors	SLFN5
PSMD13	2.93203341831658e-13	0.313809846476933	0.459	0.331	9.83345367835015e-09	7-KIR3DL2+ effectors	PSMD13
NR4A3	3.23802054143511e-13	0.3689999012306	0.636	0.516	1.08596732918651e-08	7-KIR3DL2+ effectors	NR4A3
CAP1	3.48311986765743e-13	0.296349259070279	0.489	0.357	1.16816874121495e-08	7-KIR3DL2+ effectors	CAP1
ATP6V1B2	3.52432414172844e-13	0.296349044569386	0.261	0.139	1.18198783065288e-08	7-KIR3DL2+ effectors	ATP6V1B2
NUCB2	5.89351648866247e-13	0.295026797764503	0.409	0.271	1.97656755996762e-08	7-KIR3DL2+ effectors	NUCB2
TOP1	6.56210405869095e-13	0.280345296211577	0.683	0.582	2.20079845920377e-08	7-KIR3DL2+ effectors	TOP1
MSN1	8.39708295168381e-13	0.278535222110541	0.655	0.534	2.81621368033572e-08	7-KIR3DL2+ effectors	MSN
GZMB1	9.31309620438889e-13	0.331247851373765	0.412	0.24	3.12342620502795e-08	7-KIR3DL2+ effectors	GZMB
DBI	9.35664195820505e-13	0.270770938762418	0.595	0.482	3.13803057994281e-08	7-KIR3DL2+ effectors	DBI
POLB	9.52329805702e-13	0.331894234395715	0.293	0.17	3.19392370236337e-08	7-KIR3DL2+ effectors	POLB
CHIC2	1.02194456398221e-12	0.281829692439644	0.528	0.403	3.42739767868353e-08	7-KIR3DL2+ effectors	CHIC2
RGS2	1.2162104360742e-12	0.3610165042657	0.485	0.351	4.07892656050564e-08	7-KIR3DL2+ effectors	RGS2
CASP3	1.34800752009422e-12	0.279870859147305	0.272	0.149	4.520947620892e-08	7-KIR3DL2+ effectors	CASP3
CD164	1.64137772805391e-12	0.34042721460354	0.498	0.386	5.50485262434721e-08	7-KIR3DL2+ effectors	CD164
SS18L2	1.84476449849528e-12	0.328239458570026	0.608	0.523	6.18697117505348e-08	7-KIR3DL2+ effectors	SS18L2
ZFAND6	1.9316147261638e-12	0.294679258997759	0.427	0.304	6.47824946860817e-08	7-KIR3DL2+ effectors	ZFAND6
TPST2	2.01970599895339e-12	0.272862041630437	0.312	0.18	6.77368997928988e-08	7-KIR3DL2+ effectors	TPST2
CDK6	2.11842169426623e-12	0.304496865842287	0.233	0.12	7.10476267823007e-08	7-KIR3DL2+ effectors	CDK6
TLN1	2.48902873574627e-12	0.326118096977627	0.351	0.219	8.34770457394584e-08	7-KIR3DL2+ effectors	TLN1
MYO1G	3.18518941107421e-12	0.302374827346261	0.453	0.324	1.06824882468607e-07	7-KIR3DL2+ effectors	MYO1G
DNAJC1	3.78733207525415e-12	0.27021541827674	0.332	0.199	1.27019543139874e-07	7-KIR3DL2+ effectors	DNAJC1
ANP32A	3.94293927334118e-12	0.304852176467933	0.315	0.188	1.32238297349317e-07	7-KIR3DL2+ effectors	ANP32A
RAB2A	5.98659911726307e-12	0.295027333092873	0.539	0.44	2.00778561194769e-07	7-KIR3DL2+ effectors	RAB2A
TCIRG1	6.07499367293726e-12	0.289517359379834	0.315	0.194	2.0374313780297e-07	7-KIR3DL2+ effectors	TCIRG1
PSMB8	6.34863469121288e-12	0.307505405759617	0.558	0.459	2.12920510273898e-07	7-KIR3DL2+ effectors	PSMB8
SRRM1	6.97133140079949e-12	0.253410892296788	0.828	0.778	2.33804512520013e-07	7-KIR3DL2+ effectors	SRRM1
CCND2	7.03292461139639e-12	0.395377582768755	0.442	0.324	2.35870225617012e-07	7-KIR3DL2+ effectors	CCND2
ANXA7	9.60893968366939e-12	0.262294328047288	0.442	0.317	3.22264619110904e-07	7-KIR3DL2+ effectors	ANXA7
RAB5IF	1.00753310393606e-11	0.324765639723078	0.47	0.363	3.37906452398075e-07	7-KIR3DL2+ effectors	RAB5IF
SKIL	1.09076759929705e-11	0.316200352642696	0.429	0.304	3.65821637452244e-07	7-KIR3DL2+ effectors	SKIL
RNF213	1.14896055244326e-11	0.304446535961756	0.528	0.421	3.85338390078421e-07	7-KIR3DL2+ effectors	RNF213
CALM3	1.30678126658493e-11	0.308368918610793	0.496	0.385	4.38268301187254e-07	7-KIR3DL2+ effectors	CALM3
RALY	1.53373261681821e-11	0.298940539163465	0.567	0.464	5.14383245028492e-07	7-KIR3DL2+ effectors	RALY
HSPA51	1.6042691168711e-11	0.288528436181026	0.981	0.967	5.38039776416228e-07	7-KIR3DL2+ effectors	HSPA5
CFLAR	1.62435920688396e-11	0.295352905708882	0.358	0.228	5.44777590804741e-07	7-KIR3DL2+ effectors	CFLAR
PSMB3	1.96837232571796e-11	0.280360875603849	0.483	0.38	6.60152710599289e-07	7-KIR3DL2+ effectors	PSMB3
TLE3	2.27708600837694e-11	0.273962551226583	0.246	0.135	7.63689105489457e-07	7-KIR3DL2+ effectors	TLE3
FNBP1	2.40154364706795e-11	0.312469792363785	0.61	0.526	8.05429708353649e-07	7-KIR3DL2+ effectors	FNBP1
ZFAND2B	3.05627714639281e-11	0.267368060747967	0.295	0.176	1.02501422935722e-06	7-KIR3DL2+ effectors	ZFAND2B
STARD7	3.0993218631621e-11	0.329087690551804	0.394	0.272	1.03945056646731e-06	7-KIR3DL2+ effectors	STARD7
NDUFA12	3.43204797668555e-11	0.311946562595568	0.444	0.329	1.1510402504208e-06	7-KIR3DL2+ effectors	NDUFA12
BUB3	3.55712685799857e-11	0.312598310085293	0.476	0.37	1.19298920563556e-06	7-KIR3DL2+ effectors	BUB3
RMC1	3.80624263437621e-11	0.264797696610152	0.248	0.138	1.27653765471709e-06	7-KIR3DL2+ effectors	RMC1
DIP2A	5.3687191604125e-11	0.294596756906863	0.287	0.169	1.80056103201914e-06	7-KIR3DL2+ effectors	DIP2A
TRAT11	6.38864470868251e-11	0.261429074618695	0.347	0.223	2.14262366239794e-06	7-KIR3DL2+ effectors	TRAT1
DCXR	6.89225857816863e-11	0.268555968613782	0.569	0.451	2.31152568194619e-06	7-KIR3DL2+ effectors	DCXR
TECR	9.34552529823908e-11	0.252768063077895	0.662	0.566	3.13430227452342e-06	7-KIR3DL2+ effectors	TECR
ORAI1	1.07373479688013e-10	0.298554325692855	0.401	0.281	3.60109176177657e-06	7-KIR3DL2+ effectors	ORAI1
HNRNPA3	1.0928525402701e-10	0.270217949275744	0.601	0.509	3.66520884955786e-06	7-KIR3DL2+ effectors	HNRNPA3
FKBP1A	1.15163603808983e-10	0.267501976561611	0.513	0.412	3.86235694454567e-06	7-KIR3DL2+ effectors	FKBP1A
RFTN1	1.19565702031913e-10	0.278940858345663	0.338	0.217	4.00999451474629e-06	7-KIR3DL2+ effectors	RFTN1
TMEM9B	1.2876008575389e-10	0.253946935373129	0.386	0.268	4.31835575601398e-06	7-KIR3DL2+ effectors	TMEM9B
HNRNPUL1	1.6819399604439e-10	0.257516677467026	0.703	0.627	5.64089023933675e-06	7-KIR3DL2+ effectors	HNRNPUL1
MAPRE2	1.714860758719e-10	0.269827709967167	0.634	0.546	5.75130001259178e-06	7-KIR3DL2+ effectors	MAPRE2
MIDN	1.85797135501316e-10	0.281894745646417	0.489	0.377	6.23126433044314e-06	7-KIR3DL2+ effectors	MIDN
PLIN2	2.45374016418716e-10	0.343189220508158	0.338	0.222	8.22935376265088e-06	7-KIR3DL2+ effectors	PLIN2
NDUFV1	3.09671109479937e-10	0.289400770768701	0.427	0.323	1.03857496697381e-05	7-KIR3DL2+ effectors	NDUFV1
AHSA1	3.50227337015443e-10	0.252798182063765	0.287	0.176	1.17459244288239e-05	7-KIR3DL2+ effectors	AHSA1
BUD31	3.62177099421662e-10	0.263032667025232	0.586	0.497	1.21466955604037e-05	7-KIR3DL2+ effectors	BUD31
ITCH	3.68863117023771e-10	0.250410860833826	0.233	0.127	1.23709312187432e-05	7-KIR3DL2+ effectors	ITCH
GNAS	4.48675272694973e-10	0.265712237028997	0.554	0.462	1.5047671295644e-05	7-KIR3DL2+ effectors	GNAS
NCKAP1L	4.79844897893139e-10	0.256785644527091	0.22	0.12	1.60930381855401e-05	7-KIR3DL2+ effectors	NCKAP1L
TRPC4AP	4.85977123906175e-10	0.265442421318619	0.31	0.199	1.62987007815653e-05	7-KIR3DL2+ effectors	TRPC4AP
AREG2	6.41473187490296e-10	0.334821562747467	0.463	0.337	2.15137277620496e-05	7-KIR3DL2+ effectors	AREG
ROCK1	7.6207240399973e-10	0.283758953111956	0.44	0.329	2.55583842853429e-05	7-KIR3DL2+ effectors	ROCK1
CASP4	8.06479578757709e-10	0.289754787003368	0.427	0.321	2.7047712112376e-05	7-KIR3DL2+ effectors	CASP4
SHISA5	9.45450599330823e-10	0.253116080329243	0.407	0.299	3.17085222003571e-05	7-KIR3DL2+ effectors	SHISA5
SRA1	1.03362061694942e-09	0.26172922859508	0.379	0.272	3.46655682512496e-05	7-KIR3DL2+ effectors	SRA1
EIF1AX	1.04448625322945e-09	0.294086228594181	0.64	0.583	3.50299799608094e-05	7-KIR3DL2+ effectors	EIF1AX
SPPL2A	1.08286457497902e-09	0.266641937974924	0.25	0.146	3.63171121156465e-05	7-KIR3DL2+ effectors	SPPL2A
DYNC1H1	1.2120746634265e-09	0.317107334015697	0.422	0.32	4.06505600619979e-05	7-KIR3DL2+ effectors	DYNC1H1
RIOK1	1.58196313362799e-09	0.250937912714682	0.297	0.187	5.30558795756155e-05	7-KIR3DL2+ effectors	RIOK1
PTPRA	1.92045808961977e-09	0.25549342065039	0.261	0.158	6.44083234096678e-05	7-KIR3DL2+ effectors	PTPRA
CASP8	2.01844922896637e-09	0.277018556718234	0.347	0.235	6.7694750241074e-05	7-KIR3DL2+ effectors	CASP8
ZNF184	3.01846422437169e-09	0.275304127746777	0.209	0.115	0.000101233253156978	7-KIR3DL2+ effectors	ZNF184
TPM4	3.75815807282859e-09	0.334996131592133	0.582	0.514	0.000126041105446525	7-KIR3DL2+ effectors	TPM4
ACTR2	3.80033065313368e-09	0.256972709327238	0.466	0.369	0.000127455489444797	7-KIR3DL2+ effectors	ACTR2
RELB	4.07963314674174e-09	0.280479379406146	0.558	0.475	0.000136822736475425	7-KIR3DL2+ effectors	RELB
RALGAPA1	4.32214243448532e-09	0.264342393115836	0.631	0.549	0.000144956012967769	7-KIR3DL2+ effectors	RALGAPA1
2002-09-01	4.41072100829144e-09	0.276234843072652	0.364	0.261	0.000147926761176078	7-KIR3DL2+ effectors	2002-09-01
HSPH11	4.53826251307693e-09	0.307885695476722	0.655	0.6	0.000152204248163574	7-KIR3DL2+ effectors	HSPH1
CCNDBP1	4.58736403339889e-09	0.257432698144433	0.353	0.248	0.000153851014952132	7-KIR3DL2+ effectors	CCNDBP1
TFDP2	5.3499427876745e-09	0.253609504477075	0.233	0.134	0.000179426381213027	7-KIR3DL2+ effectors	TFDP2
DIAPH1	6.98880799296471e-09	0.260490043677889	0.381	0.273	0.00023439064246805	7-KIR3DL2+ effectors	DIAPH1
LSM14A	7.31001800193514e-09	0.279834916452116	0.459	0.371	0.000245163383748901	7-KIR3DL2+ effectors	LSM14A
GOLPH3	8.09511747173814e-09	0.276827231942849	0.44	0.355	0.000271494049767154	7-KIR3DL2+ effectors	GOLPH3
SMG1	8.82168363732073e-09	0.263077937296229	0.332	0.224	0.000295861625828463	7-KIR3DL2+ effectors	SMG1
DNAAF2	9.33745124392989e-09	0.364099318002377	0.397	0.299	0.000313159439818921	7-KIR3DL2+ effectors	DNAAF2
CCPG1	9.81723013765929e-09	0.262796564862649	0.321	0.22	0.000329250264356817	7-KIR3DL2+ effectors	CCPG1
TROVE2	1.3457315798162e-08	0.255147458306062	0.315	0.213	0.000451331457238756	7-KIR3DL2+ effectors	TROVE2
RSRP1	1.43068365796324e-08	0.256154055228186	0.571	0.485	0.000479822685207711	7-KIR3DL2+ effectors	RSRP1
TMEM43	1.51622730443632e-08	0.251161300391813	0.353	0.25	0.000508512313361852	7-KIR3DL2+ effectors	TMEM43
NOP58	1.67498735090707e-08	0.288701745629595	0.634	0.609	0.000561757257747215	7-KIR3DL2+ effectors	NOP58
SP100	1.8973184177865e-08	0.255369626459394	0.433	0.336	0.000636322650957237	7-KIR3DL2+ effectors	SP100
RABGAP1L	2.36684768880722e-08	0.266856016267069	0.302	0.201	0.000793793377872166	7-KIR3DL2+ effectors	RABGAP1L
H2AFJ	2.47356794702821e-08	0.270497464645641	0.319	0.223	0.000829585218074322	7-KIR3DL2+ effectors	H2AFJ
DNAJC2	2.79547503135343e-08	0.258210154970279	0.373	0.271	0.000937546416015312	7-KIR3DL2+ effectors	DNAJC2
VSIR	2.80784755421429e-08	0.306001378480233	0.403	0.31	0.000941695912732388	7-KIR3DL2+ effectors	VSIR
IFNG	3.25310595286008e-08	0.255553241485882	0.134	0.061	0.00109102667447021	7-KIR3DL2+ effectors	IFNG
KLRB11	3.31181750190301e-08	0.325428023910959	0.192	0.104	0.00111071735378823	7-KIR3DL2+ effectors	KLRB1
PRKAR2A	4.38340108855922e-08	0.271180905582155	0.371	0.272	0.00147010505708099	7-KIR3DL2+ effectors	PRKAR2A
NEAT1	5.12284585274958e-08	0.286047207770468	0.659	0.592	0.00171810004209515	7-KIR3DL2+ effectors	NEAT1
BTG2	7.9699540653392e-08	0.264214919155347	0.718	0.635	0.00267296319443346	7-KIR3DL2+ effectors	BTG2
ZBTB1	1.37017102780022e-07	0.266229421326384	0.511	0.434	0.00459527959303639	7-KIR3DL2+ effectors	ZBTB1
CD5	1.59049970072286e-07	0.252364273591767	0.543	0.462	0.00533421789628431	7-KIR3DL2+ effectors	CD5
TRAF4	2.59426154179881e-07	0.256601303248777	0.308	0.218	0.00870063435888486	7-KIR3DL2+ effectors	TRAF4
PRPF4B	3.38990136977847e-07	0.260198364497956	0.399	0.313	0.011369051213963	7-KIR3DL2+ effectors	PRPF4B
CHORDC1	3.90819657324501e-07	0.256912534789977	0.252	0.167	0.0131073096673491	7-KIR3DL2+ effectors	CHORDC1
GNAI3	4.05234791638255e-07	0.260341413005819	0.461	0.398	0.0135907644419638	7-KIR3DL2+ effectors	GNAI3
UQCRC2	5.00396335692268e-07	0.304413041989346	0.407	0.327	0.0167822923064473	7-KIR3DL2+ effectors	UQCRC2
CDC42SE1	5.76300514934177e-07	0.253437515997548	0.427	0.346	0.0193279666698624	7-KIR3DL2+ effectors	CDC42SE1
AC020916.1	4.15224004521787e-06	0.316816951926012	0.336	0.257	0.139257826636517	7-KIR3DL2+ effectors	AC020916.1
