# Supplementary material for: Splicing Patterns in SF3B1 -Mutated Uveal Melanoma Generate Shared Immunogenic Tumor-Specific Neoepitopes
Source: Oxford University Press journal article supplement (doi:10.1158/2159-8290.cd-20-0555), 2021-04-02
Supplement: cd-20-0555_supplementary_table_s4_suppst4.xlsx [file cd-20-0555_supplementary_table_s4_suppst4.xlsx]

## Sheet: UM1
	Majority Cluster	Frequency
merged_1	2-Cytotoxic effectors	2259
merged_2	5-Helper-like	50
merged_3	5-Helper-like	40
merged_4	6-CCR9+ effectors	15
merged_5	1-Naive	8
merged_6	6-CCR9+ effectors	5
merged_7	6-CCR9+ effectors	5
clonotype12	1-Naive	3
clonotype13	1-Naive	3
clonotype16	2-Cytotoxic effectors	3
clonotype19	6-CCR9+ effectors	2
clonotype20	6-CCR9+ effectors	2
clonotype21	1-Naive	2
clonotype23	2-Cytotoxic effectors	2
clonotype100	1-Naive	1
clonotype101	1-Naive	1
clonotype102	4-Activated	1
clonotype103	7-KIR3DL2+ effectors	1
clonotype104	1-Naive	1
clonotype105	6-CCR9+ effectors	1
clonotype106	2-Cytotoxic effectors	1
clonotype107	1-Naive	1
clonotype108	1-Naive	1
clonotype109	1-Naive	1
clonotype110	1-Naive	1
clonotype111	2-Cytotoxic effectors	1
clonotype112	1-Naive	1
clonotype113	1-Naive	1
clonotype114	6-CCR9+ effectors	1
clonotype115	1-Naive	1
clonotype116	5-Helper-like	1
clonotype117	1-Naive	1
clonotype118	1-Naive	1
clonotype119	5-Helper-like	1
clonotype120	1-Naive	1
clonotype121	1-Naive	1
clonotype122	1-Naive	1
clonotype123	1-Naive	1
clonotype124	5-Helper-like	1
clonotype125	1-Naive	1
clonotype126	1-Naive	1
clonotype127	1-Naive	1
clonotype128	2-Cytotoxic effectors	1
clonotype129	1-Naive	1
clonotype130	1-Naive	1
clonotype131	1-Naive	1
clonotype133	2-Cytotoxic effectors	1
clonotype134	1-Naive	1
clonotype135	1-Naive	1
clonotype137	1-Naive	1
clonotype138	1-Naive	1
clonotype139	1-Naive	1
clonotype140	1-Naive	1
clonotype141	1-Naive	1
clonotype142	1-Naive	1
clonotype144	1-Naive	1
clonotype145	1-Naive	1
clonotype146	1-Naive	1
clonotype147	1-Naive	1
clonotype148	1-Naive	1
clonotype149	1-Naive	1
clonotype150	1-Naive	1
clonotype151	1-Naive	1
clonotype152	1-Naive	1
clonotype154	1-Naive	1
clonotype155	1-Naive	1
clonotype156	1-Naive	1
clonotype157	1-Naive	1
clonotype158	1-Naive	1
clonotype159	1-Naive	1
clonotype160	1-Naive	1
clonotype161	7-KIR3DL2+ effectors	1
clonotype163	7-KIR3DL2+ effectors	1
clonotype164	7-KIR3DL2+ effectors	1
clonotype165	1-Naive	1
clonotype166	1-Naive	1
clonotype167	1-Naive	1
clonotype168	1-Naive	1
clonotype169	1-Naive	1
clonotype170	1-Naive	1
clonotype171	1-Naive	1
clonotype172	1-Naive	1
clonotype173	7-KIR3DL2+ effectors	1
clonotype174	3-Resident	1
clonotype175	1-Naive	1
clonotype176	1-Naive	1
clonotype178	2-Cytotoxic effectors	1
clonotype179	1-Naive	1
clonotype180	1-Naive	1
clonotype181	1-Naive	1
clonotype182	1-Naive	1
clonotype183	1-Naive	1
clonotype184	1-Naive	1
clonotype185	1-Naive	1
clonotype186	1-Naive	1
clonotype187	7-KIR3DL2+ effectors	1
clonotype188	1-Naive	1
clonotype189	1-Naive	1
clonotype190	1-Naive	1
clonotype191	7-KIR3DL2+ effectors	1
clonotype192	1-Naive	1
clonotype194	7-KIR3DL2+ effectors	1
clonotype195	1-Naive	1
clonotype197	1-Naive	1
clonotype198	1-Naive	1
clonotype199	1-Naive	1
clonotype200	1-Naive	1
clonotype201	1-Naive	1
clonotype202	1-Naive	1
clonotype203	1-Naive	1
clonotype204	1-Naive	1
clonotype205	1-Naive	1
clonotype206	2-Cytotoxic effectors	1
clonotype207	1-Naive	1
clonotype208	1-Naive	1
clonotype209	1-Naive	1
clonotype210	2-Cytotoxic effectors	1
clonotype211	4-Activated	1
clonotype213	3-Resident	1
clonotype215	6-CCR9+ effectors	1
clonotype216	1-Naive	1
clonotype217	1-Naive	1
clonotype218	6-CCR9+ effectors	1
clonotype219	4-Activated	1
clonotype22	5-Helper-like	1
clonotype220	1-Naive	1
clonotype221	1-Naive	1
clonotype222	1-Naive	1
clonotype223	1-Naive	1
clonotype224	1-Naive	1
clonotype225	2-Cytotoxic effectors	1
clonotype226	7-KIR3DL2+ effectors	1
clonotype228	1-Naive	1
clonotype229	7-KIR3DL2+ effectors	1
clonotype230	1-Naive	1
clonotype231	5-Helper-like	1
clonotype232	7-KIR3DL2+ effectors	1
clonotype233	1-Naive	1
clonotype234	1-Naive	1
clonotype235	6-CCR9+ effectors	1
clonotype236	1-Naive	1
clonotype238	4-Activated	1
clonotype239	1-Naive	1
clonotype24	1-Naive	1
clonotype240	1-Naive	1
clonotype242	2-Cytotoxic effectors	1
clonotype243	7-KIR3DL2+ effectors	1
clonotype245	1-Naive	1
clonotype246	4-Activated	1
clonotype247	1-Naive	1
clonotype248	7-KIR3DL2+ effectors	1
clonotype249	1-Naive	1
clonotype25	1-Naive	1
clonotype250	1-Naive	1
clonotype251	7-KIR3DL2+ effectors	1
clonotype252	7-KIR3DL2+ effectors	1
clonotype253	4-Activated	1
clonotype254	1-Naive	1
clonotype255	1-Naive	1
clonotype256	1-Naive	1
clonotype257	1-Naive	1
clonotype258	1-Naive	1
clonotype259	1-Naive	1
clonotype26	1-Naive	1
clonotype260	1-Naive	1
clonotype261	1-Naive	1
clonotype262	1-Naive	1
clonotype264	7-KIR3DL2+ effectors	1
clonotype265	1-Naive	1
clonotype266	1-Naive	1
clonotype267	1-Naive	1
clonotype268	1-Naive	1
clonotype269	7-KIR3DL2+ effectors	1
clonotype270	2-Cytotoxic effectors	1
clonotype271	1-Naive	1
clonotype272	1-Naive	1
clonotype273	1-Naive	1
clonotype274	1-Naive	1
clonotype275	1-Naive	1
clonotype276	3-Resident	1
clonotype279	1-Naive	1
clonotype28	1-Naive	1
clonotype280	3-Resident	1
clonotype281	1-Naive	1
clonotype282	7-KIR3DL2+ effectors	1
clonotype283	1-Naive	1
clonotype284	7-KIR3DL2+ effectors	1
clonotype285	4-Activated	1
clonotype286	1-Naive	1
clonotype287	1-Naive	1
clonotype288	1-Naive	1
clonotype289	1-Naive	1
clonotype29	1-Naive	1
clonotype290	1-Naive	1
clonotype291	1-Naive	1
clonotype292	1-Naive	1
clonotype293	1-Naive	1
clonotype294	7-KIR3DL2+ effectors	1
clonotype295	1-Naive	1
clonotype296	1-Naive	1
clonotype298	1-Naive	1
clonotype299	1-Naive	1
clonotype30	1-Naive	1
clonotype300	1-Naive	1
clonotype301	1-Naive	1
clonotype302	1-Naive	1
clonotype303	1-Naive	1
clonotype304	1-Naive	1
clonotype305	6-CCR9+ effectors	1
clonotype307	1-Naive	1
clonotype309	1-Naive	1
clonotype31	2-Cytotoxic effectors	1
clonotype310	1-Naive	1
clonotype311	1-Naive	1
clonotype312	1-Naive	1
clonotype313	1-Naive	1
clonotype314	2-Cytotoxic effectors	1
clonotype315	5-Helper-like	1
clonotype316	1-Naive	1
clonotype317	1-Naive	1
clonotype318	1-Naive	1
clonotype319	1-Naive	1
clonotype32	1-Naive	1
clonotype320	1-Naive	1
clonotype321	1-Naive	1
clonotype322	1-Naive	1
clonotype323	1-Naive	1
clonotype324	1-Naive	1
clonotype325	1-Naive	1
clonotype326	7-KIR3DL2+ effectors	1
clonotype327	1-Naive	1
clonotype328	1-Naive	1
clonotype329	2-Cytotoxic effectors	1
clonotype33	6-CCR9+ effectors	1
clonotype330	1-Naive	1
clonotype331	1-Naive	1
clonotype332	1-Naive	1
clonotype333	7-KIR3DL2+ effectors	1
clonotype334	1-Naive	1
clonotype335	7-KIR3DL2+ effectors	1
clonotype336	1-Naive	1
clonotype337	1-Naive	1
clonotype338	1-Naive	1
clonotype339	1-Naive	1
clonotype34	1-Naive	1
clonotype340	1-Naive	1
clonotype341	6-CCR9+ effectors	1
clonotype342	1-Naive	1
clonotype343	7-KIR3DL2+ effectors	1
clonotype344	1-Naive	1
clonotype345	2-Cytotoxic effectors	1
clonotype346	2-Cytotoxic effectors	1
clonotype347	1-Naive	1
clonotype349	1-Naive	1
clonotype35	7-KIR3DL2+ effectors	1
clonotype350	1-Naive	1
clonotype351	1-Naive	1
clonotype352	1-Naive	1
clonotype353	1-Naive	1
clonotype354	1-Naive	1
clonotype355	1-Naive	1
clonotype356	1-Naive	1
clonotype357	7-KIR3DL2+ effectors	1
clonotype358	1-Naive	1
clonotype359	1-Naive	1
clonotype36	1-Naive	1
clonotype360	7-KIR3DL2+ effectors	1
clonotype361	1-Naive	1
clonotype362	1-Naive	1
clonotype363	1-Naive	1
clonotype364	1-Naive	1
clonotype365	1-Naive	1
clonotype366	7-KIR3DL2+ effectors	1
clonotype367	1-Naive	1
clonotype368	1-Naive	1
clonotype369	1-Naive	1
clonotype37	1-Naive	1
clonotype370	1-Naive	1
clonotype371	2-Cytotoxic effectors	1
clonotype372	1-Naive	1
clonotype373	1-Naive	1
clonotype374	2-Cytotoxic effectors	1
clonotype375	1-Naive	1
clonotype376	1-Naive	1
clonotype377	1-Naive	1
clonotype378	1-Naive	1
clonotype379	1-Naive	1
clonotype38	1-Naive	1
clonotype380	1-Naive	1
clonotype381	1-Naive	1
clonotype382	1-Naive	1
clonotype383	1-Naive	1
clonotype384	5-Helper-like	1
clonotype385	3-Resident	1
clonotype386	1-Naive	1
clonotype388	1-Naive	1
clonotype389	1-Naive	1
clonotype39	3-Resident	1
clonotype390	1-Naive	1
clonotype391	1-Naive	1
clonotype392	6-CCR9+ effectors	1
clonotype393	1-Naive	1
clonotype394	1-Naive	1
clonotype395	1-Naive	1
clonotype397	1-Naive	1
clonotype398	2-Cytotoxic effectors	1
clonotype399	1-Naive	1
clonotype40	1-Naive	1
clonotype400	1-Naive	1
clonotype401	1-Naive	1
clonotype402	1-Naive	1
clonotype403	1-Naive	1
clonotype404	1-Naive	1
clonotype405	2-Cytotoxic effectors	1
clonotype406	1-Naive	1
clonotype407	1-Naive	1
clonotype408	1-Naive	1
clonotype409	1-Naive	1
clonotype41	1-Naive	1
clonotype42	3-Resident	1
clonotype43	7-KIR3DL2+ effectors	1
clonotype44	1-Naive	1
clonotype45	4-Activated	1
clonotype46	1-Naive	1
clonotype47	5-Helper-like	1
clonotype48	1-Naive	1
clonotype49	1-Naive	1
clonotype50	1-Naive	1
clonotype51	2-Cytotoxic effectors	1
clonotype52	1-Naive	1
clonotype54	1-Naive	1
clonotype56	1-Naive	1
clonotype57	7-KIR3DL2+ effectors	1
clonotype58	1-Naive	1
clonotype59	1-Naive	1
clonotype61	1-Naive	1
clonotype62	1-Naive	1
clonotype63	7-KIR3DL2+ effectors	1
clonotype64	6-CCR9+ effectors	1
clonotype65	1-Naive	1
clonotype66	6-CCR9+ effectors	1
clonotype68	4-Activated	1
clonotype69	1-Naive	1
clonotype70	1-Naive	1
clonotype71	3-Resident	1
clonotype72	1-Naive	1
clonotype73	1-Naive	1
clonotype74	7-KIR3DL2+ effectors	1
clonotype75	1-Naive	1
clonotype76	7-KIR3DL2+ effectors	1
clonotype77	1-Naive	1
clonotype78	1-Naive	1
clonotype79	1-Naive	1
clonotype80	1-Naive	1
clonotype81	1-Naive	1
clonotype82	5-Helper-like	1
clonotype83	1-Naive	1
clonotype84	1-Naive	1
clonotype85	7-KIR3DL2+ effectors	1
clonotype86	2-Cytotoxic effectors	1
clonotype87	7-KIR3DL2+ effectors	1
clonotype88	1-Naive	1
clonotype89	1-Naive	1
clonotype90	1-Naive	1
clonotype91	1-Naive	1
clonotype92	1-Naive	1
clonotype93	1-Naive	1
clonotype94	4-Activated	1
clonotype95	1-Naive	1
clonotype96	1-Naive	1
clonotype97	1-Naive	1
clonotype98	1-Naive	1
clonotype99	1-Naive	1

## Sheet: UM2_3
Merged clonotype	Majority Cluster	Frequency	Majority specificity
merged_2	2-Cytotoxic effectors	542	UM2-A2:26
merged_1	7-KIR3DL2+ effectors	413	UM2-A2:14
merged_4	5-Helper-like UM3	231	UM3-A2:18
merged_3	3-Activated	219	UM2-A2:17
merged_5	6-CCR9+ effectors	55	UM2-A2:37
merged_6	2-Cytotoxic effectors	40	UM2-A2:37
merged_8	4-Helper-like UM2	25	UM2-A2:17
merged_7	3-Activated	23	UM2-A2:37
merged_13	3-Activated	17	UM2-A2:17
merged_11	3-Activated	16	UM2-A2:14
merged_14	4-Helper-like UM2	13	UM2-A2:37
merged_9	2-Cytotoxic effectors	13	UM2-A2:37
merged_12	3-Activated	12	UM2-A2:37
merged_18	2-Cytotoxic effectors	9	UM2-A2:26
merged_16	2-Cytotoxic effectors	7	UM2-A2:17
merged_17	1-Naive	7	UM2-A2:17
merged_19	4-Helper-like UM2	7	UM2-A2:17
merged_15	3-Activated	6	UM2-A2:14
merged_27	3-Activated	6	UM2-A2:37
merged_20	3-Activated	5	UM2-A2:17
merged_22	3-Activated	5	UM2-A2:17
merged_25	3-Activated	5	UM2-A2:37
merged_10	4-Helper-like UM2	4	UM2-A2:17
merged_21	2-Cytotoxic effectors	4	UM2-A2:37
clonotype60	2-Cytotoxic effectors	3	UM2-A2:37
clonotype91	3-Activated	3	UM2-A2:37
clonotype95	3-Activated	3	UM2-A2:37
clonotype97	4-Helper-like UM2	3	UM2-A2:14
merged_23	3-Activated	3	UM2-A2:37
merged_24	7-KIR3DL2+ effectors	3	UM2-A2:37
clonotype103	1-Naive	2	UM2-A2:37
clonotype107	6-CCR9+ effectors	2	UM2-A2:37
clonotype114	2-Cytotoxic effectors	2	UM2-A2:37
clonotype115	2-Cytotoxic effectors	2	UM2-A2:17
clonotype138	4-Helper-like UM2	2	UM2-A2:17
clonotype147	1-Naive	2	UM2-A2:26
clonotype151	3-Activated	2	UM2-A2:17
clonotype153	1-Naive	2	UM2-A2:26
clonotype161	3-Activated	2	UM2-A2:37
clonotype162	5-Helper-like UM3	2	UM3-A2:18
clonotype41	5-Helper-like UM3	2	UM2-A2:14
clonotype63	2-Cytotoxic effectors	2	UM2-A2:26
clonotype86	3-Activated	2	UM2-A2:37
clonotype93	1-Naive	2	UM2-A2:14
clonotype1000	1-Naive	1	UM2-A2:37
clonotype1002	1-Naive	1	UM2-A2:37
clonotype1004	1-Naive	1	UM2-A2:17
clonotype1010	1-Naive	1	UM2-A2:37
clonotype1011	3-Activated	1	UM2-A2:37
clonotype1012	1-Naive	1	UM2-A2:17
clonotype1013	6-CCR9+ effectors	1	UM2-A2:37
clonotype1014	1-Naive	1	UM2-A2:37
clonotype1015	1-Naive	1	UM2-A2:14
clonotype1019	3-Activated	1	UM2-A2:17
clonotype1021	1-Naive	1	UM2-A2:17
clonotype1024	1-Naive	1	UM2-A2:37
clonotype1030	1-Naive	1	UM2-A2:17
clonotype1032	2-Cytotoxic effectors	1	UM2-A2:14
clonotype1033	1-Naive	1	UM2-A2:37
clonotype1035	1-Naive	1	UM2-A2:17
clonotype1037	1-Naive	1	UM2-A2:37
clonotype1038	1-Naive	1	UM2-A2:37
clonotype104	7-KIR3DL2+ effectors	1	UM2-A2:17
clonotype1041	1-Naive	1	UM2-A2:37
clonotype1045	1-Naive	1	UM2-A2:37
clonotype1046	4-Helper-like UM2	1	UM2-A2:37
clonotype106	3-Activated	1	UM2-A2:37
clonotype109	1-Naive	1	UM2-A2:37
clonotype118	4-Helper-like UM2	1	UM2-A2:26
clonotype119	3-Activated	1	UM2-A2:14
clonotype122	1-Naive	1	UM2-A2:17
clonotype123	1-Naive	1	UM2-A2:17
clonotype127	4-Helper-like UM2	1	UM2-A2:14
clonotype129	4-Helper-like UM2	1	UM2-A2:26
clonotype134	1-Naive	1	UM2-A2:37
clonotype137	3-Activated	1	UM2-A2:37
clonotype140	1-Naive	1	UM2-A2:37
clonotype148	4-Helper-like UM2	1	UM2-A2:17
clonotype149	7-KIR3DL2+ effectors	1	UM2-A2:37
clonotype152	4-Helper-like UM2	1	UM2-A2:37
clonotype160	4-Helper-like UM2	1	UM2-A2:17
clonotype166	1-Naive	1	UM2-A2:37
clonotype168	2-Cytotoxic effectors	1	UM3-A2:18
clonotype170	3-Activated	1	UM2-A2:37
clonotype176	1-Naive	1	UM2-A2:17
clonotype180	1-Naive	1	UM2-A2:14
clonotype183	3-Activated	1	UM2-A2:26
clonotype188	1-Naive	1	UM2-A2:14
clonotype189	6-CCR9+ effectors	1	UM2-A2:37
clonotype193	1-Naive	1	UM2-A2:26
clonotype194	1-Naive	1	UM2-A2:37
clonotype195	1-Naive	1	UM2-A2:17
clonotype200	4-Helper-like UM2	1	UM2-A2:37
clonotype201	1-Naive	1	UM2-A2:26
clonotype204	1-Naive	1	UM2-A2:37
clonotype205	1-Naive	1	UM2-A2:17
clonotype206	1-Naive	1	UM2-A2:37
clonotype208	1-Naive	1	UM2-A2:14
clonotype212	1-Naive	1	UM2-A2:37
clonotype213	1-Naive	1	UM2-A2:37
clonotype217	3-Activated	1	UM2-A2:37
clonotype219	1-Naive	1	UM2-A2:37
clonotype221	4-Helper-like UM2	1	UM2-A2:14
clonotype222	1-Naive	1	UM2-A2:17
clonotype225	1-Naive	1	UM2-A2:37
clonotype229	4-Helper-like UM2	1	UM2-A2:17
clonotype234	1-Naive	1	UM2-A2:37
clonotype235	1-Naive	1	UM2-A2:17
clonotype236	3-Activated	1	UM2-A2:17
clonotype237	1-Naive	1	UM2-A2:17
clonotype238	1-Naive	1	UM2-A2:14
clonotype239	1-Naive	1	UM2-A2:37
clonotype242	1-Naive	1	UM3-A2:18
clonotype247	4-Helper-like UM2	1	UM2-A2:37
clonotype248	1-Naive	1	UM2-A2:37
clonotype250	1-Naive	1	UM2-A2:37
clonotype255	1-Naive	1	UM2-A2:14
clonotype258	1-Naive	1	UM2-A2:37
clonotype266	1-Naive	1	UM2-A2:37
clonotype267	5-Helper-like UM3	1	UM3-A2:18
clonotype269	1-Naive	1	UM2-A2:26
clonotype274	1-Naive	1	UM2-A2:37
clonotype280	1-Naive	1	UM2-A2:17
clonotype281	3-Activated	1	UM2-A2:17
clonotype282	4-Helper-like UM2	1	UM2-A2:37
clonotype283	3-Activated	1	UM2-A2:37
clonotype284	1-Naive	1	UM2-A2:14
clonotype285	6-CCR9+ effectors	1	UM2-A2:37
clonotype287	1-Naive	1	UM2-A2:37
clonotype290	1-Naive	1	UM2-A2:37
clonotype292	1-Naive	1	UM2-A2:37
clonotype299	4-Helper-like UM2	1	UM2-A2:17
clonotype305	1-Naive	1	UM2-A2:37
clonotype307	1-Naive	1	UM2-A2:37
clonotype308	1-Naive	1	UM2-A2:37
clonotype310	1-Naive	1	UM2-A2:37
clonotype314	3-Activated	1	UM2-A2:37
clonotype321	2-Cytotoxic effectors	1	UM2-A2:37
clonotype322	1-Naive	1	UM2-A2:17
clonotype324	1-Naive	1	UM2-A2:37
clonotype328	1-Naive	1	UM2-A2:37
clonotype333	1-Naive	1	UM2-A2:37
clonotype336	1-Naive	1	UM2-A2:37
clonotype338	1-Naive	1	UM2-A2:14
clonotype339	3-Activated	1	UM2-A2:14
clonotype341	1-Naive	1	UM2-A2:17
clonotype342	2-Cytotoxic effectors	1	UM2-A2:37
clonotype344	1-Naive	1	UM2-A2:37
clonotype345	1-Naive	1	UM2-A2:17
clonotype346	1-Naive	1	UM2-A2:37
clonotype349	1-Naive	1	UM2-A2:26
clonotype352	1-Naive	1	UM2-A2:14
clonotype357	3-Activated	1	UM2-A2:37
clonotype358	1-Naive	1	UM2-A2:37
clonotype360	1-Naive	1	UM2-A2:37
clonotype367	1-Naive	1	UM2-A2:37
clonotype368	3-Activated	1	UM2-A2:37
clonotype376	1-Naive	1	UM2-A2:37
clonotype382	1-Naive	1	UM2-A2:37
clonotype383	1-Naive	1	UM2-A2:37
clonotype384	2-Cytotoxic effectors	1	UM2-A2:37
clonotype385	1-Naive	1	UM2-A2:37
clonotype387	1-Naive	1	UM2-A2:37
clonotype388	1-Naive	1	UM2-A2:37
clonotype389	1-Naive	1	UM3-A2:18
clonotype394	1-Naive	1	UM2-A2:17
clonotype396	1-Naive	1	UM2-A2:17
clonotype397	1-Naive	1	UM2-A2:37
clonotype402	3-Activated	1	UM2-A2:37
clonotype403	1-Naive	1	UM2-A2:37
clonotype404	4-Helper-like UM2	1	UM2-A2:37
clonotype405	1-Naive	1	UM2-A2:37
clonotype406	1-Naive	1	UM2-A2:37
clonotype407	1-Naive	1	UM2-A2:37
clonotype408	7-KIR3DL2+ effectors	1	UM2-A2:37
clonotype409	1-Naive	1	UM2-A2:17
clonotype410	1-Naive	1	UM2-A2:37
clonotype413	1-Naive	1	UM2-A2:37
clonotype417	4-Helper-like UM2	1	UM2-A2:17
clonotype419	1-Naive	1	UM2-A2:26
clonotype421	1-Naive	1	UM2-A2:37
clonotype422	1-Naive	1	UM2-A2:37
clonotype423	1-Naive	1	UM2-A2:17
clonotype425	3-Activated	1	UM2-A2:37
clonotype426	1-Naive	1	UM2-A2:14
clonotype427	1-Naive	1	UM2-A2:14
clonotype434	1-Naive	1	UM2-A2:37
clonotype435	3-Activated	1	UM2-A2:37
clonotype436	1-Naive	1	UM2-A2:17
clonotype440	3-Activated	1	UM2-A2:37
clonotype442	1-Naive	1	UM2-A2:37
clonotype445	1-Naive	1	UM2-A2:37
clonotype447	1-Naive	1	UM2-A2:37
clonotype448	1-Naive	1	UM2-A2:14
clonotype450	3-Activated	1	UM2-A2:37
clonotype451	1-Naive	1	UM2-A2:14
clonotype452	1-Naive	1	UM2-A2:14
clonotype454	1-Naive	1	UM2-A2:14
clonotype457	6-CCR9+ effectors	1	UM2-A2:37
clonotype459	1-Naive	1	UM2-A2:37
clonotype461	4-Helper-like UM2	1	UM2-A2:37
clonotype462	1-Naive	1	UM2-A2:37
clonotype463	1-Naive	1	UM2-A2:17
clonotype464	1-Naive	1	UM2-A2:37
clonotype465	1-Naive	1	UM2-A2:26
clonotype473	1-Naive	1	UM2-A2:37
clonotype475	1-Naive	1	UM2-A2:37
clonotype476	1-Naive	1	UM3-A2:18
clonotype477	1-Naive	1	UM2-A2:14
clonotype478	1-Naive	1	UM2-A2:37
clonotype480	1-Naive	1	UM2-A2:37
clonotype483	1-Naive	1	UM2-A2:14
clonotype484	4-Helper-like UM2	1	UM2-A2:37
clonotype485	1-Naive	1	UM2-A2:17
clonotype488	1-Naive	1	UM2-A2:37
clonotype489	3-Activated	1	UM2-A2:26
clonotype490	1-Naive	1	UM2-A2:37
clonotype497	1-Naive	1	UM2-A2:37
clonotype499	1-Naive	1	UM2-A2:37
clonotype503	1-Naive	1	UM2-A2:37
clonotype504	4-Helper-like UM2	1	UM2-A2:17
clonotype507	3-Activated	1	UM2-A2:37
clonotype509	1-Naive	1	UM2-A2:37
clonotype510	1-Naive	1	UM2-A2:37
clonotype514	7-KIR3DL2+ effectors	1	UM2-A2:37
clonotype518	1-Naive	1	UM2-A2:14
clonotype522	1-Naive	1	UM2-A2:37
clonotype523	1-Naive	1	UM2-A2:37
clonotype535	1-Naive	1	UM2-A2:17
clonotype539	1-Naive	1	UM2-A2:14
clonotype541	1-Naive	1	UM2-A2:17
clonotype542	1-Naive	1	UM3-A2:18
clonotype543	3-Activated	1	UM2-A2:37
clonotype545	1-Naive	1	UM3-A2:18
clonotype546	4-Helper-like UM2	1	UM2-A2:14
clonotype552	1-Naive	1	UM2-A2:37
clonotype553	2-Cytotoxic effectors	1	UM2-A2:37
clonotype554	3-Activated	1	UM2-A2:37
clonotype560	1-Naive	1	UM2-A2:37
clonotype564	4-Helper-like UM2	1	UM2-A2:37
clonotype566	1-Naive	1	UM2-A2:37
clonotype568	1-Naive	1	UM2-A2:17
clonotype571	1-Naive	1	UM2-A2:37
clonotype572	3-Activated	1	UM2-A2:37
clonotype574	1-Naive	1	UM2-A2:14
clonotype575	1-Naive	1	UM2-A2:14
clonotype578	3-Activated	1	UM2-A2:37
clonotype579	1-Naive	1	UM2-A2:37
clonotype580	1-Naive	1	UM2-A2:37
clonotype581	1-Naive	1	UM2-A2:17
clonotype585	1-Naive	1	UM2-A2:37
clonotype589	1-Naive	1	UM2-A2:17
clonotype592	1-Naive	1	UM2-A2:37
clonotype596	1-Naive	1	UM2-A2:37
clonotype598	1-Naive	1	UM2-A2:17
clonotype600	1-Naive	1	UM2-A2:37
clonotype601	4-Helper-like UM2	1	UM2-A2:17
clonotype602	1-Naive	1	UM2-A2:37
clonotype603	2-Cytotoxic effectors	1	UM2-A2:37
clonotype605	1-Naive	1	UM2-A2:17
clonotype606	1-Naive	1	UM2-A2:37
clonotype607	3-Activated	1	UM2-A2:37
clonotype612	1-Naive	1	UM2-A2:26
clonotype613	1-Naive	1	UM2-A2:17
clonotype615	1-Naive	1	UM2-A2:37
clonotype616	1-Naive	1	UM2-A2:17
clonotype617	6-CCR9+ effectors	1	UM2-A2:17
clonotype620	1-Naive	1	UM2-A2:37
clonotype621	1-Naive	1	UM2-A2:17
clonotype622	1-Naive	1	UM2-A2:14
clonotype624	1-Naive	1	UM2-A2:14
clonotype625	1-Naive	1	UM2-A2:14
clonotype627	1-Naive	1	UM2-A2:37
clonotype631	1-Naive	1	UM2-A2:26
clonotype632	1-Naive	1	UM2-A2:37
clonotype633	1-Naive	1	UM2-A2:37
clonotype635	4-Helper-like UM2	1	UM2-A2:37
clonotype636	7-KIR3DL2+ effectors	1	UM2-A2:26
clonotype637	1-Naive	1	UM2-A2:17
clonotype638	1-Naive	1	UM2-A2:37
clonotype640	1-Naive	1	UM2-A2:37
clonotype642	1-Naive	1	UM2-A2:37
clonotype644	3-Activated	1	UM2-A2:37
clonotype645	1-Naive	1	UM2-A2:37
clonotype647	1-Naive	1	UM2-A2:37
clonotype655	3-Activated	1	UM2-A2:17
clonotype656	1-Naive	1	UM2-A2:37
clonotype657	2-Cytotoxic effectors	1	UM2-A2:37
clonotype658	1-Naive	1	UM2-A2:17
clonotype660	1-Naive	1	UM2-A2:17
clonotype662	1-Naive	1	UM2-A2:37
clonotype663	1-Naive	1	UM2-A2:14
clonotype664	1-Naive	1	UM2-A2:17
clonotype665	1-Naive	1	UM2-A2:37
clonotype666	1-Naive	1	UM2-A2:26
clonotype669	1-Naive	1	UM2-A2:37
clonotype670	1-Naive	1	UM2-A2:14
clonotype675	1-Naive	1	UM2-A2:37
clonotype677	1-Naive	1	UM2-A2:37
clonotype680	1-Naive	1	UM2-A2:17
clonotype683	1-Naive	1	UM3-A2:18
clonotype684	1-Naive	1	UM2-A2:37
clonotype686	1-Naive	1	UM2-A2:37
clonotype690	1-Naive	1	UM3-A2:18
clonotype698	2-Cytotoxic effectors	1	UM2-A2:37
clonotype701	3-Activated	1	UM2-A2:37
clonotype703	1-Naive	1	UM2-A2:26
clonotype705	1-Naive	1	UM2-A2:17
clonotype706	1-Naive	1	UM2-A2:17
clonotype711	1-Naive	1	UM2-A2:37
clonotype715	1-Naive	1	UM2-A2:37
clonotype721	1-Naive	1	UM2-A2:37
clonotype723	1-Naive	1	UM2-A2:17
clonotype725	1-Naive	1	UM2-A2:17
clonotype726	1-Naive	1	UM2-A2:37
clonotype732	1-Naive	1	UM2-A2:26
clonotype733	1-Naive	1	UM2-A2:17
clonotype734	1-Naive	1	UM2-A2:37
clonotype735	1-Naive	1	UM2-A2:37
clonotype737	6-CCR9+ effectors	1	UM2-A2:37
clonotype739	1-Naive	1	UM2-A2:37
clonotype741	2-Cytotoxic effectors	1	UM2-A2:37
clonotype742	1-Naive	1	UM2-A2:14
clonotype744	1-Naive	1	UM2-A2:14
clonotype748	3-Activated	1	UM2-A2:37
clonotype749	4-Helper-like UM2	1	UM2-A2:37
clonotype750	1-Naive	1	UM2-A2:17
clonotype751	3-Activated	1	UM2-A2:17
clonotype752	1-Naive	1	UM2-A2:17
clonotype755	4-Helper-like UM2	1	UM2-A2:37
clonotype756	1-Naive	1	UM2-A2:14
clonotype758	1-Naive	1	UM2-A2:17
clonotype759	1-Naive	1	UM2-A2:37
clonotype762	1-Naive	1	UM2-A2:17
clonotype764	1-Naive	1	UM2-A2:37
clonotype770	1-Naive	1	UM2-A2:17
clonotype774	1-Naive	1	UM2-A2:37
clonotype776	4-Helper-like UM2	1	UM2-A2:37
clonotype779	1-Naive	1	UM2-A2:37
clonotype782	1-Naive	1	UM2-A2:17
clonotype783	1-Naive	1	UM2-A2:14
clonotype784	1-Naive	1	UM2-A2:14
clonotype786	1-Naive	1	UM2-A2:37
clonotype787	1-Naive	1	UM2-A2:37
clonotype789	1-Naive	1	UM2-A2:14
clonotype792	1-Naive	1	UM2-A2:37
clonotype793	3-Activated	1	UM2-A2:37
clonotype795	3-Activated	1	UM3-A2:18
clonotype797	1-Naive	1	UM3-A2:18
clonotype798	1-Naive	1	UM2-A2:37
clonotype800	1-Naive	1	UM2-A2:14
clonotype802	1-Naive	1	UM2-A2:37
clonotype804	1-Naive	1	UM2-A2:17
clonotype806	1-Naive	1	UM2-A2:17
clonotype807	3-Activated	1	UM2-A2:17
clonotype808	1-Naive	1	UM2-A2:17
clonotype809	1-Naive	1	UM2-A2:37
clonotype812	1-Naive	1	UM2-A2:17
clonotype813	1-Naive	1	UM2-A2:14
clonotype816	1-Naive	1	UM2-A2:14
clonotype817	1-Naive	1	UM2-A2:37
clonotype818	1-Naive	1	UM2-A2:37
clonotype820	1-Naive	1	UM2-A2:37
clonotype825	1-Naive	1	UM2-A2:17
clonotype830	1-Naive	1	UM2-A2:14
clonotype831	1-Naive	1	UM2-A2:37
clonotype832	1-Naive	1	UM2-A2:37
clonotype833	1-Naive	1	UM2-A2:17
clonotype836	1-Naive	1	UM2-A2:37
clonotype838	1-Naive	1	UM2-A2:37
clonotype839	1-Naive	1	UM2-A2:17
clonotype841	1-Naive	1	UM2-A2:17
clonotype845	1-Naive	1	UM2-A2:14
clonotype848	1-Naive	1	UM2-A2:37
clonotype853	1-Naive	1	UM2-A2:14
clonotype856	1-Naive	1	UM2-A2:37
clonotype858	1-Naive	1	UM2-A2:17
clonotype864	1-Naive	1	UM2-A2:37
clonotype865	1-Naive	1	UM2-A2:14
clonotype866	2-Cytotoxic effectors	1	UM2-A2:17
clonotype867	1-Naive	1	UM2-A2:37
clonotype87	1-Naive	1	UM2-A2:17
clonotype871	1-Naive	1	UM2-A2:37
clonotype873	1-Naive	1	UM2-A2:37
clonotype875	1-Naive	1	UM2-A2:17
clonotype876	1-Naive	1	UM2-A2:14
clonotype877	1-Naive	1	UM2-A2:17
clonotype878	3-Activated	1	UM2-A2:37
clonotype880	1-Naive	1	UM2-A2:37
clonotype881	1-Naive	1	UM2-A2:17
clonotype895	3-Activated	1	UM2-A2:37
clonotype897	1-Naive	1	UM2-A2:37
clonotype898	1-Naive	1	UM3-A2:18
clonotype900	1-Naive	1	UM2-A2:37
clonotype902	1-Naive	1	UM2-A2:14
clonotype903	3-Activated	1	UM2-A2:37
clonotype905	1-Naive	1	UM2-A2:17
clonotype908	2-Cytotoxic effectors	1	UM3-A2:18
clonotype909	1-Naive	1	UM2-A2:37
clonotype910	3-Activated	1	UM2-A2:37
clonotype911	3-Activated	1	UM2-A2:37
clonotype915	1-Naive	1	UM2-A2:37
clonotype917	1-Naive	1	UM2-A2:37
clonotype920	1-Naive	1	UM2-A2:17
clonotype921	1-Naive	1	UM2-A2:37
clonotype922	1-Naive	1	UM2-A2:26
clonotype924	1-Naive	1	UM2-A2:37
clonotype927	1-Naive	1	UM2-A2:17
clonotype928	6-CCR9+ effectors	1	UM2-A2:37
clonotype935	1-Naive	1	UM2-A2:17
clonotype937	1-Naive	1	UM2-A2:17
clonotype939	1-Naive	1	UM2-A2:17
clonotype941	1-Naive	1	UM2-A2:17
clonotype945	1-Naive	1	UM2-A2:14
clonotype946	1-Naive	1	UM2-A2:17
clonotype947	1-Naive	1	UM2-A2:26
clonotype951	1-Naive	1	UM2-A2:37
clonotype953	3-Activated	1	UM2-A2:26
clonotype954	1-Naive	1	UM2-A2:37
clonotype955	1-Naive	1	UM2-A2:17
clonotype956	1-Naive	1	UM2-A2:37
clonotype959	1-Naive	1	UM2-A2:37
clonotype960	1-Naive	1	UM2-A2:37
clonotype962	1-Naive	1	UM2-A2:37
clonotype964	1-Naive	1	UM2-A2:37
clonotype968	3-Activated	1	UM2-A2:37
clonotype969	1-Naive	1	UM2-A2:14
clonotype972	6-CCR9+ effectors	1	UM2-A2:37
clonotype974	2-Cytotoxic effectors	1	UM2-A2:37
clonotype978	1-Naive	1	UM2-A2:37
clonotype982	1-Naive	1	UM2-A2:37
clonotype983	1-Naive	1	UM2-A2:17
clonotype984	1-Naive	1	UM2-A2:37
clonotype985	1-Naive	1	UM2-A2:17
clonotype986	1-Naive	1	UM2-A2:37
clonotype987	4-Helper-like UM2	1	UM2-A2:26
clonotype988	1-Naive	1	UM2-A2:37
clonotype990	1-Naive	1	UM2-A2:37
clonotype994	1-Naive	1	UM2-A2:37
clonotype997	1-Naive	1	UM2-A2:37
clonotype998	1-Naive	1	UM2-A2:14
