# Supplementary material for: Splicing Patterns in SF3B1 -Mutated Uveal Melanoma Generate Shared Immunogenic Tumor-Specific Neoepitopes
Source: Oxford University Press journal article supplement (doi:10.1158/2159-8290.cd-20-0555), 2021-04-02
Supplement: cd-20-0555_supplementary_table_s7_suppst7.xlsx [file cd-20-0555_supplementary_table_s7_suppst7.xlsx]

## Sheet: Feuil1
Peptide	Donor (UM/HD)	Donor ID	Donor ID	Clone ID	Used in Figure	TRAV	TRAJ	CDR3 TCR alpha AA	TRBV	TRBD	TRBJ	CDR3 TCR beta AA
14	HD	HD1	HD1	48B4	S5-D	ND	ND	ND	ND	ND	ND	ND
14	UM	UM4	SAI	52E5		TRAV24	TRAJ37	CAFDRGSSNAGKLIF	TRBV2	TRBD1	TRBJ2-1	CASEGVHEQFF
17	HD	HD1	HD1	49D5	S5-A	TRAV35	TRAJ26	CAGLPYGQNFVF	TRBV18	TRBJ1-3	TRBD1	CASSPVGWGNTIYF
18	HD	HD2	HD2	29D9	4A, 4B, 4C, 4D, 4E, 4F, 4G	TRAV17	TRAJ53	CATDKGSGGSNYKLTF	TRBV14	TRBJ2-7	TRBD	CASSTMGDYYEQYF
18	HD	HD2	HD2	29D9		TRAV24	TRAJ20	CAFWSAYKLSF
26	UM	UM2	GEN	12E11	4I, S5-B	TRAV22	TRAJ30	CAALGGDKIIF	TRBV7-6	TRBD1	TRBJ1-3	CASSLWAGNTIYF
26	HD	HD1	HD1	39E6		TRAV8-2	TRAJ49	CAVRNTGNQFYF	TRBV15	TRBJ1-6	TRBD1	CAINSGFGSPLHF
26	HD	HD1	HD1	39E6		TRAV17	TRAJ43	CATDDDMRF
26	HD	HD1	HD1	39F10		TRAV13	TRAJ26	CAAPGNYGQNFVF	TRBV20-1	No	TRBJ2-7	CSASQIYEQYF
26	HD	HD1	HD1	39G5		TRAV35	TRAJ30	CAGIVRDDKIIF	TRBV7-7	TRBJ2-7	TRBD1	CASSFSLQYEQYF
37	UM	UM1	LHO	4E4	4I, S5-C	TRAV38	TRAJ57	CAFLQGGSEKLVF	TRBV28	TRBD2	TRBJ2-5	CASSLFGLAGVEETQYF
37	UM	UM1	LHO	4E5		TRAV38	TRAJ28	CAFMKHEDSGAGSYQLTF	TRBV3-1	TRBD1	TRBJ2-5	CASSQAISDREVWDQETQYF
37	UM	UM1	LHO	4F6		TRAV12-1	TRAJ53	CVGGGGSNYKLTF	TRBV27	TRBD2	TRBJ2-1	CASSLTPPGSYNEQFF
37	UM	UM1	LHO	5E11		TRAV17	TRAJ5	CAPSLMDTGRRALTF	TRBV12-3	TRBD2	TRBJ2-1	CASSFGGDGYNEQFF
37	UM	UM1	LHO	6D11		TRAV9-2	TRAJ29	CASGLPDTPLVF	TRBV13	TRBD1	TRBJ1-5	CASSLRDRGNQPQHF
37	UM	UM1	LHO	6D11		TRAV12-3	TRAJ9	CAMSAPDTGGFKTIF
37	HD	HD2	HD2	23B2		TRAV14	TRAJ5	CAMIEWDTGRRALIF	TRBV29-1	TRBJ2-1	TRBD2	CSVEDLGAGVSNEQFF
37	HD	HD2	HD2	23D4		TRAV38-1	TRAJ31	CAFFEYDNNARLMF	TRBV3-1	TRBJ2-7	TRBD1	CASSYEDHEQYF
37	UM	UM4	SAI	52D5		TRAV9-2	TRAJ52	CALSDRDGGTSYGKLTF	TRBV6-5	TRBD1	TRBJ2-7	CASSYSPGYEQYF
37	UM	UM4	SAI	52D10		TRAV22	TRAJ57	CAVPLRADLTKLVF	TRBV27	TRBD2	TRBJ2-1	CASSLEVGLAPNEQFF
37	UM	UM1	LHO	52F8		TRAV19	TRAJ12	CALTEVDSSYKLIF	TRBV27	TRBD2	TRBJ2-7	CASSLAGGSYEQYF
37	UM	UM4	SAI	52F4		TRAV19	TRAJ40	CALSEATSGTYKYIF	TRBV27	TRBD2	TRBJ1-1	CASSLITGDTEAFF
47	HD	HD1	HD1	40F11		TRAV14	TRAJ48	CAMRAFGNEKLTF	TRBV7-9	TRBJ2-1	TRBD1	CASSPRDEQFF
