# Supplementary material for: Splicing Patterns in SF3B1 -Mutated Uveal Melanoma Generate Shared Immunogenic Tumor-Specific Neoepitopes
Source: Oxford University Press journal article supplement (doi:10.1158/2159-8290.cd-20-0555), 2021-04-02
Supplement: cd-20-0555_supplementary_table_s8_suppst8.docx [file cd-20-0555_supplementary_table_s8_suppst8.docx]

| **Peptide #** | **Protein** | **Expected size of alt mRNA** | **frameshift** | **Predicted NMD** | **Primer** |
| --- | --- | --- | --- | --- | --- |
| 14 | NF1 | + 14 | YES | YES | Forw: 6-FAM-AATCAGGAGAAAATTGGGCAGT Reverse: AGTGTTGCCATCTTATCAAAAGG |
| 17 | ATP8B2 | + 20 | YES | YES | Forw: 6-FAM-GTGCTGCGAAACACCGAG Reverse: AAAATCCAGAGCACCAGGGT |
| 18 | USP39 | + 40 | YES | YES | Forw: 6-FAM-TCTCCCTCTCACACATCAATG Reverse: GTGTGGAGGTTGAGGAAAACA |
| 26 | NET1 | + 22 | YES | NO | Forw: 6-FAM-GGACCCCAGAATCGAAGCG Reverse CCGTTCGTTCCGTGTGAC |
| 37 | MAPK81P2 | + 16 | YES | NO | Forw: 6-FAM-CACGTCTTTGTCTCCCAGGA Reverse: CCGTTCGTTCCGTGTGAC |

**Sup table** **8** : List of the alternative mRNA junctions quantified using fluorescent primers and capillary electrophoresis.
