# Supplementary material for: Splicing Patterns in SF3B1 -Mutated Uveal Melanoma Generate Shared Immunogenic Tumor-Specific Neoepitopes
Source: Oxford University Press journal article supplement (doi:10.1158/2159-8290.cd-20-0555), 2021-04-02
Supplement: cd-20-0555_supplementary_table_s9_suppst9.xlsx [file cd-20-0555_supplementary_table_s9_suppst9.xlsx]

## Sheet: TCR primers
PCR1 Forward primers			PCR2 Forward primers
Alpha Forward			Nested alpha forward 2 with adaptor CS1 (in red)
TRAV1	CTGCACGTACCAGACATCTGGGTT		TRAV1	ACACTGACGACATGGTTCTACAAGGTCGTTTTTCTTCATTCCTTAGTC
TRAV2	GGCTCAAAGCCTTCTCAGCAGG		TRAV2	ACACTGACGACATGGTTCTACAACGATACAACATGACCTATGAACGG
TRAV3	GGATAACCTGGTTAAAGGCAGCTA		TRAV3.1	ACACTGACGACATGGTTCTACACTTTGAAGCTGAATTTAACAAGAGCC
TRAV4	GGATACAAGACAAAAGTTACAAACGA		TRAV4.1	ACACTGACGACATGGTTCTACACTCCCTGTTTATCCCTGCCGAC
TRAV5	GCTGACGTATATTTTTTCAAATATGGA		TRAV5.1	ACACTGACGACATGGTTCTACAAAACAAGACCAAAGACTCACTGTTC
TRAV6	GGAAGAGGCCCTGTTTTCTTGCT		TRAV6	ACACTGACGACATGGTTCTACAAAGACTGAAGGTCACCTTTGATACC
TRAV7	GCTGGATATGAGAAGCAGAAAGGA		TRAV7	ACACTGACGACATGGTTCTACAACTAAATGCTACATTACTGAAGAATGG
TRAV8	AGGACTCCAGCTTCTCCTGAAGTA		TRAV8	ACACTGACGACATGGTTCTACAGCATCAACGGTTTTGAGGCTGAATTTAA
TRAV9	GTATGTCCAATATCCTGGAGAAGGT		TRAV9	ACACTGACGACATGGTTCTACAGAAACCACTTCTTTCCACTTGGAGAA
TRAV10	CAGTGAGAACACAAAGTCGAACGG		TRAV10	ACACTGACGACATGGTTCTACATACAGCAACTCTGGATGCAGACAC
TRAV12.1	CCTAAGTTGCTGATGTCCGTATAC		TRAV12	ACACTGACGACATGGTTCTACAGAAGATGGAAGGTTTACAGCACA
TRAV12.2	GGGAAAAGCCCTGAGTTGATAATGT		TRAV13.1	ACACTGACGACATGGTTCTACAGACATTCGTTCAAATGTGGGCGAA
TRAV12.3	GCTGATGTACACATACTCCAGTGG		TRAV13.2	ACACTGACGACATGGTTCTACAGGCAAGGCCAAAGAGTCACCGT
TRAV13.1	CCCTTGGTATAAGCAAGAACTTGG		TRAV14	ACACTGACGACATGGTTCTACATCCAGAAGGCAAGAAAATCCGCCA
TRAV13.2	CCTCAATTCATTATAGACATTCGTTC		TRAV16	ACACTGACGACATGGTTCTACAGCTGACCTTAACAAAGGCGAGACA
TRAV14	GCAAAATGCAACAGAAGGTCGCTA		TRAV17	ACACTGACGACATGGTTCTACATTAAGAGTCACGCTTGACACTTCCA
TRAV16	TAGAGAGAGCATCAAAGGCTTCAC		TRAV18	ACACTGACGACATGGTTCTACAGCAGAGGTTTTCAGGCCAGTCCT
TRAV17	CGTTCAAATGAAAGAGAGAAACACAG		TRAV19	ACACTGACGACATGGTTCTACATCCACCAGTTCCTTCAACTTCACC
TRAV18	CCTGAAAAGTTCAGAAAACCAGGAG		TRAV20	ACACTGACGACATGGTTCTACAGCCACATTAACAAAGAAGGAAAGCT
TRAV19	GGTCGGTATTCTTGGAACTTCCAG		TRAV21	ACACTGACGACATGGTTCTACAGCCTCGCTGGATAAATCATCAGGA
TRAV20	GCTGGGGAAGAAAAGGAGAAAGAAA		TRAV22	ACACTGACGACATGGTTCTACAACGACTGTCGCTACGGAACGCTA
TRAV21	GTCAGAGAGAGCAAACAAGTGGAA		TRAV23	ACACTGACGACATGGTTCTACACACAATCTCCTTCAATAAAAGTGCCA
TRAV22	GGACAAAACAGAATGGAAGATTAAGC		TRAV24	ACACTGACGACATGGTTCTACAACGAATAAGTGCCACTCTTAATACCA
TRAV23	CCAGATGTGAGTGAAAAGAAAGAAG		TRAV25	ACACTGACGACATGGTTCTACAGTTTGGAGAAGCAAAAAAGAACAGCT
TRAV24	GACTTTAAATGGGGATGAAAAGAAGA		TRAV26.1	ACACTGACGACATGGTTCTACACAGAAGACAGAAAGTCCAGCACCT
TRAV25	GGAGAAGTGAAGAAGCAGAAAAGAC		TRAV26.2	ACACTGACGACATGGTTCTACAATCGCTGAAGACAGAAAGTCCAGT
TRAV26.1	CCAATGAAATGGCCTCTCTGATCA		TRAV27	ACACTGACGACATGGTTCTACAACTAACCTTTCAGTTTGGTGATGCAA
TRAV26.2	GCAATGTGAACAACAGAATGGCCT		TRAV29	ACACTGACGACATGGTTCTACACTTAAACAAAAGTGCCAAGCACCTC
TRAV27	GGTGGAGAAGTGAAGAAGCTGAAG		TRAV30	ACACTGACGACATGGTTCTACAAATATCTGCTTCATTTAATGAAAAAAAGC
TRAV29	GGATAAAAATGAAGATGGAAGATTCAC		TRAV34	ACACTGACGACATGGTTCTACACCAAGTTGGATGAGAAAAAGCAGCA
TRAV30	CCTGATGATATTACTGAAGGGTGGA		TRAV35	ACACTGACGACATGGTTCTACACTCAGTTTGGTATAACCAGAAAGGA
TRAV34	GGTGGGGAAGAGAAAAGTCATGAA		TRAV36	ACACTGACGACATGGTTCTACAGGAAGACTAAGTAGCATATTAGATAAG
TRAV35	GGTGAATTGACCTCAAATGGAAGAC		TRAV38	ACACTGACGACATGGTTCTACACTGTGAACTTCCAGAAAGCAGCCA
TRAV36	GCTAACTTCAAGTGGAATTGAAAAGA		TRAV39	ACACTGACGACATGGTTCTACACCTCACTTGATACCAAAGCCCGT
TRAV38	GAAGCTTATAAGCAACAGAATGCAAC		TRAV40	ACACTGACGACATGGTTCTACAAGGCGGAAATATTAAAGACAAAAACTC
TRAV39	GGAGCAGTGAAGCAGGAGGGAC		TRAV41	ACACTGACGACATGGTTCTACAGATTAATTGCCACAATAAACATACAGG
TRAV40	GAGAGACAATGGAAAACAGCAAAAAC
TRAV41	GCTGAGCTCAGGGAAGAAGAAGC
Beta Forward			Nested beta forward 2 with adaptor CS1 (in red)
TRBV2	CTGAAATATTCGATGATCAATTCTCAG		TRBV2	ACACTGACGACATGGTTCTACAGCCTGATGGATCAAATTTCACTCTG
TRBV3-1	TCATTATAAATGAAACAGTTCCAAATCG		TRBV3-1	ACACTGACGACATGGTTCTACATCTCACCTAAATCTCCAGACAAAGCT
TRBV4	AGTGTGCCAAGTCGCTTCTCAC		TRBV4	ACACTGACGACATGGTTCTACACCTGAATGCCCCAACAGCTCTC
TRBV5-4,8	CAGAGGAAACTYCCCTCCTAGATT		TRBV5-4,8	ACACTGACGACATGGTTCTACACTCTGAGCTGAATGTGAACGCCT
TRBV5-1	GAGACACAGAGAAACAAAGGAAACTTC		TRBV5-1	ACACTGACGACATGGTTCTACACGATTCTCAGGGCGCCAGTTCTCT
TRBV6-1	GGTACCACTGACAAAGGAGAAGTCC		TRBV6-1	ACACTGACGACATGGTTCTACATGGCTACAATGTCTCCAGATTAAACAA
TRBV6-2,3	GAGGGTACAACTGCCAAAGGAGAGGT		TRBV6-2,3	ACACTGACGACATGGTTCTACACCCTGATGGCTACAATGTCTCCAGA
TRBV6-4	GGCAAAGGAGAAGTCCCTGATGGTT		TRBV6-4	ACACTGACGACATGGTTCTACAGTGTCTCCAGAGCAAACACAGATGATT
TRBV6-5,6	AAGGAGAAGTCCCSAATGGCTACAA		TRBV6-5,6	ACACTGACGACATGGTTCTACAGTCTCCAGATCAACCACAGAGGAT
TRBV6-8	CTGACAAAGAAGTCCCCAATGGCTAC		TRBV6-8	ACACTGACGACATGGTTCTACAGTCTCTAGATTAAACACAGAGGATTTC
TRBV6-9	CACTGACAAAGGAGAAGTCCCCGAT		TRBV6-9	ACACTGACGACATGGTTCTACAGGCTACAATGTATCCAGATCAAACA
TRBV7-2	AGACAAATCAGGGCTGCCCAGTGA		TRBV7-2	ACACTGACGACATGGTTCTACATCGCTTCTCTGCAGAGAGGACTGG
TRBV7-3	GACTCAGGGCTGCCCAACGAT		TRBV7-3	ACACTGACGACATGGTTCTACACGGTTCTTTGCAGTCAGGCCTGA
TRBV7-8	CCAGAATGAAGCTCAACTAGACAA		TRBV7-8	ACACTGACGACATGGTTCTACACCAGTGATCGCTTCTTTGCAGAAA
TRBV7-4,6	GGTTCTCTGCAGAGAGGCCTGAG		TRBV7-4,6	ACACTGACGACATGGTTCTACATCTCCACTCTGAMGATCCAGCGCA
TRBV7-7	GGCTGCCCAGTGATCGGTTCTC		TRBV7-7	ACACTGACGACATGGTTCTACAGCAGAGAGGCCTGAGGGATCCAT
TRBV7-9	GACTTACTTCCAGAATGAAGCTCAACT		TRBV7-9	ACACTGACGACATGGTTCTACACTGCAGAGAGGCCTAAGGGATCT
TRBV9	GAGCAAAAGGAAACATTCTTGAACGATT		TRBV9	ACACTGACGACATGGTTCTACACTCCGCACAACAGTTCCCTGACTT
TRBV10-1,3	GGCTRATCCATTACTCATATGGTGTT		TRBV10-1,3	ACACTGACGACATGGTTCTACACAGATGGCTAYAGTGTCTCTAGATCAAA
TRBV10-2	GATAAAGGAGAAGTCCCCGATGGCT		TRBV10-2	ACACTGACGACATGGTTCTACAGTTGTCTCCAGATCCAAGACAGAGAA
TRBV11	GATTCACAGTTGCCTAAGGATCGAT		TRBV11	ACACTGACGACATGGTTCTACAGCAGAGAGGCTCAAAGGAGTAGACT
TRBV12-3,4	GATTCAGGGATGCCCGAGGATCG		TRBV12-3,4	ACACTGACGACATGGTTCTACAGCTAAGATGCCTAATGCATCATTCTC
TRBV12-5	GATTCGGGGATGCCGAAGGATCG		TRBV12-5	ACACTGACGACATGGTTCTACACTCAGCAGAGATGCCTGATGCAACT
TRBV13	GCAGAGCGATAAAGGAAGCATCCCT		TRBV13	ACACTGACGACATGGTTCTACATCTCAGCTCAACAGTTCAGTGACTA
TRBV14	TCCGGTATGCCCAACAATCGATTCT		TRBV14	ACACTGACGACATGGTTCTACAGCTGAAAGGACTGGAGGGACGTAT
TRBV15	GATTTTAACAATGAAGCAGACACCCCT		TRBV15	ACACTGACGACATGGTTCTACAGATAACTTCCAATCCAGGAGGCCG
TRBV16	GATGAAACAGGTATGCCCAAGGAAAG		TRBV16	ACACTGACGACATGGTTCTACAGCTAAGTGCCTCCCAAATTCACCC
TRBV18	TATCATAGATGAGTCAGGAATGCCAAAG		TRBV18	ACACTGACGACATGGTTCTACAGGAACGATTTTCTGCTGAATTTCCCA
TRBV19	GACTTTCAGAAAGGAGATATAGCTGAA		TRBV19	ACACTGACGACATGGTTCTACAGGTACAGCGTCTCTCGGGAGAAGA
TRBV20-1	CAAGGCCACATACGAGCAAGGCGTC		TRBV20-1	ACACTGACGACATGGTTCTACAGGACAAGTTTCTCATCAACCATGCAA
TRBV24-1	CAAAGATATAAACAAAGGAGAGATCTCT		TRBV24-1	ACACTGACGACATGGTTCTACATGGATACAGTGTCTCTCGACAGGC
TRBV25-1	AGAGAAGGGAGATCTTTCCTCTGAGT		TRBV25-1	ACACTGACGACATGGTTCTACACAACAGTCTCCAGAATAAGGACGGA
TRBV27-1	GACTGATAAGGGAGATGTTCCTGAAG		TRBV27-1	ACACTGACGACATGGTTCTACATACAAAGTCTCTCGAAAAGAGAAGAGGA
TRBV28	GGCTGATCTATTTCTCATATGATGTTAA		TRBV28	ACACTGACGACATGGTTCTACAGGGGTACAGTGTCTCTAGAGAGA
TRBV29	GCCACATATGAGAGTGGATTTGTCATT		TRBV29	ACACTGACGACATGGTTCTACAGTTTCCCATCAGCCGCCCAAACCTA
TRBV30	GGTGCCCCAGAATCTCTCAGCCT		TRBV30	ACACTGACGACATGGTTCTACACAGACCCCAGGACCGGCAGTTCAT
PCR1 & 2 Reverse primers
Alpha Reverse with CS2 adaptor (in orange)
CS2-TRAC	TACGGTAGCAGAGACTTGGTCTTCGGTGAATAGGCAGACAGACTTGT
Beta Reverse with CS2 adaptor (in orange)
CS2-TRBC	TACGGTAGCAGAGACTTGGTCTTACCAGTGTGGCCTTTTGGGTGTG
